# Supplementary material for: Cell-type-specific control of basolateral amygdala neuronal circuits via entorhinal cortex-driven feedforward inhibition
Source: eLife. 2020 Jan 9;9:e50601. doi: 10.7554/eLife.50601 (PMC6984813; doi:10.7554/eLife.50601)
Supplement: Figure 1—source data 1. — Normal data data presented as mean ± s.e.m. Non-normal data presented as median and [1st quartile/3rd quartile]. [file elife-50601-fig1-data1.xlsx]

## Sheet: Sheet1
		Figure panel	Data structure	Test	Sample size	Summary statistics	Statistical test results
		D, left	Non-normal distribution	Kruskal-Wallis test followed by posthoc Mann-Whitney U tests with a False Discovery Rate p value correction (Curran-Everett, 2000)	ncontrol = 8 cells, 4 mice	EPSCctrl = -41.17 [-34.10/-51.47] pA	Kruskal-Wallis: p = 6.72 × 10-4
					ngbz = 7, 4	EPSCgbz = -34.18 [-24.40/-39.23] pA	False Discovery Rate corrected α = 0.033
					nDNQX/APV = 7, 4	EPSCDNQX/APV = -4.59 [-1.49/-5.35] pA	Mann-Whitney U tests:
							pCtrl vs gbz = 0.19
							pCtrl vs DNQX/APV = 3.11 × 10-4
							pgbz vs DNQX/APV = 5.83 × 10-4
		D, right	Non-normal distribution	Kruskal-Wallis test followed by posthoc Mann-Whitney U tests with a False Discovery Rate p value correction	ncontrol = 8, 4	IPSCctrl = 148.82 [65.13/231.10] pA	Kruskal-Wallis: p = 6.45 × 10-4
					ngbz = 7, 4	IPSCgbz = 1.00 [-0.98/2.50] pA	False Discovery Rate corrected α = 0.033
					nDNQX/APV = 7, 4	IPSCDNQX/APV = 1.08 [0.56/3.15] pA	Mann-Whitney U tests:
							pCtrl vs gbz = 3.11 × 10-4
							pCtrl vs DNQX/APV = 3.11 × 10-4
							pgbz vs DNQX/APV = 0.71
		E	Normal distribution	Paired t-test	n = 8, 4	LatencyEPSC = 7.65 ± 0.51 ms	p = 0.023
						LatencyIPSC = 10.72 ± 0.85 ms
		G	Non-normal distribution	Wilcoxon signed rank test	n = 8, 3	APs/stimulusctrl = 0.00 [0.00/0.07]	p = 0.031
						APs/stimulusgbz = 0.26 [0.03/0.64]
		H	Non-normal distribution	Wilcoxon signed rank test	n = 8, 3	Vm-ctrl = -60.07 [-60.55/-59.79] mV	p = 0.38
						Vm-gbz = -60.91 [-61.68/-59.34] mV
