# Supplementary material for: Cell-type-specific control of basolateral amygdala neuronal circuits via entorhinal cortex-driven feedforward inhibition
Source: eLife. 2020 Jan 9;9:e50601. doi: 10.7554/eLife.50601 (PMC6984813; doi:10.7554/eLife.50601)
Supplement: Figure 1—source data 2. [file elife-50601-fig1-data2.xlsx]

## Sheet: Sheet1
		Panel	Group	Measure	Values
		1D, left	Control	EPSC amplitude (pA)	-32.952
					-122.11
					-25.6402
					-35.238
					-46.4511
					-41.1018
					-56.4792
					-41.2296
			gbz		-25.8222
					-110.381
					-16.6943
					-34.1829
					-23.9232
					-37.1888
					-39.9132
			DNQX/D-APV		-11.6751
					-5.3665
					-5.2808
					-1.0405
					-2.8457
					-4.591
					-0.8086
		1D, right	Control	IPSC amplitude (pA)	118.563
					232.761
					31.0449
					40.535
					229.571
					89.7157
					179.085
					232.63
			gbz		2.7227
					0.294
					-4.4177
					-1.4
					4.5305
					1.0029
					1.8194
			DNQX/D-APV		15.3225
					-2.3508
					0.4149
					3.802
					1.2
					0.9988
					1.0758
		1E	EPSC	Onset latency (ms)	8.6556
					8.25
					8.6333
					6.04
					7.5
					9.66
					5.31
					7.1143
			IPSC		0.8111
					11.48
					10.2
					13.05
					9.5
					8.1778
					7.67
					14.8333
		1G	control	APs per stimulus (count)	0
					0.11
					0
					0
					0
					0.12
					0
					0.02
			gbz		0
					0.16
					0.06
					0.36
					1.01
					0.81
					0
					0.46
		1H	ctrl	Vm (mV)	-59.6723
					-60.8278
					-60.2816
					-58.9915
					-60.0855
					-60.0505
					-59.9138
					-64.6733
			gbz		-60.5212
					-61.2984
					-55.3978
					-58.5468
					-61.7883
					-61.5731
					-60.1364
					-65.0638
