# Supplementary material for: Cell-type-specific control of basolateral amygdala neuronal circuits via entorhinal cortex-driven feedforward inhibition
Source: eLife. 2020 Jan 9;9:e50601. doi: 10.7554/eLife.50601 (PMC6984813; doi:10.7554/eLife.50601)
Supplement: Figure 2—source data 1. — Non-normal data presented as median and [1st quartile/3rd quartile]. [file elife-50601-fig2-data1.xlsx]

## Sheet: Sheet1
		Figure Panel	Data Structure	Test	Sample Size	Summary Statistics	Statistical Test Results
		D	Non-normal distribution	Kruskal-Wallis test followed by posthoc Mann-Whitney U tests with a False Discovery Rate p value correction	nSst = 16, 8	Sst+ uEPSC amplitude = -44.81 [-34.39/-55.80] pA	Kruskal-Wallis: p = 5.55 × 10-4
					nPV = 15, 5	PV+ uEPSC amplitude = -43.03 [-39.02/-58.51] pA	False Discovery Rate corrected α = 0.033
					nPN = 12, 8	PN uEPSC amplitude = -18.90 [-15.57/-26.22] pA	Mann-Whitney U tests:
							pSst vs PV = 0.95
							pSst vs PN = 6.45 × 10-4
							pPV vs PN = 8.30 × 10-4
		E, left	Non-normal distribution	Kruskal-Wallis test followed by posthoc Mann-Whitney U tests with a False Discovery Rate p value correction	nSst = 16, 8	Sst+ uEPSC risetime = 0.42 [0.36/0.52] ms	Kruskal-Wallis: p = 1.66 × 10-5
					nPV = 15, 5	PV+ uEPSC risetime = 0.51 [0.41/0.65] ms	False Discovery Rate corrected α = 0.033
					nPN = 12, 8	PN uEPSC risetime = 1.56 [1.04/2.03] ms	Mann-Whitney U tests:
							pSst vs PV = 0.29
							pSst vs PN = 2.16 × 10-5
							pPV vs PN = 1.56 × 10-4
		E, right	Non-normal distribution	Kruskal-Wallis test followed by posthoc Mann-Whitney U tests with a False Discovery Rate p value correction	nSst = 16, 8	Sst+ uEPSC decay = 2.38 [1.67/3.80] ms	Kruskal-Wallis: p = 2.18 × 10-5
					nPV = 15, 5	PV+ uEPSC decay = 1.95 [1.57/3.23] ms	False Discovery Rate corrected α = 0.033
					nPN = 12, 8	PN uEPSC decay = 8.68 [6.30/10.70] ms	Mann-Whitney U tests:
							pSst vs PV = 0.40
							pSst vs PN = 3.21 × 10-4
							pPV vs PN = 1.26 × 10-5
		F	Non-normal distribution	Kruskal-Wallis test followed by posthoc Mann-Whitney U tests with a False Discovery Rate p value correction	nSst = 16, 8	Sst+ uEPSC thresh. intensity = 17.40 [5.01/64.00] nC	Kruskal-Wallis: p = 3.33 × 10-4
					nPV = 15, 5	PV+ uEPSC thresh. intensity = 114.00 [30.00/160.00] nC	False Discovery Rate corrected α = 0.033
					nPN = 12, 8	PN uEPSC thresh. intensity = 273.00 [89.00/544.00] nC	Mann-Whitney U tests:
							pSst vs PV = 0.0047
							pSst vs PN = 3.83 × 10-4
							pPV vs PN = 0.092
