# Supplementary material for: Cell-type-specific control of basolateral amygdala neuronal circuits via entorhinal cortex-driven feedforward inhibition
Source: eLife. 2020 Jan 9;9:e50601. doi: 10.7554/eLife.50601 (PMC6984813; doi:10.7554/eLife.50601)
Supplement: Figure 2—source data 2. [file elife-50601-fig2-data2.xlsx]

## Sheet: Sheet1
		Panel	Group	Measure	Values		Panel	Group	Measure	Values		Panel	Group	Measure	Values
		2B	PN	Neurons with uEPSC (%)	50		2S1A	Control	peak amplitude (pA)	-18.4716		2S2B	Sst/tdTomato	Colocalization (%)	93.7
			Sst		45.71					-14.0059					81.2
			PV		93.75					-26.1759					89.4
		2D/2S3B	PN	uEPSC amplitude (pA)	-26.4379					-14.4758			PV/tdTomato		13.9
					-19.1355					-23.2975					11.1
					-15.5164					-14.221					14.8
					-17.99					-2.1124		2S2D	Sst/tdTomato	Colocalization (%)	16.9
					-12.431					-1.124					22.7
					-10.5733					-0.2689					15.3
					-24.0399					-3.6989			PV/tdTomato		92.5
					-15.6307					-3.0976					88.2
					-18.6635					-4.0695					91.8
					-78.3545					-2.0427
					-31.3406					-24.2151
					-26.0096					-17.8926
			Sst		-95.8377					-18.2541
					-43.1595					-18.4615
					-36.6724					-16.0823
					-89.5872					-26.3768
					-25.8957					-10.6956
					-28.757			DNQX/D-APV		-0.1913
					-32.1082					-0.1913
					-42.0941					-0.961
					-51.6229					-1.4626
					-74.2411					-4.2547
					-47.3107					-1.6145
					-45.0487					-3.5114
					-44.5673					-2.8972
					-45.7927					-4.624
					-59.9833					-2.5357
					-21.3364					-0.7123
			PV		-43.0302					-2.6528
					-31.9404					-1.4974
					-22.3451					0.2021
					-21.2885					-0.8757
					-115.215					-3.5594
					-149.902					-2.3589
					-39.0126					-2.8611
					-41.6155					-0.7179
					-57.2					-0.9765
					-39.0473					-1.9647
					-49.5676		2S1B	Control	Success rate (%)	90
					-58.9488					60
					-53.0145					90
					-39.6368					55
					-64.4301					50
		2E, left	PN	uEPSC 20%-80% risetime (ms)	1.8389					70
					0.725					40
					1.8941					40
					2.1636					65
					1.3556					80
					2.3429					50
					0.575					85
					2.6333			DNQX/D-APV		0
					1.1231					0
					1.0813					0
					1.77					0
					1					0
			Sst		0.3125					0
					0.4273					0
					0.7188					0
					0.42		2S1C	Control	peak amplitude (pA)	-4.2101
					0.5133					-30.9627
					0.9222					-3.0956
					0.3571					-3.4894
					0.4938					-4.868
					0.3364					-5.3373
					0.3583					-36.0797
					0.4636					-5.7442
					0.61					-3.8148
					0.3846					-4.5412
					0.34					-45.1512
					0.4					-20.9412
					0.5286					-3.496
			PV		0.4333					-39.0351
					0.8538					-69.8494
					0.5231					-45.3354
					0.6462					-15.6879
					0.525					-60.0517
					0.2917					-9.2095
					0.5083					-68.6679
					1.3471			DNQX/D-APV		-5.5267
					0.3467					-6.6664
					1.0273					-5.8387
					0.4214					-5.1051
					0.3571					-2.6472
					0.4133					-2.6668
					0.6545					-6.3479
					0.42					-2.0468
		2E, right	PN	uEPSC decay t (ms)	9.5183					-4.5463
					5.8911					-5.5134
					11.3416					-8.5532
					9.3837					-3.4109
					10.3117					-5.3832
					7.3017					-4.0528
					6.3736					-4.6864
					12.7523					-4.4166
					11.0936					-2.5652
					5.7921					-6.7306
					7.9701					-5.1505
					6.2272					-6.1519
			Sst		1.2682		2S1D	Control	Success rate (%)	80
					2.2204					55
					8.9628					80
					3.267					30
					3.0062					75
					19.842					90
					2.1045					70
					2.3239					80
					1.4992					55
					1.3392					60
					2.9616					55
					1.1182					50
					1.8323					65
					2.4351					50
					4.3428					75
					5.3845					70
			PV		2.1239			DNQX/D-APV		0
					1.9507					0
					3.7757					0
					3.329					0
					1.0392					0
					0.8222					0
					2.9349					0
					5.332		2S1E	Control	peak amplitude (pA)	-3.12
					2.3552					-3.2646
					5.5978					-50.4733
					1.5682					-4.1087
					1.5708					-1.4841
					1.4226					-0.552
					1.6143					-6.0332
					1.7802					-53.6645
		2F/2S3B	PN	uEPSC threshold intensity (nC)	400					-49.1028
					300					-5.1412
					200					-2.3421
					330					-53.3788
					41.1					-1.9017
					1008					-65.518
					44.4					-76.9945
					246					-5.076
					82					-2.6213
					96					-4.637
					742					-63.5097
					688					-15.4128
			Sst		25			DNQX/D-APV		-5.0433
					420					-4.8387
					7.3					-3.2702
					1.4					-9.1999
					81.8					-2.6936
					20.4					-3.7835
					90					-2.4649
					46.2					-1.7889
					86.2					-3.6859
					5.02					-3.3797
					1.94					-5.2895
					15.8					-1.6136
					4.55					-3.5328
					10.5					-3.0993
					5					-3.575
					19					-3.0907
			PV		6					-0.6042
					100					-3.0856
					120					-4.6511
					20					-1.6979
					120		2S1F	Control	Success rate (%)	75
					1600					70
					104					65
					124					65
					60					60
					188					60
					20					60
					114					90
					1500					75
					7.2					55
		2S3A, left	PN	uEPSC latency (ms)	9.7944					70
					6.85					35
					12.2529					75
					9.4909					55
					6.1667					50
					10.5929			DNQX/D-APV		0
					7.8875					0
					8.1667					0
					7.9077					20
					8.3812					15
					8.07					0
					8.4765					0
			Sst		9.2312					0
					11.1636					0
					6.6063					0
					3.24					0
					10.2467					5
					7.6333					15
					8.8286
					8.3313
					10.5
					8.7167
					8.3455
					9.46
					8.5
					11.26
					5.12
					11.35
			PV		6.8
					6.3923
					7.9615
					7.4308
					6.7333
					5.5833
					8.0333
					10.4059
					12.2867
					8.5364
					6.25
					6.4429
					8.82
					6.7364
					7.41
		2S3A, right	PN	uEPSC jitter (ms)	1.8187
					2.416
					1.1933
					1.0949
					1.6148
					2.3358
					0.1356
					2.1676
					0.357
					0.573
					2.675
					0.4131
			Sst		1.4845
					0.5025
					0.5471
					0.2881
					1.95
					2.22
					1.0118
					1.3845
					1.4199
					0.5149
					0.1809
					1.0906
					0.8926
					2.455
					0.939
					1.3495
			PV		1.4726
					0.8119
					1.9064
					2.6822
					1.3786
					0.7184
					0.5399
					1.0756
					2.4357
					1.7591
					1.2936
					0.3155
					1.2208
					1.4264
					1.26
