# Supplementary material for: Cell-type-specific control of basolateral amygdala neuronal circuits via entorhinal cortex-driven feedforward inhibition
Source: eLife. 2020 Jan 9;9:e50601. doi: 10.7554/eLife.50601 (PMC6984813; doi:10.7554/eLife.50601)
Supplement: Figure 3—source data 1. — Normal data are presented as mean ± s.e.m. with differences tested using a 1-way ANOVA with Tukey’s honestly significant difference post hoc test. Non-normal data are presented as median and IQR with differences tested using a Kruskal-Wallis (KW) test with Mann-Whitney U tests between groups as a post hoc. Multiple comparisons with the Mann-Whitney tests were corrected using the false discovery rate method where p < αFalseDiscoveryRate (FDR) was considered significant. [file elife-50601-fig3-data1.xlsx]

## Sheet: Sheet1
			Group I Sst+ IN (n = 60)		Group II Sst+ IN (n = 45)		PV+ IN (n = 52)		Statistical Comparisons
			Mean/Median	Variance	Mean/Median	Variance	Mean/Median	Variance
		Membrane Resistance (MΩ)	181.23a,b	136.91/277.74	291.81a,c	228.86/334.4	147.46b,c	95.72/221.33	KW: p = 2.65 × 10-10
									αFDR: 0.05
									aI vs II: p = 3.18 × 10-6
									bI vs PV: p = 0.011
									cII vs PV: p = 2.29 × 10-10
		Max. Firing Rate (Hz)	121.14a	± 4.87	66.75a,b	± 3.18	116.24b	± 7.29	ANOVA: p = 5.62 × 10-11
									aI vs II: p = 9.70 × 10-10
									bII vs PV: p = 4.22 × 10-9
		Latency to First Action Potential (ms)	84.65	57.40/175.7	85.1	60.75/133.3	131.15	70.40/229.1	NS, KW: p = 0.062
		Action Potential Halfwidth (ms)	0.50a,b	0.43/0.59	0.70a,c	0.60/0.87	0.44b,c	0.40/0.50	KW: p = 4.34 × 10-14
									αFDR: 0.05
									aI vs II: p = 2.21 × 10-9
									bI vs PV: p = 5.56 × 10-4
									cII vs PV: p = 3.86 ×10-12
		Firing Rate Adaptation	0.69a	0.59/0.89	0.53a,b	0.31/0.63	0.74b	0.37/0.92	KW: p = 1.89 × 10-4
									αFDR: 0.033
									aI vs II: p = 3.36 × 10-5
									bII vs PV: p = 0.0024
		Action Potential Broadening	1	1.00/1.20	1	1.00/1.14	1	1.00/1.23	NS, KW: p = 0.34
		Action Potential Threshold (mV)	-35.28	-39.47/-32.22	-34.83	-36.76/-30.77	-34.74	-38.79/-31.32	NS, KW: p = 0.51
		Action Potential Amplitude (mV)	46.80a	± 1.11	56.34a,b	± 1.91	50.09b	± 1.46	ANOVA: p = 5.18 × 10-5
									aI vs II: p = 1.47 × 10 -5
									bII vs PV: p = 0.012
		Amplitude Adaptation	0.88a	± 0.014	0.82a,b	± 0.018	0.89b	± 0.017	ANOVA: p = 0.011
									aI vs II: p = 0.038
									bII vs PV: p = 0.011
		AHP magnitude (mV)	20.04	± 0.52	19.42	± 0.9	21.2	± 0.58	NS, ANOVA: p = 0.17
		DAHP (mV)	2.72	1.69/4.05	2.84a	1.85/5.06	2.06a	1.08/3.22	KW: p = 0.018
									αFDR: 0.017
									aII vs PV: p = 0.011
		AHP Latency (ms)	3.20a	2.43/4.49	6.80a,b	2.83/15.58	3.00b	2.00/3.64	KW: p = 2.52 × 10-5
									αFDR: 0.033
									aI vs II: p = 8.24 × 10-4
									bII vs PV: p = 1.79 × 10-5
		Hyperpolarization-induced Sag (%)	4.41a	3.07/6.89	16.45a,b	10.24/25.17	5.38b	3.80/7.97	KW: p = 1.68 × 10-12
									αFDR: 0.033
									aI vs II: p = 2.74 × 10-11
									bII vs PV: p = 1.00 × 10-9
		Rebound Action Potentials	0.00a	0.00/0.00	0.00a,b	0.00/1.25	0.00b	0.00/0.00	KW: p = 1.92 × 10-9
									αFDR: 0.033
									aI vs II: p = 2.15 × 10-7
									bII vs PV: p = 5.68 × 10-6
		tMembrane (ms)	11.74a	9.57/16.05	19.53a,b	16.36/26.18	11.25b	9.74/14.26	KW: p = 2.70 × 10-11
									αFDR: 0.033
									aI vs II: p = 6.43 × 10-9
									bII vs PV: p = 1.18 × 10-10
