# Supplementary material for: Cell-type-specific control of basolateral amygdala neuronal circuits via entorhinal cortex-driven feedforward inhibition
Source: eLife. 2020 Jan 9;9:e50601. doi: 10.7554/eLife.50601 (PMC6984813; doi:10.7554/eLife.50601)
Supplement: Figure 3—source data 2. — Normal data presented as mean ± s.e.m. Non-normal data presented as median and [1st quartile/3rd quartile]. Data for I presented panel by panel from left to right. [file elife-50601-fig3-data2.xlsx]

## Sheet: Sheet1
		Figure Panel	Data Structure	Test	Sample Size	Summary Statistics	Statistical Test Results
		H, left	Normal Distribution	Unpaired t-test	nPV = 6, 4	PV+ IN soma perimeter = 91.42 ± 6.43 µm	p = 0.26
					nSst Group I = 8, 6	Group I Sst+ IN soma perimeter = 79.96 ± 6.95 µm
		H, right	Non-normal distribution	Mann-Whitney U test	nPV = 6, 4	PV+ IN soma area = 463.87 [426.50/615.37] µm2	p = 0.28
					nSst Group I = 8, 6	Group I Sst+ IN soma area = 320.68 [287.76/663.36] µm2
		I, first	Normal distribution	Unpaired t-test	nPV = 6, 4	PV+ IN dendrite branchpoints = 21.67 ± 4.05	p = 0.40
					nSst Group I = 8, 6	Group I Sst+ IN dendrite branchpoints = 26.00 ± 3.11
		I, second	Normal distribution	Unpaired t-test	nPV = 6, 4	PV+ IN dendrite endpoints = 26.17 ± 4.18	p = 0.30
					nSst Group I = 8, 6	Group I Sst+ IN dendrite endpoints = 32.13± 3.53
		I, third	Normal distribution	Unpaired t-test	nPV = 6, 4	PV+ IN dendrite length = 3,911.09 ± 797.02 µm	p = 0.97
					nSst Group I = 8, 6	Group I Sst+ IN dendrite length = 3,952.67 ± 598.47 µm
		I, fourth	Non-normal distribution	Mann-Whitney U test	nPV = 6, 4	PV+ IN dendrite surface area = 1.75 × 104 [1.06 × 104/1.97 × 104] µm2	p = 0.95
					nSst Group I = 8, 6	Group I Sst+ IN dendrite surface area = 1.56 × 104 [1.29 × 104/2.99 × 104] µm2
