# Supplementary material for: Cell-type-specific control of basolateral amygdala neuronal circuits via entorhinal cortex-driven feedforward inhibition
Source: eLife. 2020 Jan 9;9:e50601. doi: 10.7554/eLife.50601 (PMC6984813; doi:10.7554/eLife.50601)
Supplement: Figure 3—source data 3. [file elife-50601-fig3-data3.xlsx]

## Sheet: Raw Data
cell	responding in min stim experiment	used in current clamp firing experiment	cell index	wards class	mem resistance	max fr	delta ahp	sag	halfwidth	ahp magnitude	ahp latency	ap threshold	fr accom	ap amp accom	latency to first ap	ap broadening	ap amp	number rebound ap	membrane tau
317171	NA	NA	1	2	208.471	74.7384	7.8247	30.52	0.54	17.6648	1.84	-38.4033	0.3148	0.7124	95.3	1	74.0381	5	20.7435
3171710	NA	NA	2	1	121.813	124.352	2.6001	10.8834	0.35	21.8964	3.45	-33.2153	1.4799	1.11	366.2	1.3333	56.4301	2	10.0515
317172	NA	NA	3	1	280.488	81.9672	6.3293	13.2888	0.7167	16.9749	16.45	-31.8115	0.3838	0.8055	36.4	1.1667	40.3341	6	22.2353
317173	NA	NA	4	1	176.073	196.375	-0.3113	7.1578	0.4	16.7297	2	-29.2114	0.2414	0.9817	85	1.3333	46.3196	1	12.0786
317174	NA	NA	5	2	212.6	86.2069	2.6428	22.6886	0.7	22.2791	3.54	-31.5442	0.5915	0.8801	84.2	0.8571	38.2349	5	17.186
317175	NA	NA	6	2	312.615	50.9424	1.5747	12.2154	0.5	27.1698	1.95	-33.194	0.4117	0.8132	38.9	1	69.9799	2	25.0622
317176	NA	NA	7	1	464.062	124.938	4.834	4.2378	0.6667	21.7102	3.2	-29.895	0.6625	0.8885	74	1.2	39.1642	3	13.7093
317177	NA	NA	8	2	243.359	36.7085	2.3926	12.6343	0.4	26.2878	1.7	-29.071	0.1998	0.9522	66.1	1	74.3164	1	17.0893
317178	NA	NA	9	2	288.983	95.0475	3.5339	26.4133	0.7	18.9453	27.8	-35.7239	0.6209	0.8671	92.2	1.1429	49.4232	2	12.8957
317179	NA	NA	10	1	176.799	149.254	2.2156	5.3807	0.3333	22.9513	2.8833	-35.1644	1.0148	0.9941	87.7	1	53.8401	6	17.0479
512161	y	NA	11	1	177.82	142.93	3.3081	4.3761	0.4571	19.2932	2.5857	-36.3072	0.9041	0.6405	80.2	1.25	45.1695	7	10.5766
512162	n	NA	12	2	217.825	65.1956	1.5869	12.4667	0.42	26.3684	1.74	-28.5864	0.5736	1.0607	70.4	1	59.8499	5	24.0335
512163	y	NA	13	1	230.255	133.197	3.1921	2.7456	0.6333	13.7146	8.4	-37.2681	0.6544	0.8779	208.1	1.2	30.7027	3	15.7335
512164	n	NA	14	2	326.226	91.0834	2.2461	14.7095	0.7	25.119	9.4	-33.0139	0.5594	0.8246	89.4	1	54.5212	4	18.5351
512165	n	NA	15	2	288.539	54.4554	2.0142	10.4449	0.4	27.5879	2.2	-31.4148	0.5209	0.8552	107	1	60.5042	1	14.8858
512166	NA	NA	16	2	310.178	75.8342	10.9131	5.2188	0.7857	20.4084	7.9714	-29.6483	0.8052	0.69	80.8	1.1667	51.1448	7	10.3829
726172	NA	NA	17	2	191.178	72.2022	0.9949	0.9528	1.3	9.2041	36.5	-29.2603	0.7729	0.9201	525.2	1	30.9509	1	13.5015
726174	NA	NA	18	1	140.169	111.058	4.303	5.4299	0.4	20.9106	3.3	-40.8936	0.8746	0.7528	6.8	1.25	44.458	1	10.4859
726175	NA	NA	19	2	200.112	16.5426	-2.7283	6.5294	1.25	18.6523	33.55	-26.1078	0.4162	0.8008	72.1	1.1667	48.2971	2	19.5268
727171	NA	NA	20	1	204.492	107.088	3.1189	8.9641	0.425	26.0101	10.575	-28.5568	0.7758	0.8566	79	1	46.1319	4	16.252
727172	NA	NA	21	2	303.83	77.6322	4.7546	26.7267	0.8	17.3096	15.3	-32.3812	0.4825	0.7761	115.1	1	49.1089	3	29.0633
727173	NA	NA	22	1	128.163	31.746	2.2034	1.3757	0.5	8.3679	3.2	-47.9675	0.3175	0.8398	4	1	52.8503	1	10.22
8101601	NA	NA	23	1	321.04	116.845	2.5635	3.779	0.5667	18.7236	6.1667	-25.5066	0.7887	0.8902	135.1	1	33.0872	3	11.2218
8101602	n	NA	24	1	122.857	94.5274	5.4932	5.7323	0.625	25.1953	2.7429	-36.9293	0.4284	0.7796	83.3	1.2	45.3178	8	16.642
8101603	NA	NA	25	2	332.299	30.785	8.3252	8.0458	0.85	15.062	2.55	-28.9352	0.0945	0.5282	142.3	1	56.8161	4	24.2196
8101604	n	NA	26	2	291.813	57.7756	2.8381	27.8021	0.75	23.6191	3.15	-36.3174	0.5296	0.8953	85.1	1	64.3936	4	17.0679
8101605	n	NA	27	2	150.505	24.3072	-4.3823	15.4908	0.8333	14.7888	51.1	-38.7716	0.5318	0.9405	173.1	1.125	84.4991	3	29.3811
8101606	n	NA	28	2	307.743	104.167	2.7588	30.525	0.6	23.6837	2.8333	-33.6161	0.59	0.981	130.3	1	59.5072	3	20.5403
8101607	NA	NA	29	2	476.141	87.9765	3.6316	5.9845	0.55	26.3	11.1	-32.9132	0.7314	0.9404	187.8	1	56.4606	2	19.3413
8101608	n	NA	30	2	241.528	70.8215	1.8738	26.9504	0.7	19.5435	3.4	-36.322	0.3077	0.9157	178.4	1.1429	68.3838	1	19.7639
8101609	NA	NA	31	1	367.57	80.9909	5.1392	11.5305	0.8333	17.8446	6.3833	-33.2621	0.3424	0.8106	64.6	1.1429	46.0286	6	18.7905
8101610	NA	NA	32	2	485.065	74.813	2.7649	12.2809	0.6	26.7212	2.8	-33.3801	0.5752	0.8774	241.4	1	54.6631	1	18.5391
8101611	y	NA	33	1	201.329	194.126	0.3906	2.8213	0.4333	12.7889	14.0667	-37.1684	0.69	0.9618	158.8	1	63.9221	3	8.8505
8101612	NA	NA	34	1	237.465	113.227	2.6794	5.8882	0.6	21.9349	5.5182	-33.9711	1.0586	1.0084	77.6	0.8333	50.0072	11	9.8131
8101613	y	NA	35	1	222.151	107.474	2.8625	6.8961	0.475	29.5822	3.225	-32.6706	1.0596	0.9262	88.1	1.25	52.2537	4	9.7436
812161	NA	NA	36	1	274.991	53.2688	6.3721	5.8412	1	18.1549	7.95	-35.9528	1.4359	1.0218	107.1	1.4286	48.6481	2	7.2043
812162	n	NA	37	2	329.957	77.0342	4.9438	17.6194	0.8625	14.2448	4.0125	-39.1365	0.5585	0.8571	53.9	1	50.0351	8	30.0348
812163	y	NA	38	2	436.465	97.4659	3.8879	25.7165	0.65	18.1458	6.55	-39.4104	0.5093	0.751	79.6	1	48.9746	2	11.1866
812164	n	NA	39	2	232.539	65.1303	3.8086	18.7601	0.8	15.3971	11.5667	-34.9467	0.2714	0.8457	99.2	1.1429	66.7216	3	16.0389
812165	y	NA	40	1	181.888	177.515	1.7212	3.404	0.4	14.4958	2	-39.9292	6.5012	1.0534	103.4	1	53.3813	1	11.0652
812166	NA	NA	41	2	382.01	58.5938	2.3804	4.6823	0.88	16.9189	19	-30	0.3871	0.9994	146.1	1	45.1209	5	28.4733
812167	n	NA	42	2	340.693	64.2292	6.7871	13.37	0.8154	15.909	2.5615	-34.6177	0.2786	0.8503	103.7	1.1429	69.8946	13	27.2839
812168	NA	NA	43	1	146.422	99.7009	1.8066	7.9568	0.4333	18.2281	2.25	-45.1965	1.176	0.9529	245.6	1.25	64.7054	3	11.3919
831161	y	NA	44	1	177.022	149.85	2.7222	1.8277	0.45	27.7659	1.8833	-37.8866	0.8123	0.8581	4.8	1	42.042	6	13.8004
831162	NA	NA	45	2	212.234	78.4929	5.481	27.2455	0.75	27.681	5.275	-35.2966	0.7126	0.7583	83.9	1	48.0896	4	21.8798
831163	NA	NA	46	1	186.854	119.107	3.2166	3.2959	0.5786	23.8382	2.3643	-36.9768	0.7326	0.7549	8.3	0.8333	31.7928	14	16.1113
831164	n	NA	47	2	260.49	67.4049	5.9814	16.4506	0.875	14.5691	16.4	-39.4836	0.6181	0.765	65.8	1.125	51.3443	4	17.5754
831165	n	NA	48	1	347.173	104.058	3.8269	4.5357	0.5	23.0591	2.4	-45.2637	0.7749	0.8106	9.7	1.1667	53.0151	1	20.3705
831166	n	NA	49	2	305.685	42.7757	7.0251	24.9109	0.8667	35.5428	4.4667	-26.6846	0.804	0.6436	50.4	1.2857	39.6667	3	16.462
831167	n	NA	50	2	292.997	31.1203	3.8574	33.004	0.7	12.1155	2.9	-49.6399	0.152	0.7023	61.5	1.2857	76.648	1	18.7278
921161	y	NA	51	1	287.554	153.011	2.8625	3.1406	0.5	21.3216	3.5667	-32.4646	1.0455	1.1692	424.2	1	37.7401	3	12.5025
921162	y	NA	52	2	215.869	79.2812	9.7534	6.232	0.6833	16.311	7.7	-28.9836	0.2422	0.4102	61.7	1.4	52.6072	6	13.3701
921163	n	NA	53	2	321.841	72.6392	-3.2654	11.9064	1.3875	6.3606	12.175	-36.0619	0.0924	0.9015	44.9	1.5556	58.6746	8	13.4758
921164	n	NA	54	2	583.705	72.2394	6.9397	35.3064	1.425	11.4025	14.9909	-35.7371	0.3767	0.7339	12.9	1.1667	29.717	12	38.3896
921165	NA	NA	55	1	125.019	85.7287	0.6592	1.8143	0.425	24.1974	2.5	-20.99	0.6543	1.1217	137.7	0.8	36.4899	4	12.4611
921166	y	NA	56	1	172.069	99.6512	1.7822	5.9018	0.5667	21.7468	4.2	-39.6545	0.9232	0.9099	79.8	1.4	37.5956	3	11.3649
930161	y	NA	57	1	142.233	110.608	1.3977	4.3819	0.5	17.4011	3.8	-33.7585	0.4437	0.893	357.4	1.2	51.5808	1	15.9895
930163	n	NA	58	2	261.283	73.3368	3.1006	24.9825	0.9	12.3077	19.925	-25.343	0.1869	0.8782	109.3	1	45.8154	5	29.8385
930164	y	NA	59	1	225.401	129.805	3.2715	4.6553	0.7	15.2806	8.2429	-51.9828	0.8991	0.7757	64.1	1.1667	45.711	7	14.499
930165	y	NA	60	1	180.57	111.902	2.3315	5.3015	0.45	25.7782	3.05	-29.1718	0.646	0.9733	195.5	1	41.5497	2	26.0218
930166	n	NA	61	2	273.674	64.4202	2.771	10.964	0.65	21.9025	22.6	-37.4542	0.7483	0.8824	167.2	1	52.8839	2	26.0734
1005161	y	NA	62	1	156.944	172.501	4.2053	2.6414	0.5	13.9832	4.7	-45.282	1.7436	0.9267	284.7	1	27.7466	1	13.487
1107162	NA	y	63	1	157.962	74.9251	0.6104	12.4342	0.5	20.1172	2.9	-32.2205	0.3441	0.8882	83.1	1.25	46.8079	1	19.076
1107163	NA	y	64	1	99.4093	129.096	1.4221	13.7606	0.5	14.978	3.2	-36.5601	0.6541	0.9622	520.3	1.25	41.5466	1	16.4443
1107164	NA	NA	65	2	353.493	117.527	1.0437	2.3857	0.9	11.5295	28.1	-42.0959	0.3766	0.8633	261.6	1.1	17.7063	1	26.5191
1107165	NA	y	66	1	133.653	145.363	2.3621	5.0429	0.4	15.6921	1.8	-41.0767	0.9657	0.8726	153.4	1	55.9814	1	10.7508
1107166	NA	NA	67	1	92.8335	162.354	3.6804	7.6476	0.5	15.7145	2.6	-39.3046	0.6704	0.7959	6.9	1	46.3053	3	12.6293
1107167	NA	y	68	1	103.1	179.395	1.6479	4.1539	0.4	15.7837	1.8	-46.7834	0.7216	0.7285	10.5	1	56.4026	1	10.2333
14937111	y	NA	69	1	172.376	157.52	2.9358	3.8574	0.4222	17.5308	1.8375	-35.3889	0.6479	0.9369	132.2	1	58.8392	9	9.2379
14937113	y	NA	70	1	151.844	158.809	2.1301	2.1885	0.425	16.3086	2.5	-36.3419	0.7813	0.9144	147.3	1	58.7845	4	8.4794
14937114	NA	NA	71	1	86.8885	126.646	3.2654	2.5249	0.4	17.5293	3.5	-35.8704	0.6622	0.9651	328	1	46.8445	1	9.6545
14937115	NA	NA	72	1	126.739	162.107	2.7222	2.3025	0.46	15.0574	2.84	-32.2217	0.6263	0.9462	90.7	1	44.082	5	8.7156
16755701	NA	y	73	1	222.638	166.331	4.3518	2.6412	0.5	21.8719	4.45	-44.4946	1.3322	1.003	222.4	1	41.3025	2	9.2231
16755702	NA	y	74	2	115.24	86.2069	1.9287	19.6372	0.7	17.7307	2.75	-42.273	0.748	0.9645	260.5	1	63.2782	2	37.0599
16755711	NA	NA	75	2	145.196	31.1249	1.3245	2.8781	0.98	18.2019	27.88	-40.5994	0.6072	0.7393	61.3	1.3333	65.3064	5	29.9928
16755712	NA	NA	76	2	365.083	44.6872	5.3955	16.6943	0.9	15.6464	3.1	-36.5265	0.1599	0.7053	33.8	1	60.376	2	33.817
16755713	NA	y	77	1	83.653	106.383	1.1475	4.5983	0.5	20.99	3.9	-39.9231	0.1298	0.7964	484.6	1	49.1089	1	10.776
16755714	NA	NA	78	2	266.757	51.0441	7.5195	27.8736	0.76	13.1714	2.7	-34.895	0.4393	0.7543	119.1	1.1429	58.1885	5	18.4663
16755715	NA	y	79	1	204.582	122.489	4.1016	6.8908	0.575	20.6772	4.525	-32.4539	0.7761	0.7646	50.7	1	30.2979	4	14.387
1811291	NA	NA	80	1	280.862	168.625	2.5513	2.9006	0.4667	21.8384	3	-36.7533	0.7876	0.8544	192.6	1	49.3835	3	9.6073
1811292	NA	NA	81	2	398.715	70.9891	3.595	24.068	0.55	25.4272	3.05	-34.3994	0.8754	0.8092	23	1	60.6506	2	23.6205
1811293	NA	NA	82	1	160.181	109.181	1.1597	4.4462	0.5	22.7386	2.05	-27.8809	0.6446	0.9892	128.6	1	43.9056	2	12.283
1812281	NA	NA	83	1	352.166	146.628	1.6602	8.1136	0.5	22.7905	3.7	-33.2947	0.678	0.9869	130.7	0.8	50.2747	1	9.5321
1812282	NA	NA	84	1	304.111	103.252	2.1118	2.1346	0.6	19.873	2.5	-45.1477	0.1129	0.8486	34.8	1	55.5908	1	29.5698
1812283	NA	NA	85	1	202.701	156.25	4.9683	3.819	0.5167	25.8036	3.4667	-28.4424	0.8387	0.828	77.9	1.25	37.6892	6	6.8974
1901102	NA	NA	86	1	230.369	77.1828	4.7302	3.8159	0.6	20.5139	6.55	-30.8319	0.5516	0.6649	67.9	1.1667	44.0643	2	24.1132
1901103	NA	NA	87	2	248.093	59.3472	1.7639	23.1878	0.7	21.17	9.3	-35.1685	0.3946	0.9101	161.9	1	63.3148	2	16.6638
1901104	NA	NA	88	2	305.331	61.0902	1.0071	9.6073	0.6	24.5728	13.7	-29.8645	0.6687	0.8879	112.4	1	48.8647	1	24.9263
1901171	NA	NA	89	1	89.5103	112.763	1.1719	3.6075	0.4	20.4651	1.9	-29.8096	0.4464	0.8216	81.3	1	40.1611	1	7.7965
1901172	NA	NA	90	2	421.799	70.1754	-3.4241	12.4101	1.23	11.9968	12.4333	-35.2197	0.2879	0.8125	59.1	1.3	57.478	10	13.1466
1901173	NA	NA	91	1	326.745	95.9112	1.0376	6.5968	0.55	27.2614	4.3	-33.5083	0.7446	0.9311	65.7	1	44.8456	2	13.6432
1902081	NA	NA	92	1	143.386	97.4659	1.5808	7.1943	0.55	22.29	2.7	-35.5438	0.8416	0.7898	13.8	1.25	49.9268	2	7.3424
1902083	NA	NA	93	1	115.633	126.263	0.8362	1.9909	0.4	22.0195	2.45	-30.9642	0.6719	0.9894	70.1	0.75	46.6227	6	7.7492
1902084	NA	NA	94	2	245.119	87.5912	2.6978	20.6477	0.54	23.2376	16.65	-31.0266	0.5253	0.8364	57.7	1	64.989	5	13.0717
1902121	NA	NA	95	1	186.631	21.7391	3.2104	3.6429	0.5	18.1274	1.8	-40.8691	0.387	0.85	5.6	1.25	69.9707	1	24.8242
1902122	NA	NA	96	1	111.065	108.965	0.769	7.3375	0.5	20.0256	4.2	-31.488	0.8652	0.8423	253.3	1	41.9739	1	8.4014
1902123	NA	NA	97	1	94.3352	81.0948	3.9917	3.5447	0.5	24.2496	1.9	-29.1638	0.9333	0.7233	4.1	1	39.9561	20	8.5578
1902124	NA	NA	98	1	397.572	86.5801	4.6082	10.1349	0.675	19.7426	3.8375	-33.4213	0.6914	0.805	25.5	1	50.7996	8	15.357
1902201	NA	NA	99	2	456.809	59.1716	4.95	6.2397	0.65	21.3684	6.8	-39.1754	0.8169	0.7932	25.3	1.1667	64.2975	2	15.3473
1902202	NA	NA	100	1	303.12	99.7506	4.8889	10.0633	0.55	22.3145	2.4	-34.0454	0.2573	0.8039	21.2	1.2	51.9257	2	23.1516
1902203	NA	NA	101	1	338.411	58.1677	6.1829	5.6835	0.8	23.1674	5.85	-34.4284	0.6518	0.7149	84.3	1.1429	40.152	4	25.1311
1902204	NA	NA	102	1	197.329	167.173	2.8931	2.9937	0.6	18.9636	5.5667	-36.1104	0.6752	0.9235	118.5	1.2	53.2979	3	8.318
1903011	NA	NA	103	1	400.742	167.57	2.0508	2.5081	0.6	17.041	2.2	-42.1631	0.2847	0.8542	238.3	1.2	59.8511	1	13.9581
1903012	NA	NA	104	1	310.859	115.551	4.7485	4.0166	0.6	20.9717	5.3	-35.0952	0.496	0.7375	536.7	1.2	43.2373	1	8.5392
1903013	NA	NA	105	2	194.233	73.3855	3.4119	18.7163	0.5	24.2655	2.0333	-34.8307	0.7714	0.8326	59	1	69.4295	3	19.7238
			# Group 1	60
			# Group 2	45

## Sheet: z scores
cell	responding in min stim experiment	used in current clamp firing experiment	cell index	wards class	mem resistance	max fr	delta ahp	sag	halfwidth	ahp magnitude	ahp latency	ap threshold	fr accom	ap amp accom	latency to first ap	ap broadening	ap amp	number rebound ap	membrane tau
317171	NA	NA	1	2	-0.3531	-0.5552	1.9799	2.3411	-0.4052	-0.423	-0.6299	-0.5914	-0.5677	-1.2386	-0.2482	-0.604	1.9963	0.4023	0.5593
3171710	NA	NA	2	1	-1.1937	0.6378	-0.1979	0.0672	-1.2703	0.426	-0.4364	0.359	1.2353	2.1642	2.1192	1.7285	0.478	-0.5295	-0.932
317172	NA	NA	3	1	0.3454	-0.3814	1.3566	0.3457	0.3992	-0.5614	1.1256	0.6162	-0.4609	-0.4416	-0.7629	0.5623	-0.9099	0.713	0.7674
317173	NA	NA	4	1	-0.6674	2.3696	-1.4114	-0.3643	-1.0426	-0.6106	-0.6107	1.0924	-0.6812	1.066	-0.3382	1.7285	-0.3938	-0.8402	-0.6493
317174	NA	NA	5	2	-0.3131	-0.2795	-0.1801	1.4342	0.3233	0.5028	-0.4256	0.6651	-0.1395	0.1963	-0.3452	-1.6036	-1.091	0.4023	0.0631
317175	NA	NA	6	2	0.657	-1.1274	-0.6253	0.2214	-0.5873	1.4841	-0.6167	0.3629	-0.4178	-0.3754	-0.741	-0.604	1.6464	-0.5295	1.1617
317176	NA	NA	7	1	2.1259	0.6518	0.7333	-0.7024	0.1715	0.3887	-0.4665	0.9672	-0.0297	0.2683	-0.4343	0.7955	-1.0108	-0.2189	-0.4218
317177	NA	NA	8	2	-0.0148	-1.4697	-0.2844	0.2699	-1.0426	1.3071	-0.6467	1.1182	-0.7457	0.8142	-0.5033	-0.604	2.0203	-0.8402	0.0496
317178	NA	NA	9	2	0.4278	-0.0669	0.1914	1.8655	0.3233	-0.1661	2.4894	-0.1005	-0.0941	0.0854	-0.2752	0.3957	-0.1262	-0.5295	-0.5353
317179	NA	NA	10	1	-0.6604	1.2365	-0.3581	-0.5701	-1.3462	0.6377	-0.5045	0.002	0.5155	1.1725	-0.3146	-0.604	0.2547	0.713	0.0438
512161	y	NA	11	1	-0.6504	1.0845	0.0973	-0.6864	-0.7825	-0.0963	-0.5403	-0.2074	0.3441	-1.8535	-0.3801	1.1454	-0.493	1.0236	-0.8588
512162	n	NA	12	2	-0.2624	-0.7847	-0.6202	0.2505	-0.9516	1.3233	-0.6419	1.2069	-0.1672	1.7423	-0.4657	-0.604	0.7729	0.4023	1.0182
512163	y	NA	13	1	-0.1419	0.8504	0.0489	-0.8752	0.0198	-1.2155	0.1584	-0.3834	-0.0422	0.178	0.7376	0.7955	-1.7404	-0.2189	-0.1395
512164	n	NA	14	2	0.789	-0.1622	-0.3454	0.5102	0.3233	1.0726	0.2785	0.3959	-0.1891	-0.2784	-0.2997	-0.604	0.3134	0.0917	0.2513
512165	n	NA	15	2	0.4235	-1.043	-0.4421	0.0164	-1.0426	1.5679	-0.5866	0.6888	-0.2488	-0.0167	-0.1459	-0.604	0.8293	-0.8402	-0.2577
512166	NA	NA	16	2	0.6334	-0.5289	3.2673	-0.5888	0.7136	0.1275	0.1069	1.0124	0.1912	-1.4299	-0.3749	0.5623	0.0223	1.0236	-0.8858
726172	NA	NA	17	2	-0.5209	-0.6162	-0.867	-1.0828	3.0552	-2.1205	3.5348	1.0835	0.1411	0.5389	3.5087	-0.604	-1.719	-0.8402	-0.4508
726174	NA	NA	18	1	-1.0156	0.3181	0.512	-0.5644	-1.0426	0.2282	-0.4544	-1.0475	0.2986	-0.8927	-1.0215	1.1454	-0.5543	-0.8402	-0.8714
726175	NA	NA	19	2	-0.4342	-1.9546	-2.4189	-0.437	2.8276	-0.2249	3.1803	1.661	-0.4108	-0.4817	-0.4509	0.5623	-0.2233	-0.5295	0.3896
727171	NA	NA	20	1	-0.3917	0.2226	0.0184	-0.1551	-0.9288	1.2514	0.4197	1.2124	0.1456	-0.004	-0.3906	-0.604	-0.41	0.0917	-0.0672
727172	NA	NA	21	2	0.5718	-0.4857	0.7002	1.9018	0.7786	-0.4943	0.9874	0.5118	-0.3082	-0.6929	-0.0751	-0.604	-0.1533	-0.2189	1.7197
727173	NA	NA	22	1	-1.1321	-1.589	-0.3632	-1.0338	-0.5873	-2.2883	-0.4665	-2.3434	-0.5636	-0.1483	-1.046	-0.604	0.1693	-0.8402	-0.9085
8101601	NA	NA	23	1	0.7387	0.4572	-0.2131	-0.7555	-0.2838	-0.2106	-0.11	1.7711	0.1656	0.2836	0.0997	-0.604	-1.5348	-0.2189	-0.7688
8101602	n	NA	24	1	-1.1836	-0.0794	1.0081	-0.5293	-0.0182	1.0879	-0.5214	-0.3213	-0.3919	-0.6633	-0.353	0.7955	-0.4802	1.3342	-0.0128
8101603	NA	NA	25	2	0.8479	-1.6121	2.1886	-0.2614	1.0063	-0.9452	-0.5446	1.143	-0.9085	-2.8148	0.1626	-0.604	0.5113	0.0917	1.0441
8101604	n	NA	26	2	0.4552	-0.9631	-0.0986	2.0263	0.551	0.7717	-0.4725	-0.2093	-0.2353	0.3264	-0.3373	-0.604	1.1647	0.0917	0.0466
8101605	n	NA	27	2	-0.9154	-1.7679	-3.1084	0.6007	0.9304	-1	5.2891	-0.6588	-0.232	0.7141	0.4317	0.2707	2.8983	-0.2189	1.7641
8101606	n	NA	28	2	0.6097	0.1524	-0.1317	2.3416	-0.132	0.7846	-0.5105	0.2856	-0.1418	1.0598	0.0577	-0.604	0.7433	-0.2189	0.5309
8101607	NA	NA	29	2	2.2431	-0.2369	0.2321	-0.5001	-0.3597	1.3095	0.4828	0.4143	0.0769	0.7126	0.5602	-0.604	0.4806	-0.5295	0.3637
8101608	n	NA	30	2	-0.0325	-0.6494	-0.5006	1.9277	0.3233	-0.0461	-0.4424	-0.2101	-0.5787	0.5016	0.4781	0.3957	1.5087	-0.8402	0.4227
8101609	NA	NA	31	1	1.19	-0.4049	0.8605	0.1421	0.9304	-0.3869	-0.084	0.3504	-0.5249	-0.3978	-0.5164	0.3957	-0.4189	0.713	0.2869
8101610	NA	NA	32	2	2.3297	-0.5534	-0.1292	0.229	-0.132	1.394	-0.5145	0.3288	-0.1647	0.1733	1.0286	-0.604	0.3256	-0.8402	0.2518
8101611	y	NA	33	1	-0.4224	2.3155	-1.1189	-0.8664	-0.8909	-1.4013	0.8392	-0.3651	0.0129	0.8956	0.3068	-0.604	1.124	-0.2189	-1.0995
8101612	NA	NA	34	1	-0.0719	0.3702	-0.1648	-0.5113	-0.132	0.4338	-0.1879	0.2206	0.5833	1.2946	-0.4028	-1.7702	-0.0758	2.2661	-0.9653
8101613	y	NA	35	1	-0.2205	0.2319	-0.0885	-0.3946	-0.7011	1.9681	-0.4635	0.4588	0.5848	0.5912	-0.3111	1.1454	0.1179	0.0917	-0.9749
812161	NA	NA	36	1	0.2921	-1.0715	1.3744	-0.5167	1.6893	-0.3247	0.1043	-0.1425	1.1671	1.4093	-0.145	2.3949	-0.193	-0.5295	-1.3291
812162	n	NA	37	2	0.8252	-0.5	0.7791	0.8472	1.0632	-1.1092	-0.3688	-0.7257	-0.1906	0.0003	-0.6099	-0.604	-0.0734	1.3342	1.8552
812163	y	NA	38	2	1.8583	-0.0087	0.339	1.7848	0.0957	-0.3265	-0.0639	-0.7758	-0.2668	-0.9077	-0.3854	-0.604	-0.1649	-0.5295	-0.7737
812164	n	NA	39	2	-0.1197	-0.7863	0.3059	0.9793	0.7786	-0.878	0.5389	0.0418	-0.6348	-0.0977	-0.2141	0.3957	1.3654	-0.2189	-0.0969
812165	y	NA	40	1	-0.611	1.9161	-0.5642	-0.799	-1.0426	-1.0588	-0.6107	-0.8709	9.0053	1.6798	-0.1774	-0.604	0.2151	-0.8402	-0.7906
812166	NA	NA	41	2	1.3301	-0.9434	-0.2895	-0.6509	1.1429	-0.5726	1.432	0.948	-0.4559	1.2179	0.1958	-0.604	-0.4972	0.4023	1.6374
812167	n	NA	42	2	0.9293	-0.8079	1.5474	0.3551	0.8487	-0.7753	-0.5432	0.1021	-0.6238	-0.0581	-0.1747	0.3957	1.639	2.8873	1.4715
812168	NA	NA	43	1	-0.955	0.045	-0.5286	-0.2717	-0.8909	-0.31	-0.5806	-1.8358	0.765	0.8199	1.0653	1.1454	1.1916	-0.2189	-0.745
831161	y	NA	44	1	-0.6582	1.2509	-0.147	-0.9815	-0.815	1.6037	-0.6247	-0.4967	0.2021	0.0089	-1.039	-0.604	-0.7627	0.713	-0.4091
831162	NA	NA	45	2	-0.3166	-0.465	1.003	1.9619	0.551	1.5866	-0.2171	-0.0223	0.0478	-0.8459	-0.3478	-0.604	-0.2412	0.0917	0.7178
831163	NA	NA	46	1	-0.5628	0.5116	0.0591	-0.8115	-0.2296	0.8156	-0.5669	-0.33	0.0788	-0.8744	-1.0084	-1.7702	-1.6464	3.198	-0.0868
831164	n	NA	47	2	0.1514	-0.7316	1.2116	0.7118	1.1201	-1.0441	1.1196	-0.7893	-0.0984	-0.7878	-0.5059	0.2707	0.0394	0.0917	0.1174
831165	n	NA	48	1	0.9922	0.1498	0.3135	-0.6679	-0.5873	0.6593	-0.5626	-1.8481	0.1443	-0.3981	-0.9962	0.5623	0.1835	-0.8402	0.5073
831166	n	NA	49	2	0.5898	-1.3238	1.6467	1.6915	1.0822	3.164	-0.3143	1.5553	0.1893	-1.8274	-0.6405	1.3953	-0.9675	-0.2189	-0.0379
831167	n	NA	50	2	0.4667	-1.6041	0.3262	2.6287	0.3233	-1.5364	-0.5025	-2.6497	-0.8196	-1.3245	-0.5435	1.3953	2.2213	-0.8402	0.2782
921161	y	NA	51	1	0.4139	1.3269	-0.0885	-0.8295	-0.5873	0.3107	-0.4224	0.4965	0.5629	2.6712	2.6261	-0.604	-1.1336	-0.2189	-0.5901
921162	y	NA	52	2	-0.2814	-0.446	2.7839	-0.4715	0.2474	-0.6946	0.0742	1.1342	-0.68	-3.8242	-0.5418	2.195	0.1483	0.713	-0.4691
921163	n	NA	53	2	0.7465	-0.6057	-2.6428	0.1856	3.4536	-2.691	0.6119	-0.1624	-0.9119	0.3797	-0.6886	3.2835	0.6715	1.3342	-0.4544
921164	n	NA	54	2	3.2864	-0.6153	1.611	2.8953	3.6244	-1.6794	0.9503	-0.1029	-0.4719	-1.0542	-0.9682	0.5623	-1.8254	2.5767	3.0205
921165	NA	NA	55	1	-1.1626	-0.291	-1.0069	-0.983	-0.9288	0.8877	-0.5506	2.5985	-0.0424	2.2639	0.1224	-2.0035	-1.2414	0.0917	-0.5959
921166	y	NA	56	1	-0.7062	0.0438	-0.5388	-0.5097	-0.2838	0.396	-0.3463	-0.8206	0.3737	0.4516	-0.3836	2.195	-1.1461	-0.2189	-0.7488
930161	y	NA	57	1	-0.9956	0.3073	-0.6991	-0.6857	-0.5873	-0.4759	-0.3944	0.2595	-0.3682	0.3071	2.0423	0.7955	0.0598	-0.8402	-0.1038
930163	n	NA	58	2	0.1591	-0.5889	0.0108	1.6998	1.234	-1.4978	1.5432	1.8011	-0.7657	0.1803	-0.1258	-0.604	-0.4373	0.4023	1.8278
930164	y	NA	59	1	-0.1889	0.7689	0.082	-0.6541	0.3233	-0.9013	0.1395	-3.0789	0.3364	-0.6969	-0.5208	0.5623	-0.4463	1.0236	-0.3117
930165	y	NA	60	1	-0.6238	0.3384	-0.3098	-0.5792	-0.815	1.2048	-0.4845	1.0997	-0.0551	0.9944	0.6275	-0.604	-0.8051	-0.5295	1.2955
930166	n	NA	61	2	0.2793	-0.8033	-0.1266	0.0765	0.0957	0.4272	1.8646	-0.4175	0.1031	0.2163	0.3802	-0.604	0.1722	-0.5295	1.3027
1005161	y	NA	62	1	-0.8529	1.7955	0.4713	-0.8873	-0.5873	-1.1617	-0.2862	-1.8514	1.6433	0.5955	1.407	-0.604	-1.9953	-0.8402	-0.4528
1107162	NA	y	63	1	-0.8431	-0.5507	-1.0273	0.2467	-0.5873	0.069	-0.5025	0.5412	-0.5224	0.2661	-0.3548	1.1454	-0.3517	-0.8402	0.3267
1107163	NA	y	64	1	-1.411	0.7518	-0.6889	0.4003	-0.5873	-0.962	-0.4665	-0.2537	-0.0427	0.8992	3.4659	1.1454	-0.8054	-0.8402	-0.0404
1107164	NA	NA	65	2	1.0535	0.4736	-0.8466	-0.9169	1.234	-1.6539	2.5255	-1.2678	-0.472	0.0534	1.2051	0.0958	-2.8611	-0.8402	1.3649
1107165	NA	y	66	1	-1.0788	1.143	-0.2971	-0.6092	-1.0426	-0.8188	-0.6347	-1.0811	0.4395	0.1322	0.2596	-0.604	0.4393	-0.8402	-0.8345
1107166	NA	NA	67	1	-1.4748	1.5515	0.2525	-0.3076	-0.5873	-0.8143	-0.5386	-0.7565	-0.0174	-0.524	-1.0207	-0.604	-0.3951	-0.2189	-0.5725
1107167	NA	y	68	1	-1.3752	1.9613	-0.5948	-0.7121	-1.0426	-0.8004	-0.6347	-2.1265	0.0619	-1.1008	-0.9892	-0.604	0.4756	-0.8402	-0.9066
14937111	y	NA	69	1	-0.7032	1.4353	-0.0579	-0.7465	-0.9415	-0.4499	-0.6302	-0.0392	-0.0523	0.6825	0.0743	-0.604	0.6857	1.6448	-1.0455
14937113	y	NA	70	1	-0.9024	1.4663	-0.3938	-0.9397	-0.9288	-0.6951	-0.5506	-0.2137	0.1542	0.4907	0.2063	-0.604	0.681	0.0917	-1.1513
14937114	NA	NA	71	1	-1.5324	0.6929	0.0795	-0.9007	-1.0426	-0.4502	-0.4304	-0.1274	-0.0302	0.9242	1.7854	-0.604	-0.3486	-0.8402	-0.9874
14937115	NA	NA	72	1	-1.1459	1.5456	-0.147	-0.9265	-0.7694	-0.9461	-0.5097	0.541	-0.0857	0.7624	-0.2884	-0.604	-0.5868	0.4023	-1.1183
16755701	NA	y	73	1	-0.2157	1.6472	0.5323	-0.8873	-0.5873	0.4211	-0.3163	-1.7072	1.0066	1.2488	0.8626	-0.604	-0.8264	-0.5295	-1.0476
16755702	NA	y	74	2	-1.2574	-0.2795	-0.4777	1.0808	0.3233	-0.4098	-0.5205	-1.3002	0.1026	0.9187	1.1955	-0.604	1.0685	-0.5295	2.8351
16755711	NA	NA	75	2	-0.9669	-1.6039	-0.7296	-0.8598	1.5982	-0.3152	2.499	-0.9936	-0.1153	-1.0085	-0.5453	1.7285	1.2434	0.4023	1.8494
16755712	NA	NA	76	2	1.1659	-1.2778	0.9674	0.74	1.234	-0.828	-0.4785	-0.2476	-0.8073	-1.2988	-0.7856	-0.604	0.8182	-0.5295	2.3828
16755713	NA	y	77	1	-1.5638	0.2057	-0.8034	-0.6607	-0.5873	0.2442	-0.3824	-0.8698	-0.854	-0.5197	3.1539	-0.604	-0.1533	-0.8402	-0.8309
16755714	NA	NA	78	2	0.2122	-1.125	1.8527	2.0346	0.5965	-1.3245	-0.5265	0.0513	-0.375	-0.8795	-0.0402	0.3957	0.6296	0.4023	0.2417
16755715	NA	y	79	1	-0.3909	0.593	0.428	-0.3952	-0.2458	0.1814	-0.3073	0.4985	0.1462	-0.7918	-0.6379	-0.604	-1.7754	0.0917	-0.3273
1811291	NA	NA	80	1	0.349	1.7023	-0.2182	-0.8572	-0.7391	0.4144	-0.4905	-0.2891	0.164	-0.0234	0.6021	-0.604	-0.1296	-0.2189	-0.994
1811292	NA	NA	81	2	1.4921	-0.6454	0.2168	1.5939	-0.3597	1.1344	-0.4845	0.1421	0.2999	-0.4101	-0.88	-0.604	0.8419	-0.5295	0.9606
1811293	NA	NA	82	1	-0.8215	0.273	-0.7983	-0.6783	-0.5873	0.595	-0.6046	1.3362	-0.0573	1.13	0.0429	-0.604	-0.602	-0.5295	-0.6208
1812281	NA	NA	83	1	1.0406	1.1734	-0.5897	-0.2536	-0.5873	0.6054	-0.4064	0.3445	-0.0057	1.1104	0.0612	-2.0035	-0.0528	-0.8402	-1.0044
1812282	NA	NA	84	1	0.5745	0.1304	-0.4014	-0.946	-0.132	0.0201	-0.5506	-1.8268	-0.8801	-0.0728	-0.7769	-0.604	0.4056	-0.8402	1.7904
1812283	NA	NA	85	1	-0.4091	1.4048	0.7893	-0.7509	-0.5114	1.2099	-0.4344	1.2333	0.243	-0.2491	-0.4002	1.1454	-1.138	0.713	-1.3719
1901102	NA	NA	86	1	-0.1407	-0.4965	0.6901	-0.7513	-0.132	0.1486	-0.0639	0.7956	-0.2013	-1.645	-0.4876	0.5623	-0.5883	-0.5295	1.0293
1901103	NA	NA	87	2	0.0312	-0.9253	-0.5464	1.492	0.3233	0.2803	0.2665	0.0012	-0.4442	0.4532	0.3339	-0.604	1.0717	-0.5295	-0.0097
1901104	NA	NA	88	2	0.5863	-0.8834	-0.8619	-0.0806	-0.132	0.963	0.7952	0.9728	-0.0201	0.2634	-0.0987	-0.604	-0.1744	-0.8402	1.1427
1901171	NA	NA	89	1	-1.507	0.3591	-0.7932	-0.7754	-1.0426	0.1388	-0.6227	0.9829	-0.364	-0.3038	-0.3705	-0.604	-0.9249	-0.8402	-1.2465
1901172	NA	NA	90	2	1.716	-0.665	-2.709	0.2439	2.7365	-1.5602	0.643	-0.0082	-0.6093	-0.3814	-0.5645	1.4953	0.5684	1.9555	-0.5003
1901173	NA	NA	91	1	0.794	-0.0461	-0.8492	-0.4292	-0.3597	1.5024	-0.3343	0.3053	0.0974	0.6334	-0.5068	-0.604	-0.5209	-0.5295	-0.431
1902081	NA	NA	92	1	-0.9844	-0.0087	-0.6227	-0.36	-0.3597	0.505	-0.5265	-0.0675	0.2475	-0.5764	-0.9604	1.1454	-0.0828	-0.5295	-1.3099
1902083	NA	NA	93	1	-1.2536	0.6837	-0.9331	-0.9626	-1.0426	0.4507	-0.5566	0.7714	-0.0151	1.1323	-0.4684	-2.3533	-0.3677	0.713	-1.2531
1902084	NA	NA	94	2	0.0023	-0.2462	-0.1572	1.1978	-0.4052	0.6951	1.1497	0.7599	-0.2419	-0.1769	-0.5767	-0.604	1.216	0.4023	-0.5107
1902121	NA	NA	95	1	-0.565	-1.8296	0.0566	-0.7713	-0.5873	-0.3302	-0.6347	-1.0431	-0.456	-0.0612	-1.032	1.1454	1.6456	-0.8402	1.1285
1902122	NA	NA	96	1	-1.2979	0.2678	-0.9611	-0.3435	-0.5873	0.0507	-0.3463	0.6754	0.284	-0.1267	1.1326	-0.604	-0.7685	-0.8402	-1.1622
1902123	NA	NA	97	1	-1.4602	-0.4024	0.3822	-0.7827	-0.5873	0.8982	-0.6227	1.1012	0.3894	-1.1448	-1.0451	-0.604	-0.9425	5.0617	-1.1403
1902124	NA	NA	98	1	1.481	-0.2705	0.6392	-0.0195	0.2095	-0.0061	-0.3899	0.3213	0.015	-0.4456	-0.8581	-0.604	-0.0075	1.3342	-0.192
1902201	NA	NA	99	2	2.0556	-0.9295	0.7816	-0.4706	0.0957	0.3201	-0.0339	-0.7328	0.2093	-0.5469	-0.8599	0.5623	1.1564	-0.5295	-0.1933
1902202	NA	NA	100	1	0.5649	0.0462	0.7562	-0.0278	-0.3597	0.5099	-0.5626	0.2069	-0.6567	-0.4554	-0.8957	0.7955	0.0896	-0.5295	0.8952
1902203	NA	NA	101	1	0.9072	-0.9537	1.2956	-0.535	0.7786	0.681	-0.148	0.1368	-0.0462	-1.217	-0.3443	0.3957	-0.9256	0.0917	1.1713
1902204	NA	NA	102	1	-0.4612	1.6674	-0.0757	-0.8465	-0.132	-0.1624	-0.1821	-0.1713	-0.01	0.5685	-0.0454	0.7955	0.2079	-0.2189	-1.1738
1903011	NA	NA	103	1	1.5118	1.677	-0.4268	-0.9027	-0.132	-0.5481	-0.5866	-1.2801	-0.6143	-0.0247	1.0015	0.7955	0.773	-0.8402	-0.3871
1903012	NA	NA	104	1	0.64	0.4261	0.6977	-0.728	-0.132	0.2405	-0.2141	0.0146	-0.2873	-1.0237	3.6092	0.7955	-0.6596	-0.8402	-1.1429
1903013	NA	NA	105	2	-0.4912	-0.5878	0.1405	0.9742	-0.5873	0.9014	-0.6066	0.0631	0.1388	-0.21	-0.5654	-0.604	1.5989	-0.2189	0.4171
			# Group 1	60
			# Group 2	45
