# Supplementary material for: Cell-type-specific control of basolateral amygdala neuronal circuits via entorhinal cortex-driven feedforward inhibition
Source: eLife. 2020 Jan 9;9:e50601. doi: 10.7554/eLife.50601 (PMC6984813; doi:10.7554/eLife.50601)
Supplement: Figure 3—source data 4. [file elife-50601-fig3-data4.xlsx]

## Sheet: Sheet1
Group	mem resistance (MW)	max fr (Hz)	delta ahp (mV)	sag (%)	halfwidth (ms)	ahp magnitude (mV)	ahp latency (ms)	ap threshold (mV)	fr accom	ap amp accom	latency to first ap (ms)	ap broadening	ap amp (mV)	number rebound ap (count)	membrane t (ms)
PV	91.0117	60.0601	1.062	3.7859	0.4	23.2819	2.1	-35.91	0.5116	0.9674	165.6	1	48.7305	0	13.1832
	100.598	113.931	2.7832	8.407	0.5	22.875	2.4167	-42.8569	0.729	0.8343	73.1	1	48.4548	0	13.5375
	188.797	131.323	1.3794	5.4974	0.5	23.9614	3.6833	-38.9949	0.8249	0.8599	40.3	1.25	50.4064	0	10.4231
	266.678	100.604	2.887	6.13	0.7	16.3635	8.2	-38.5803	0.2461	0.8053	189.3	1	46.2891	1	21.6749
	104.571	99.5025	3.2471	3.4974	0.4667	22.8373	2.5	-39.7176	0.8358	0.7473	10	1	46.8994	0	9.8944
	228.073	147.783	1.6968	6.9597	0.6182	18.1724	4.8636	-31.4725	0.564	0.874	49.4	0.8333	35.341	0	15.8407
	293.462	90.0474	5.6519	5.2619	0.9	19.2708	5.7667	-36.7147	0.2072	0.7287	122.4	1.125	36.3729	0	21.3165
	259.866	130.391	0.3601	2.4541	0.5	23.833	2.26	-34.4885	0.8041	1.1229	224.1	0.8	53.6499	0	16.0166
	243.427	155	3.9551	7.3423	0.4	22.6807	1.5	-37.8357	0.7658	0.7302	26.5	1.3333	70.2209	0	13.6025
	243.427	155	3.9551	7.3423	0.4	22.6807	1.5	-37.8357	0.7658	0.7302	26.5	1.3333	70.2209	0	13.6025
	196.331	112.36	1.9897	10.3103	0.5	23.1893	3.1	-41.2292	0.3305	0.8256	124.4	0.8	66.921	0	9.5087
	161.742	95.3337	6.3538	5.176	0.65	20.9503	3	-38.2782	0.9144	0.7739	116.4	1.1667	60.3241	0	16.7304
	216.501	171.198	2.4963	5.2181	0.5	19.0887	1.9	-43.158	0.535	0.8337	8.2	1	69.7128	0	12.364
	165.893	122.449	3.4485	8.7247	0.432	24.039	1.6	-30.8689	0.7349	0.802	15	1.3333	57.9082	0	11.7162
	282.534	60.5755	8.1116	2.8942	0.6	25.8008	3.44	-34.0283	1.0814	0.8385	14.9	1	47.2156	0	11.6606
	147.76	156.803	1.9531	2.1368	0.4857	23.8682	2.6143	-29.9072	0.914	0.9278	92.3	1	31.6868	0	14.6956
	106.025	174.39	1.8127	5.9653	0.33	14.8676	1.5	-37.5128	0.983	0.9891	101.5	1	58.9728	0	10.8764
	232.198	179.015	2.2095	1.2619	0.4	16.6235	2.22	-41.8152	0.64	1.0104	163.3	1	54.6069	0	15.437
	121.181	83.0078	4.657	7.3057	0.5	22.6181	3.075	-29.7287	2.5931	0.7174	137	1.2	46.5103	0	12.2709
	66.4938	2.7663	2.3132	4.1435	0.3	20.5688	1.4	-35.0769	1.8877	0.7706	7.4	1.25	62.5427	0	9.5348
	62.8149	48.9596	0.0061	10.9529	0.4	16.1926	2.6	-33.728	0.5832	1.0717	380.5	1	55.9631	0	10.031
	140.65	122.19	3.9551	11.2009	0.5	23.175	3.1	-27.4902	0.4094	0.8434	416.4	1.25	37.2986	0	14.3841
	104.582	85.389	1.1108	4.7811	0.4	10.7666	3	-33.4106	0.5065	1.085	340.7	0.75	30.481	0	14.1317
	153.324	197.769	0.8362	8.932	0.45	13.2416	2.95	-49.0265	0.5785	0.9051	55.8	1	49.0387	0	9.2843
	149.651	135.61	2.1729	9.4742	0.4	20.4346	3.1	-49.8169	0.5579	0.954	510	0.75	58.3862	0	13.5828
	135.35	91.9775	1.0498	1.5225	0.7	15.6189	5	-27.7161	0.2633	0.8984	448.8	1	28.2227	0	8.816
	77.1039	37.3972	0.7935	6.3365	0.4	18.2068	3.7	-32.8979	0.1319	1.0428	121.7	1	36.1938	0	26.3294
	66.9279	48.2315	1.0376	2.3754	0.4	22.6166	6	-28.6591	0.8397	1.0167	165.5	1	41.3269	0	9.023
	80.3163	143.076	1.2756	4.3952	0.4	17.6605	2.6	-57.0831	0.2137	0.772	172.9	1.25	50.4486	0	22.7661
	76.1443	12.012	-0.647	12.2454	0.4	18.7256	3.6	-19.9402	0.2695	0.9873	318.8	0.8	59.4177	0	7.4587
	50.0381	56.101	0.8789	4.4431	0.3	15.4114	1.8	-46.1365	0.2582	1.042	87	0.75	50.5676	0	9.8956
	116.482	91.8836	0.1282	12.5517	0.5	18.6035	4.3	-30.9753	0.1544	1.1383	125.3	0.8333	36.2915	0	11.2294
	89.6523	71.3194	1.4404	6.445	0.4	19.7327	3.5	-37.0239	0.2543	0.9641	341.7	1	57.0984	0	10.45
	128.306	92.5926	-0.2686	6.3979	0.5	21.8811	3.3	-34.9854	0.9347	1.1591	234.1	1	48.4924	0	18.7386
	147.168	117.016	2.4475	4.3024	0.5	23.2971	3.5	-33.1604	4.5714	0.8668	377.3	1.4	51.3367	0	8.488
	80.5582	10.008	0.1709	8.8372	0.4	22.2351	2.6	-30.7678	0.2046	0.9899	180.5	0.75	56.5979	0	11.2726
	214.243	180.814	5.1697	1.9813	0.44	27.592	3.1444	-36.1658	0.9664	0.8534	160.2	1	52.6373	0	10.0304
	242.679	276.521	1.8921	13.1927	0.2852	16.7861	1.0577	-38.9951	0.8543	0.9923	30.3	1	61.112	3	11.5425
	226.156	185.93	3.1982	4.0674	0.3	28.2593	2.4	-32.0496	0.6942	0.7075	171.5	1	43.0664	0	11.5311
	127.838	100.84	4.4434	5.7448	0.4	27.0874	3.3	-24.762	0.9584	0.7461	202	1	36.4319	0	9.942
	195.445	133.399	2.179	4.6685	0.45	18.6768	4.9	-38.0432	1.4379	0.8761	67.7	1	49.234	0	15.0475
	300.956	152.634	1.6602	7.5287	0.4571	32.0949	3.2143	-32.2893	3.4667	0.8971	87.8	1.25	46.9927	0	10.0978
	100.435	125.754	1.3184	3.2977	0.3	21.0922	1.55	-33.0948	0.698	1.0523	97.8	1	49.0295	0	9.7238
	90.7108	93.9664	3.5217	3.5907	0.34	24.4543	1.84	-27.6697	0.8121	0.7389	243.8	1.3333	39.5215	0	6.3376
	72.2668	80.2005	1.8433	5.0942	0.4	22.2961	2.9667	-31.5308	0.3021	0.8048	60.2	1.3333	43.28	0	9.4964
	309.454	146.27	2.3132	3.8171	0.62	24.8706	4.22	-34.3274	0.8098	0.8616	88.9	1	45.2734	0	10.3837
	213.168	195.072	2.1362	3.5221	0.3	20.0195	1.2	-42.7063	2.6793	0.8823	541.5	1.3333	67.2058	3	14.4694
	83.2095	107.79	0.3906	10.1614	0.25	21.7957	1.2667	-33.11	1.0591	1.0399	513.4	1	49.5483	0	8.5957
	131.878	147.884	3.0579	1.877	0.3	20.4712	1.3	-36.2183	2.2166	0.7201	161.6	1.3333	55.4932	0	10.7523
	203.031	150.905	1.9897	5.6637	0.45	26.4818	3.8	-31.1584	0.7386	0.8527	93.1	1	44.0057	0	7.8543
	242.478	151.822	3.2593	3.8604	0.5	16.6911	6.5667	-43.6747	0.3046	0.8352	147.7	1	64.7949	0	9.7624
	210.416	111.434	2.3071	8.4283	0.5	28.6011	5.1667	-30.8024	0.7476	0.978	319.6	1	46.8018	0	8.34
FS Sst	121.813	124.352	2.6001	10.8834	0.35	21.8964	3.45	-33.2153	1.4799	1.11	366.2	1.3333	56.4301	0	10.0515
	280.488	81.9672	6.3293	13.2888	0.7167	16.9749	16.45	-31.8115	0.3838	0.8055	36.4	1.1667	40.3341	3	22.2353
	176.073	196.375	-0.3113	7.1578	0.4	16.7297	2	-29.2114	0.2414	0.9817	85	1.3333	46.3196	0	12.0786
	464.062	124.938	4.834	4.2378	0.6667	21.7102	3.2	-29.895	0.6625	0.8885	74	1.2	39.1642	0	13.7093
	176.799	149.254	2.2156	5.3807	0.3333	22.9513	2.8833	-35.1644	1.0148	0.9941	87.7	1	53.8401	0	17.0479
	177.82	142.93	3.3081	4.3761	0.4571	19.2932	2.5857	-36.3072	0.9041	0.6405	80.2	1.25	45.1695	0	10.5766
	230.255	133.197	3.1921	2.7456	0.6333	13.7146	8.4	-37.2681	0.6544	0.8779	208.1	1.2	30.7027	0	15.7335
	140.169	111.058	4.303	5.4299	0.4	20.9106	3.3	-40.8936	0.8746	0.7528	6.8	1.25	44.458	0	10.4859
	204.492	107.088	3.1189	8.9641	0.425	26.0101	10.575	-28.5568	0.7758	0.8566	79	1	46.1319	0	16.252
	128.163	31.746	2.2034	1.3757	0.5	8.3679	3.2	-47.9675	0.3175	0.8398	4	1	52.8503	0	10.22
	321.04	116.845	2.5635	3.779	0.5667	18.7236	6.1667	-25.5066	0.7887	0.8902	135.1	1	33.0872	0	11.2218
	122.857	94.5274	5.4932	5.7323	0.625	25.1953	2.7429	-36.9293	0.4284	0.7796	83.3	1.2	45.3178	0	16.642
	367.57	80.9909	5.1392	11.5305	0.8333	17.8446	6.3833	-33.2621	0.3424	0.8106	64.6	1.1429	46.0286	2	18.7905
	201.329	194.126	0.3906	2.8213	0.4333	12.7889	14.0667	-37.1684	0.69	0.9618	158.8	1	63.9221	0	8.8505
	237.465	113.227	2.6794	5.8882	0.6	21.9349	5.5182	-33.9711	1.0586	1.0084	77.6	0.8333	50.0072	0	9.8131
	222.151	107.474	2.8625	6.8961	0.475	29.5822	3.225	-32.6706	1.0596	0.9262	88.1	1.25	52.2537	0	9.7436
	274.991	53.2688	6.3721	5.8412	1	18.1549	7.95	-35.9528	1.4359	1.0218	107.1	1.4286	48.6481	0	7.2043
	181.888	177.515	1.7212	3.404	0.4	14.4958	2	-39.9292	6.5012	1.0534	103.4	1	53.3813	0	11.0652
	146.422	99.7009	1.8066	7.9568	0.4333	18.2281	2.25	-45.1965	1.176	0.9529	245.6	1.25	64.7054	0	11.3919
	177.022	149.85	2.7222	1.8277	0.45	27.7659	1.8833	-37.8866	0.8123	0.8581	4.8	1	42.042	0	13.8004
	186.854	119.107	3.2166	3.2959	0.5786	23.8382	2.3643	-36.9768	0.7326	0.7549	8.3	0.8333	31.7928	0	16.1113
	347.173	104.058	3.8269	4.5357	0.5	23.0591	2.4	-45.2637	0.7749	0.8106	9.7	1.1667	53.0151	0	20.3705
	287.554	153.011	2.8625	3.1406	0.5	21.3216	3.5667	-32.4646	1.0455	1.1692	424.2	1	37.7401	0	12.5025
	125.019	85.7287	0.6592	1.8143	0.425	24.1974	2.5	-20.99	0.6543	1.1217	137.7	0.8	36.4899	0	12.4611
	172.069	99.6512	1.7822	5.9018	0.5667	21.7468	4.2	-39.6545	0.9232	0.9099	79.8	1.4	37.5956	0	11.3649
	142.233	110.608	1.3977	4.3819	0.5	17.4011	3.8	-33.7585	0.4437	0.893	357.4	1.2	51.5808	0	15.9895
	225.401	129.805	3.2715	4.6553	0.7	15.2806	8.2429	-51.9828	0.8991	0.7757	64.1	1.1667	45.711	0	14.499
	180.57	111.902	2.3315	5.3015	0.45	25.7782	3.05	-29.1718	0.646	0.9733	195.5	1	41.5497	0	26.0218
	156.944	172.501	4.2053	2.6414	0.5	13.9832	4.7	-45.282	1.7436	0.9267	284.7	1	27.7466	0	13.487
	157.962	74.9251	0.6104	12.4342	0.5	20.1172	2.9	-32.2205	0.3441	0.8882	83.1	1.25	46.8079	0	19.076
	99.4093	129.096	1.4221	13.7606	0.5	14.978	3.2	-36.5601	0.6541	0.9622	520.3	1.25	41.5466	0	16.4443
	133.653	145.363	2.3621	5.0429	0.4	15.6921	1.8	-41.0767	0.9657	0.8726	153.4	1	55.9814	0	10.7508
	92.8335	162.354	3.6804	7.6476	0.5	15.7145	2.6	-39.3046	0.6704	0.7959	6.9	1	46.3053	0	12.6293
	103.1	179.395	1.6479	4.1539	0.4	15.7837	1.8	-46.7834	0.7216	0.7285	10.5	1	56.4026	0	10.2333
	172.376	157.52	2.9358	3.8574	0.4222	17.5308	1.8375	-35.3889	0.6479	0.9369	132.2	1	58.8392	0	9.2379
	151.844	158.809	2.1301	2.1885	0.425	16.3086	2.5	-36.3419	0.7813	0.9144	147.3	1	58.7845	0	8.4794
	86.8885	126.646	3.2654	2.5249	0.4	17.5293	3.5	-35.8704	0.6622	0.9651	328	1	46.8445	0	9.6545
	126.739	162.107	2.7222	2.3025	0.46	15.0574	2.84	-32.2217	0.6263	0.9462	90.7	1	44.082	0	8.7156
	222.638	166.331	4.3518	2.6412	0.5	21.8719	4.45	-44.4946	1.3322	1.003	222.4	1	41.3025	0	9.2231
	83.653	106.383	1.1475	4.5983	0.5	20.99	3.9	-39.9231	0.1298	0.7964	484.6	1	49.1089	0	10.776
	204.582	122.489	4.1016	6.8908	0.575	20.6772	4.525	-32.4539	0.7761	0.7646	50.7	1	30.2979	0	14.387
	280.862	168.625	2.5513	2.9006	0.4667	21.8384	3	-36.7533	0.7876	0.8544	192.6	1	49.3835	0	9.6073
	160.181	109.181	1.1597	4.4462	0.5	22.7386	2.05	-27.8809	0.6446	0.9892	128.6	1	43.9056	0	12.283
	352.166	146.628	1.6602	8.1136	0.5	22.7905	3.7	-33.2947	0.678	0.9869	130.7	0.8	50.2747	0	9.5321
	304.111	103.252	2.1118	2.1346	0.6	19.873	2.5	-45.1477	0.1129	0.8486	34.8	1	55.5908	0	29.5698
	202.701	156.25	4.9683	3.819	0.5167	25.8036	3.4667	-28.4424	0.8387	0.828	77.9	1.25	37.6892	0	6.8974
	230.369	77.1828	4.7302	3.8159	0.6	20.5139	6.55	-30.8319	0.5516	0.6649	67.9	1.1667	44.0643	0	24.1132
	89.5103	112.763	1.1719	3.6075	0.4	20.4651	1.9	-29.8096	0.4464	0.8216	81.3	1	40.1611	0	7.7965
	326.745	95.9112	1.0376	6.5968	0.55	27.2614	4.3	-33.5083	0.7446	0.9311	65.7	1	44.8456	0	13.6432
	143.386	97.4659	1.5808	7.1943	0.55	22.29	2.7	-35.5438	0.8416	0.7898	13.8	1.25	49.9268	0	7.3424
	115.633	126.263	0.8362	1.9909	0.4	22.0195	2.45	-30.9642	0.6719	0.9894	70.1	0.75	46.6227	0	7.7492
	186.631	21.7391	3.2104	3.6429	0.5	18.1274	1.8	-40.8691	0.387	0.85	5.6	1.25	69.9707	0	24.8242
	111.065	108.965	0.769	7.3375	0.5	20.0256	4.2	-31.488	0.8652	0.8423	253.3	1	41.9739	0	8.4014
	94.3352	81.0948	3.9917	3.5447	0.5	24.2496	1.9	-29.1638	0.9333	0.7233	4.1	1	39.9561	0	8.5578
	397.572	86.5801	4.6082	10.1349	0.675	19.7426	3.8375	-33.4213	0.6914	0.805	25.5	1	50.7996	0	15.357
	303.12	99.7506	4.8889	10.0633	0.55	22.3145	2.4	-34.0454	0.2573	0.8039	21.2	1.2	51.9257	0	23.1516
	338.411	58.1677	6.1829	5.6835	0.8	23.1674	5.85	-34.4284	0.6518	0.7149	84.3	1.1429	40.152	0	25.1311
	197.329	167.173	2.8931	2.9937	0.6	18.9636	5.5667	-36.1104	0.6752	0.9235	118.5	1.2	53.2979	0	8.318
	400.742	167.57	2.0508	2.5081	0.6	17.041	2.2	-42.1631	0.2847	0.8542	238.3	1.2	59.8511	0	13.9581
	310.859	115.551	4.7485	4.0166	0.6	20.9717	5.3	-35.0952	0.496	0.7375	536.7	1.2	43.2373	0	8.5392
nFS Sst	208.471	74.7384	7.8247	30.52	0.54	17.6648	1.84	-38.4033	0.3148	0.7124	95.3	1	74.0381	1	20.7435
	212.6	86.2069	2.6428	22.6886	0.7	22.2791	3.54	-31.5442	0.5915	0.8801	84.2	0.8571	38.2349	0	17.186
	312.615	50.9424	1.5747	12.2154	0.5	27.1698	1.95	-33.194	0.4117	0.8132	38.9	1	69.9799	0	25.0622
	243.359	36.7085	2.3926	12.6343	0.4	26.2878	1.7	-29.071	0.1998	0.9522	66.1	1	74.3164	0	17.0893
	288.983	95.0475	3.5339	26.4133	0.7	18.9453	27.8	-35.7239	0.6209	0.8671	92.2	1.1429	49.4232	2	12.8957
	217.825	65.1956	1.5869	12.4667	0.42	26.3684	1.74	-28.5864	0.5736	1.0607	70.4	1	59.8499	0	24.0335
	326.226	91.0834	2.2461	14.7095	0.7	25.119	9.4	-33.0139	0.5594	0.8246	89.4	1	54.5212	1	18.5351
	288.539	54.4554	2.0142	10.4449	0.4	27.5879	2.2	-31.4148	0.5209	0.8552	107	1	60.5042	1	14.8858
	310.178	75.8342	10.9131	5.2188	0.7857	20.4084	7.9714	-29.6483	0.8052	0.69	80.8	1.1667	51.1448	0	10.3829
	191.178	72.2022	0.9949	0.9528	1.3	9.2041	36.5	-29.2603	0.7729	0.9201	525.2	1	30.9509	0	13.5015
	200.112	16.5426	-2.7283	6.5294	1.25	18.6523	33.55	-26.1078	0.4162	0.8008	72.1	1.1667	48.2971	0	19.5268
	303.83	77.6322	4.7546	26.7267	0.8	17.3096	15.3	-32.3812	0.4825	0.7761	115.1	1	49.1089	3	29.0633
	332.299	30.785	8.3252	8.0458	0.85	15.062	2.55	-28.9352	0.0945	0.5282	142.3	1	56.8161	0	24.2196
	291.813	57.7756	2.8381	27.8021	0.75	23.6191	3.15	-36.3174	0.5296	0.8953	85.1	1	64.3936	1	17.0679
	150.505	24.3072	-4.3823	15.4908	0.8333	14.7888	51.1	-38.7716	0.5318	0.9405	173.1	1.125	84.4991	0	29.3811
	307.743	104.167	2.7588	30.525	0.6	23.6837	2.8333	-33.6161	0.59	0.981	130.3	1	59.5072	1	20.5403
	476.141	87.9765	3.6316	5.9845	0.55	26.3	11.1	-32.9132	0.7314	0.9404	187.8	1	56.4606	0	19.3413
	241.528	70.8215	1.8738	26.9504	0.7	19.5435	3.4	-36.322	0.3077	0.9157	178.4	1.1429	68.3838	3	19.7639
	485.065	74.813	2.7649	12.2809	0.6	26.7212	2.8	-33.3801	0.5752	0.8774	241.4	1	54.6631	0	18.5391
	329.957	77.0342	4.9438	17.6194	0.8625	14.2448	4.0125	-39.1365	0.5585	0.8571	53.9	1	50.0351	10	30.0348
	436.465	97.4659	3.8879	25.7165	0.65	18.1458	6.55	-39.4104	0.5093	0.751	79.6	1	48.9746	1	11.1866
	232.539	65.1303	3.8086	18.7601	0.8	15.3971	11.5667	-34.9467	0.2714	0.8457	99.2	1.1429	66.7216	0	16.0389
	382.01	58.5938	2.3804	4.6823	0.88	16.9189	19	-30	0.3871	0.9994	146.1	1	45.1209	0	28.4733
	340.693	64.2292	6.7871	13.37	0.8154	15.909	2.5615	-34.6177	0.2786	0.8503	103.7	1.1429	69.8946	12	27.2839
	212.234	78.4929	5.481	27.2455	0.75	27.681	5.275	-35.2966	0.7126	0.7583	83.9	1	48.0896	1	21.8798
	260.49	67.4049	5.9814	16.4506	0.875	14.5691	16.4	-39.4836	0.6181	0.765	65.8	1.125	51.3443	0	17.5754
	305.685	42.7757	7.0251	24.9109	0.8667	35.5428	4.4667	-26.6846	0.804	0.6436	50.4	1.2857	39.6667	2	16.462
	292.997	31.1203	3.8574	33.004	0.7	12.1155	2.9	-49.6399	0.152	0.7023	61.5	1.2857	76.648	3	18.7278
	215.869	79.2812	9.7534	6.232	0.6833	16.311	7.7	-28.9836	0.2422	0.4102	61.7	1.4	52.6072	0	13.3701
	321.841	72.6392	-3.2654	11.9064	1.3875	6.3606	12.175	-36.0619	0.0924	0.9015	44.9	1.5556	58.6746	0	13.4758
	583.705	72.2394	6.9397	35.3064	1.425	11.4025	14.9909	-35.7371	0.3767	0.7339	12.9	1.1667	29.717	10	38.3896
	261.283	73.3368	3.1006	24.9825	0.9	12.3077	19.925	-25.343	0.1869	0.8782	109.3	1	45.8154	0	29.8385
	273.674	64.4202	2.771	10.964	0.65	21.9025	22.6	-37.4542	0.7483	0.8824	167.2	1	52.8839	1	26.0734
	353.493	117.527	1.0437	2.3857	0.9	11.5295	28.1	-42.0959	0.3766	0.8633	261.6	1.1	17.7063	0	26.5191
	115.24	86.2069	1.9287	19.6372	0.7	17.7307	2.75	-42.273	0.748	0.9645	260.5	1	63.2782	0	37.0599
	145.196	31.1249	1.3245	2.8781	0.98	18.2019	27.88	-40.5994	0.6072	0.7393	61.3	1.3333	65.3064	0	29.9928
	365.083	44.6872	5.3955	16.6943	0.9	15.6464	3.1	-36.5265	0.1599	0.7053	33.8	1	60.376	0	33.817
	266.757	51.0441	7.5195	27.8736	0.76	13.1714	2.7	-34.895	0.4393	0.7543	119.1	1.1429	58.1885	6	18.4663
	398.715	70.9891	3.595	24.068	0.55	25.4272	3.05	-34.3994	0.8754	0.8092	23	1	60.6506	1	23.6205
	248.093	59.3472	1.7639	23.1878	0.7	21.17	9.3	-35.1685	0.3946	0.9101	161.9	1	63.3148	2	16.6638
	305.331	61.0902	1.0071	9.6073	0.6	24.5728	13.7	-29.8645	0.6687	0.8879	112.4	1	48.8647	0	24.9263
	421.799	70.1754	-3.4241	12.4101	1.23	11.9968	12.4333	-35.2197	0.2879	0.8125	59.1	1.3	57.478	3	13.1466
	245.119	87.5912	2.6978	20.6477	0.54	23.2376	16.65	-31.0266	0.5253	0.8364	57.7	1	64.989	1	13.0717
	456.809	59.1716	4.95	6.2397	0.65	21.3684	6.8	-39.1754	0.8169	0.7932	25.3	1.1667	64.2975	0	15.3473
	194.233	73.3855	3.4119	18.7163	0.5	24.2655	2.0333	-34.8307	0.7714	0.8326	59	1	69.4295	0	19.7238
