# Supplementary material for: Cell-type-specific control of basolateral amygdala neuronal circuits via entorhinal cortex-driven feedforward inhibition
Source: eLife. 2020 Jan 9;9:e50601. doi: 10.7554/eLife.50601 (PMC6984813; doi:10.7554/eLife.50601)
Supplement: Figure 3—source data 5. [file elife-50601-fig3-data5.xlsx]

## Sheet: Sheet1
		Panel	Group	Measure	Values
		3F	PV	dVm/dt (mV/ms)	1.09863	1.31226	1.28174	1.5564	2.28882	2.34985	2.10571	1.92261	1.58691	1.89209	2.2583	2.74658	3.41797	4.79126	12.4207	75.0122	219.91	187.714	-1.00708	-123.871	-158.997	-141.815	-103.577	-69.3665	-44.5862	-27.9236	-17.0898	-10.8032	-6.65283	-4.30298	-2.62451	-1.25122	-0.823975	-0.549316	-0.12207	-0.0305176	0.305176	0.213623	0.457764	0.610352	0.762939	0.610352	0.671387	0.793457	0.671387
					0.935872	1.05794	0.823975	0.854492	1.12915	1.08846	1.05794	1.08846	1.06812	1.27157	1.74967	2.05485	2.60417	4.15039	17.7612	82.3568	173.503	173.523	55.1656	-41.7277	-96.6797	-116.872	-113.617	-95.0114	-72.1334	-52.5614	-37.4451	-26.296	-18.5547	-12.9496	-9.12476	-6.58162	-4.56746	-3.184	-2.27865	-1.50553	-0.986735	-0.681559	-0.366211	0	0.213623	0.305176	0.366211	0.356038	0.447591
					1.05286	1.22579	1.28174	1.08846	1.65812	2.23796	2.38546	2.52787	2.48718	2.7415	2.99581	3.4434	4.44031	6.55619	16.6372	89.1775	202.606	167.465	44.8151	-43.3553	-91.3289	-108.77	-107.33	-93.4143	-74.3713	-56.5135	-41.8905	-30.9347	-22.7254	-16.7084	-12.4105	-9.54692	-7.16654	-5.49825	-4.26737	-3.22469	-2.6296	-2.20235	-1.91752	-1.52588	-1.34277	-0.96639	-0.783285	-0.610352	-0.554403
					0.305176	0.305176	-0.0610352	-0.305176	-0.488281	-0.183105	-0.12207	-0.427246	0.183105	0.976563	2.62451	3.17383	4.08936	5.00488	8.11768	37.9028	81.1157	140.198	136.902	63.2324	3.54004	-35.2173	-58.0444	-69.1528	-71.167	-66.8335	-58.2886	-48.9502	-39.978	-31.9824	-25.4517	-20.0806	-15.564	-12.5732	-10.2539	-7.99561	-6.53076	-5.31006	-4.3335	-3.54004	-3.11279	-2.74658	-2.38037	-2.01416	-1.89209
					1.56657	1.48519	1.09863	0.996908	1.2207	1.40381	1.77002	1.70898	1.89209	2.23796	2.64486	2.92969	3.68245	5.22868	9.27734	45.3898	151.957	197.917	73.7305	-47.3226	-109.517	-122.823	-109.538	-86.5479	-64.2293	-45.9798	-32.3893	-22.9289	-16.0929	-11.5967	-8.32113	-5.7373	-4.23177	-3.0721	-2.42106	-1.72933	-1.20036	-0.854492	-0.528971	-0.223796	0.0610352	0.142415	0.264486	0.345866	0.610352
					0.954368	0.90443	0.8212	0.876687	0.943271	1.29838	1.46484	1.62021	1.92538	2.06965	2.42476	2.83536	3.49565	5.13805	15.5473	64.4143	126.792	115.545	45.1549	-11.4025	-44.5501	-60.214	-64.0203	-60.9575	-53.8829	-45.6432	-37.5311	-30.34	-24.1644	-19.2871	-15.3309	-12.1404	-9.73788	-7.8236	-6.26998	-5.03263	-4.13929	-3.5012	-2.85201	-2.28604	-1.93093	-1.64795	-1.40381	-1.20961	-1.07644
					0.0203451	-0.0610352	0.0406901	0.0813802	0.223796	0.284831	0.447591	0.488281	0.813802	0.874837	1.28174	1.15967	1.58691	2.90934	14.8112	46.6716	83.4351	99.2635	74.7477	42.7246	16.3167	-5.37109	-22.3185	-35.6852	-43.7622	-47.7498	-47.4447	-44.2912	-40.0798	-35.4614	-31.189	-27.1606	-23.3358	-20.0602	-17.2119	-14.8519	-12.6953	-11.0067	-9.41976	-8.13802	-7.03939	-6.1849	-5.39144	-4.69971	-4.23177
					0.708008	1.23291	1.44043	1.40381	1.45264	1.5625	1.68457	1.97754	1.98975	1.9165	2.52686	3.00293	3.58887	4.91943	12.2314	56.7261	129.944	200.146	135.767	4.1748	-84.8022	-125.964	-129.968	-115.552	-93.2983	-69.1772	-48.4009	-33.1177	-22.4854	-15.1123	-9.99756	-6.56738	-4.43115	-2.84424	-1.59912	-0.793457	-0.378418	-0.268555	-0.0732422	0.280762	0.512695	0.500488	0.500488	0.585938	0.671387
					2.01416	2.0752	1.77002	1.09863	0.976563	0.427246	1.52588	1.52588	3.41797	2.99072	3.05176	3.17383	2.92969	2.86865	5.49316	48.2178	222.9	342.163	88.9282	-155.701	-234.68	-208.679	-145.02	-85.9375	-48.523	-27.2827	-14.4043	-6.34766	-2.31934	-0.12207	1.40381	2.44141	2.62451	2.44141	2.31934	2.50244	1.89209	2.19727	2.13623	1.89209	1.83105	1.52588	1.64795	1.52588	1.28174
					2.01416	2.0752	1.77002	1.09863	0.976563	0.427246	1.52588	1.52588	3.41797	2.99072	3.05176	3.17383	2.92969	2.86865	5.49316	48.2178	222.9	342.163	88.9282	-155.701	-234.68	-208.679	-145.02	-85.9375	-48.523	-27.2827	-14.4043	-6.34766	-2.31934	-0.12207	1.40381	2.44141	2.62451	2.44141	2.31934	2.50244	1.89209	2.19727	2.13623	1.89209	1.83105	1.52588	1.64795	1.52588	1.28174
					0.488281	0.915527	1.26139	1.2207	1.24105	1.09863	1.24105	1.48519	2.01416	2.13623	2.44141	2.82796	3.35693	4.59798	16.2964	89.7624	217.936	262.085	99.4263	-58.1258	-146.261	-163.513	-147.298	-116.028	-83.0078	-56.8237	-38.2894	-25.8382	-17.924	-12.2274	-8.64665	-6.20524	-4.5166	-3.43831	-2.64486	-2.01416	-1.81071	-1.38346	-1.24105	-0.935872	-0.895182	-0.712077	-0.569661	-0.305176	-0.0406901
					0.976563	1.0376	1.67847	1.37329	1.2207	1.25122	0.946045	1.58691	1.98364	1.7395	1.67847	1.95313	2.71606	4.39453	11.1694	59.5398	142.883	203.857	151.764	45.1965	-30.3345	-76.5076	-98.6938	-103.851	-100.586	-90.5151	-76.2024	-60.0586	-46.3562	-35.0342	-25.9399	-19.1956	-14.0991	-10.2844	-7.38525	-5.46265	-3.75366	-2.53296	-1.83105	-1.58691	-0.793457	-0.762939	-0.549316	-0.244141	0.152588
					0.976563	1.12915	1.11389	0.854492	0.534058	0.808716	0.961304	1.11389	0.976563	1.14441	1.58691	1.60217	1.98364	3.2959	18.0664	62.3932	128.754	249.191	207.031	35.1715	-91.5375	-148.621	-155.548	-140.076	-110.931	-79.1779	-53.7567	-35.553	-23.5596	-15.0452	-9.42993	-5.53894	-2.86865	-1.43433	0.183105	1.11389	1.80054	1.92261	2.12097	2.24304	2.2583	2.38037	2.31934	2.16675	2.15149
					1.68945	1.69678	1.94824	1.92627	2.00928	2.16797	2.37061	2.6123	2.87842	3.16406	3.72803	4.82422	6.02295	8.26416	16.98	71.0205	204.856	242.126	53.0811	-109.939	-173.374	-165.076	-129.773	-90.2051	-58.7158	-36.8823	-22.4927	-13.2471	-7.0166	-3.33496	-0.883789	0.681152	1.62842	2.11914	2.36572	2.44141	2.46582	2.44629	2.29004	2.12158	1.98486	1.81885	1.67969	1.521	1.4209
					1.74561	1.5625	1.5625	1.79443	1.84326	1.75781	1.97754	1.92871	2.2583	2.35596	2.69775	2.91748	3.58887	4.94385	19.3481	82.4829	156.091	151.27	69.0308	-8.72803	-57.3608	-84.3384	-93.75	-90.21	-78.8452	-64.624	-51.5381	-40.2832	-31.2378	-24.1333	-18.811	-14.7461	-11.7065	-9.2041	-7.15332	-5.896	-4.76074	-3.89404	-3.23486	-2.73438	-2.12402	-1.7334	-1.5625	-1.15967	-0.817871
					1.02016	1.3079	1.57819	1.38637	1.35149	1.33405	1.57819	1.67411	1.40381	1.34277	2.0752	2.80762	3.65339	5.80706	15.1629	61.567	118.434	112.069	24.7977	-48.0172	-85.58	-94.2121	-83.8361	-66.1708	-49.0984	-35.4701	-25.6871	-18.0315	-12.9918	-9.73947	-7.22831	-5.2403	-4.08064	-2.65939	-2.35421	-1.79618	-1.10735	-0.767299	-0.671387	-0.392369	0.0697545	-0.174386	0.217983	0.340053	0.209263
					0.32959	0.286865	0.476074	0.634766	0.500488	0.494385	0.848389	0.88501	0.891113	1.06201	1.30005	1.42212	1.64795	2.69775	20.9534	98.2239	235.602	228.619	-4.05884	-166.803	-189.575	-140.338	-89.2334	-53.9001	-31.6528	-17.9993	-9.85718	-5.07813	-2.09961	-0.457764	0.415039	0.958252	1.18408	1.2085	1.16577	1.34277	1.15967	1.22681	1.14746	1.14746	0.939941	1.06812	1.13525	1.12915	0.860596
					0.109863	0.134277	0.0976563	0.0976563	0.183105	0.268555	0.524902	0.476074	0.610352	0.90332	0.878906	1.19629	1.45264	2.28271	14.7461	52.356	94.3726	210.535	182.544	-24.939	-153.003	-166.04	-126.746	-86.023	-56.1035	-35.9619	-22.6807	-13.9893	-8.52051	-5.06592	-2.83203	-1.57471	-0.830078	-0.231934	0.109863	0.231934	0.317383	0.476074	0.549316	0.598145	0.512695	0.610352	0.500488	0.634766	0.549316
					1.49536	1.34277	1.60217	1.63269	1.9989	1.98364	1.89209	1.58691	2.24304	2.67029	3.12805	3.40271	3.9978	5.5542	14.4501	73.6084	165.604	171.036	54.8553	-42.8467	-90.7135	-105.591	-101.151	-85.7849	-67.3676	-50.6897	-37.5214	-27.5116	-20.1721	-14.8926	-10.9558	-8.3313	-6.40869	-4.69971	-3.50952	-2.94495	-2.44141	-2.09045	-1.32751	-1.25122	-0.88501	-0.778198	-0.488281	-0.152588	-0.38147
					1.70898	2.19727	2.01416	1.95313	1.58691	2.31934	2.92969	2.50244	2.68555	3.479	3.84521	3.2959	3.479	5.67627	15.5029	137.268	338.562	149.597	-98.2666	-194.641	-192.139	-143.188	-89.1113	-52.3682	-30.5786	-16.7847	-8.97217	-4.15039	-0.915527	0.244141	0.610352	0.671387	0.915527	1.46484	1.46484	1.64795	1.28174	1.58691	1.52588	1.40381	1.58691	1.40381	1.09863	1.83105	1.46484
					-0.183105	0.244141	0.366211	0.732422	1.15967	1.52588	1.89209	4.3335	5.24902	4.76074	4.88281	5.49316	5.5542	7.08008	9.21631	46.936	228.333	265.137	19.2261	-150.33	-185.486	-148.132	-94.2993	-56.3965	-32.2266	-18.7378	-11.4746	-6.5918	-4.5166	-2.92969	-1.89209	-1.40381	-1.34277	-1.34277	-0.732422	-1.0376	-0.915527	-1.09863	-0.610352	0.12207	-0.183105	0.366211	0.0610352	0.244141	0.427246
					0.488281	0.244141	0.183105	0.793457	1.70898	2.19727	2.68555	3.05176	2.92969	2.99072	2.2583	2.38037	3.41797	5.98145	30.5786	91.6138	156.433	108.704	16.2354	-52.124	-84.1675	-90.21	-79.2847	-63.8428	-49.8657	-38.6353	-29.6021	-22.644	-17.9443	-14.0991	-11.5967	-9.52148	-8.11768	-6.22559	-5.31006	-4.39453	-3.60107	-2.92969	-2.31934	-1.89209	-1.95313	-1.46484	-0.671387	-0.915527	-1.0376
					0.183105	0.427246	0.427246	0	0.244141	0.793457	0.976563	0.793457	0.915527	1.34277	1.0376	1.46484	2.31934	2.19727	7.38525	54.6875	147.705	102.417	-19.7754	-77.3926	-76.5381	-61.4014	-45.0439	-33.9966	-24.292	-18.4937	-13.3667	-9.8877	-7.69043	-5.7373	-4.21143	-3.2959	-2.50244	-2.13623	-1.64795	-1.58691	-1.0376	-0.732422	-0.793457	-0.305176	-0.183105	-0.366211	0.0610352	0	-0.12207
					0.274658	0.152588	0.610352	1.09863	1.25122	1.15967	0.915527	0.823975	0.396729	0.762939	1.00708	1.12915	0.823975	1.52588	4.15039	41.1072	101.257	197.266	149.658	-3.08228	-91.0034	-115.753	-105.286	-82.6416	-61.0046	-43.396	-31.1584	-22.583	-17.0288	-12.7258	-9.70459	-7.04956	-5.21851	-3.93677	-3.11279	-3.05176	-1.70898	-0.793457	-0.427246	-0.305176	-0.183105	-0.335693	0.335693	0.213623	0.244141
					0.427246	0.488281	0.427246	0.610352	0.610352	-0.12207	0.244141	0.549316	0.671387	0.488281	0.793457	1.34277	1.95313	2.38037	18.8599	85.022	200.806	259.094	38.9404	-132.263	-177.551	-154.114	-109.009	-71.167	-45.2881	-28.0151	-17.9443	-12.0239	-7.69043	-5.12695	-4.39453	-3.78418	-3.2959	-2.50244	-2.38037	-1.77002	-1.89209	-1.70898	-1.2207	-1.58691	-1.15967	-0.732422	-0.427246	-0.488281	-0.305176
					0.244141	0.244141	-0.0610352	-0.366211	0.0610352	1.0376	1.28174	1.52588	2.56348	2.44141	2.01416	2.62451	2.80762	3.72314	24.5972	90.7593	111.694	65.2466	14.5264	-21.1182	-39.6118	-44.2505	-42.3584	-38.3301	-33.6914	-29.1138	-24.9634	-21.6064	-18.3716	-15.8081	-13.6719	-11.9019	-10.376	-8.91113	-7.69043	-6.95801	-5.92041	-5.06592	-4.76074	-4.27246	-3.72314	-3.23486	-3.05176	-2.62451	-2.38037
					-0.732422	-0.671387	-0.732422	0.366211	0.610352	0.854492	1.2207	1.40381	2.2583	2.99072	2.86865	3.17383	3.60107	4.5166	12.6343	93.1397	191.528	77.2705	-59.8755	-114.319	-103.149	-75.9888	-52.7344	-36.8652	-25.3296	-16.5405	-11.7798	-9.0332	-5.98145	-5.00488	-4.27246	-3.35693	-2.80762	-2.31934	-2.31934	-1.83105	-1.95313	-1.64795	-1.52588	-1.52588	-1.09863	-0.671387	-0.0610352	-0.366211	-0.305176
					-0.579834	0.335693	0.0610352	0.305176	0.213623	0.640869	0.701904	0.793457	0.976563	0.88501	1.40381	1.64795	2.31934	3.84521	24.231	139.496	216.827	56.9458	-83.4351	-129.7	-116.638	-85.8459	-58.1665	-38.6963	-25.9094	-17.8528	-12.8174	-9.79614	-8.05664	-6.92749	-5.52368	-4.54712	-4.08936	-3.44849	-2.89917	-2.38037	-1.86157	-2.0752	-1.61743	-1.43433	-1.46484	-1.43433	-0.976563	-0.854492	-0.793457
					0.244141	0.244141	-0.366211	0.335693	1.12915	1.77002	1.2207	0.946045	1.67847	2.28882	2.74658	3.23486	3.20435	4.11987	18.8293	69.8853	157.41	193.695	83.4961	-51.4526	-119.11	-130.707	-112.274	-83.7097	-58.2886	-39.7339	-27.0691	-18.219	-12.4817	-8.5144	-6.04248	-4.15039	-2.89917	-1.92261	-1.61743	-0.88501	-1.06812	-0.335693	-0.0610352	-0.366211	-0.183105	0.335693	0.396729	0.305176	0.366211
					0.183105	-0.183105	0.183105	0.610352	0.366211	0.793457	0.671387	1.52588	5.79834	7.01904	6.16455	4.63867	3.54004	3.479	9.52148	95.459	259.46	218.262	20.9961	-106.018	-149.536	-142.822	-112.366	-78.7354	-52.8564	-35.4614	-24.7803	-17.4561	-12.4512	-9.64355	-7.44629	-5.7373	-3.72314	-2.56348	-2.2583	-2.0752	-2.80762	-1.89209	-1.40381	-1.15967	-1.28174	-1.58691	-1.2207	-0.732422	-0.549316
					-0.488281	-0.549316	-0.671387	-0.183105	-0.366211	-0.610352	0	0.305176	0.793457	2.62451	4.27246	4.3335	4.3335	4.63867	10.9863	97.7173	255.188	152.771	-76.8433	-173.218	-154.846	-102.051	-61.8896	-36.2549	-21.4844	-12.8174	-7.87354	-4.63867	-2.92969	-1.77002	-1.40381	-1.09863	-0.671387	0.12207	0.366211	0	0.488281	0.488281	1.09863	0.671387	-0.0610352	0.183105	0.549316	0.793457	0.366211
					0.732422	0.976563	0.427246	0.12207	1.15967	2.2583	2.44141	2.74658	2.99072	3.05176	3.05176	2.68555	2.92969	5.06592	22.4609	102.417	157.715	89.2944	13.4888	-34.0576	-57.1899	-66.6504	-64.209	-55.9082	-47.0581	-38.6353	-31.4941	-25.5127	-20.9351	-17.395	-14.0991	-11.4746	-9.33838	-7.62939	-6.28662	-5.5542	-5.24902	-4.27246	-3.60107	-2.99072	-2.56348	-2.2583	-2.38037	-2.13623	-1.52588
					2.19727	2.31934	1.83105	2.0752	2.50244	2.92969	1.83105	1.83105	2.38037	2.0752	1.70898	2.13623	2.2583	3.41797	12.085	104.492	284.973	181.519	-37.5977	-150.94	-171.021	-140.076	-95.1538	-60.2417	-37.4756	-23.1934	-14.6484	-8.42285	-5.85938	-3.96729	-2.50244	-2.01416	-1.58691	-1.15967	-1.28174	-1.15967	-1.40381	-1.0376	-1.28174	-1.0376	-0.732422	-0.793457	-0.427246	-0.549316	-0.671387
					1.83105	1.70898	1.28174	1.58691	1.46484	1.83105	2.0752	2.13623	1.58691	1.83105	1.77002	2.74658	2.99072	3.11279	5.79834	36.2549	141.357	209.473	97.8394	-15.686	-77.0874	-101.501	-102.6	-89.9048	-71.8994	-55.3589	-41.748	-31.6162	-23.4375	-18.4326	-14.7095	-11.4746	-9.70459	-7.69043	-5.98145	-5.24902	-4.39453	-3.54004	-2.74658	-1.95313	-1.77002	-1.58691	-1.34277	-1.2207	-0.305176
					-0.12207	0.305176	1.40381	2.31934	2.19727	2.13623	2.80762	3.35693	3.35693	3.35693	3.78418	4.27246	4.63867	6.28662	20.5688	116.333	214.722	149.841	32.4707	-46.3257	-91.0645	-109.07	-108.521	-93.2007	-73.6694	-55.542	-41.0156	-30.3345	-21.8506	-15.7471	-12.5122	-9.46045	-7.08008	-6.34766	-5.31006	-3.84521	-3.17383	-2.13623	-2.13623	-1.58691	-1.46484	-1.15967	-0.732422	-0.610352	-0.549316
					1.0376	2.13623	3.35693	3.23486	2.13623	1.58691	2.31934	2.19727	1.77002	1.64795	2.2583	2.74658	3.41797	4.39453	7.69043	37.1094	181.152	273.987	73.7305	-110.535	-176.941	-165.894	-122.192	-79.3457	-49.9878	-31.0669	-19.165	-12.3291	-7.50732	-4.21143	-2.86865	-1.46484	-1.58691	-0.976563	-0.305176	-0.12207	-0.732422	-0.671387	-0.244141	-0.0610352	-0.12207	0.183105	-0.0610352	0.488281	0.427246
					1.14136	1.17188	1.33667	1.26953	1.55029	1.62354	1.53809	1.67236	2.00195	2.29492	2.74658	2.96631	3.83911	5.21851	11.499	60.4797	165.027	216.754	84.1126	-58.5083	-130.701	-143.005	-124.799	-96.2647	-69.3054	-48.6206	-34.1003	-24.1211	-17.395	-12.8174	-9.63745	-7.36084	-5.76172	-4.40674	-3.57056	-2.92358	-2.50854	-1.87378	-1.48926	-1.25732	-1.12305	-0.762939	-0.610352	-0.43335	-0.292969
					1.39025	1.52588	1.57561	1.68864	1.69316	1.83784	1.88983	2.15205	2.19501	2.4188	2.83927	3.43831	3.98763	5.47282	14.2054	117.612	340.764	148.86	-187.482	-253.052	-173.796	-91.5324	-43.1993	-18.41	-6.48781	-0.506366	2.13849	3.00203	3.14444	2.91386	2.66972	2.44593	1.96217	1.62534	1.41963	1.13706	0.999168	0.931351	0.72564	0.648781	0.646521	0.610352	0.332303	0.458894	0.327781
					1.46484	1.77002	2.19727	2.62451	1.52588	2.74658	2.68555	2.50244	2.2583	3.17383	4.08936	3.60107	4.21143	5.61523	34.1187	176.636	232.361	21.6675	-142.334	-182.129	-147.339	-96.7407	-58.7158	-34.5459	-20.5078	-12.4512	-7.50732	-3.96729	-2.62451	-1.40381	-0.488281	-0.183105	-0.488281	-0.549316	-0.488281	-0.732422	0.183105	0.12207	-0.366211	0.305176	0.366211	0.549316	0.305176	0.549316	0
					0.610352	0.610352	1.70898	1.28174	2.38037	2.13623	3.84521	2.56348	3.05176	3.35693	3.23486	5.00488	4.69971	8.17871	20.2026	87.8906	160.706	109.131	6.5918	-60.4858	-96.3135	-101.318	-88.501	-69.6411	-51.0864	-37.7197	-26.8555	-20.9351	-16.5405	-12.5732	-10.376	-8.36182	-7.14111	-5.61523	-4.57764	-4.27246	-3.05176	-2.68555	-2.38037	-1.34277	-0.854492	-0.549316	-0.671387	-0.610352	0.0610352
					1.00708	0.976563	1.06812	1.28174	0.976563	1.43433	1.92261	1.86157	1.98364	2.04468	2.28882	2.19727	2.38037	4.36401	23.0713	119.812	232.208	140.076	-21.3318	-111.481	-134.796	-117.889	-87.0972	-60.3943	-40.741	-27.2522	-17.8833	-12.4817	-8.60596	-6.13403	-4.36401	-3.35693	-2.62451	-2.28882	-2.04468	-1.58691	-1.67847	-1.5564	-1.09863	-1.31226	-0.88501	-1.12915	-0.610352	-1.06812	-0.518799
					1.68283	2.09263	2.11879	2.17983	2.33677	2.47628	2.5286	2.73786	3.03432	3.30462	3.88881	4.37709	5.46701	7.28934	15.9563	88.1435	206.046	150.626	12.5296	-85.0045	-127.93	-130.624	-110.718	-85.2661	-62.7965	-45.3317	-32.3312	-23.6642	-17.2642	-12.6517	-9.59996	-7.3155	-5.78962	-4.68227	-3.65339	-2.92097	-2.36293	-2.08391	-1.62179	-1.22942	-1.01144	-0.653948	-0.662667	-0.558036	-0.209263
					0.808716	1.15967	1.17493	1.15967	1.37329	1.72424	1.8158	1.77002	1.80054	1.67847	1.90735	2.65503	3.92151	5.58472	15.4724	100.327	243.408	146.561	-55.542	-157.089	-165.863	-127.106	-82.016	-49.7894	-29.3121	-16.8457	-9.56726	-4.83704	-2.12097	-0.686646	0.0762939	0.686646	0.915527	1.23596	1.08337	1.09863	0.900269	0.961304	0.88501	0.946045	0.778198	0.762939	0.747681	0.640869	0.442505
					1.23291	1.44043	1.67236	1.74561	1.58691	1.59912	2.00195	2.56348	2.6001	3.10059	3.479	3.96729	4.91943	6.72607	15.5151	70.3613	179.443	138.293	-20.1294	-118.872	-142.456	-119.739	-84.4849	-55.3833	-35.437	-22.1436	-13.7817	-8.6792	-5.09033	-3.18604	-1.77002	-0.866699	-0.305176	0.012207	0.378418	0.708008	0.756836	0.756836	0.830078	1.2207	1.2207	1.11084	1.19629	1.11084	1.18408
					1.09863	1.36312	1.68864	2.21761	2.0752	2.40072	2.44141	2.76693	2.76693	2.90934	3.21452	3.68245	4.53695	6.12386	11.3932	51.5544	173.36	182.658	18.2088	-105.876	-145.854	-130.127	-94.7876	-62.561	-39.8356	-24.8413	-15.5436	-9.56217	-5.87972	-3.74349	-2.38037	-1.58691	-1.20036	-0.752767	-0.854492	-0.467936	-0.467936	-0.427246	-0.549316	-0.12207	-0.366211	-0.305176	-0.142415	-0.244141	-0.101725
					1.08643	1.28174	0.952148	1.08643	1.07422	1.34277	1.70898	2.0752	2.11182	2.27051	2.31934	3.05176	3.54004	5.16357	19.4092	67.688	141.919	153.979	80.0415	5.63965	-47.229	-75.8179	-86.853	-85.7544	-76.7822	-64.624	-52.417	-41.8579	-33.0566	-25.9033	-20.1172	-15.8325	-12.7075	-10.1685	-8.26416	-6.66504	-5.5542	-4.65088	-3.77197	-3.2959	-2.81982	-2.28271	-1.9043	-1.68457	-1.37939
					1.2207	1.2207	1.83105	1.83105	1.95313	2.31934	2.13623	2.19727	2.31934	2.92969	2.80762	3.41797	3.11279	4.15039	12.7563	97.9004	243.713	330.444	-24.231	-265.686	-262.024	-166.077	-85.6323	-41.3208	-18.8599	-6.7749	-1.64795	0.854492	2.44141	2.2583	2.92969	2.56348	2.56348	2.19727	1.89209	1.58691	1.28174	0.549316	1.09863	0.671387	0.305176	0.610352	0.427246	0.610352	0.610352
					1.25122	1.7395	1.57166	1.63269	1.96838	1.84631	1.84631	2.02942	2.74658	3.14331	3.75366	4.0741	5.08118	7.30896	12.8326	65.5975	263.84	166.046	-127.136	-217.087	-168.121	-99.1669	-53.1006	-26.825	-12.4664	-5.15747	-1.31226	0.50354	1.14441	1.57166	1.72424	1.5564	1.49536	1.35803	1.15967	0.717163	0.762939	0.671387	0.427246	0.488281	0.228882	0.213623	0.0305176	0.274658	0.198364
					0.854492	0.732422	0.12207	0.305176	-0.488281	0.366211	-0.12207	-0.0610352	2.62451	5.06592	4.08936	4.57764	5.00488	5.85938	9.94873	64.8804	155.701	274.902	59.4482	-179.504	-225.098	-167.236	-95.9473	-49.7437	-24.9023	-12.2681	-4.39453	-0.549316	0.854492	2.31934	2.2583	2.50244	2.99072	2.2583	2.19727	2.0752	2.01416	1.58691	1.83105	1.58691	1.28174	1.2207	1.2207	1.15967	1.28174
					1.0437	1.26953	1.36108	1.35498	1.55029	1.47705	1.49536	1.65405	1.87378	1.98975	2.2522	2.66724	3.26538	4.71191	15.2588	65.7898	145.313	166.388	60.1746	-46.0388	-102.289	-116.766	-107.098	-85.8154	-63.9648	-46.051	-32.4646	-23.1567	-16.7236	-12.3047	-9.29565	-7.1106	-5.69458	-4.79736	-3.88794	-3.16772	-2.52075	-2.23999	-1.83105	-1.69067	-1.33667	-1.25122	-0.891113	-0.872803	-0.805664
					1.15967	1.07829	1.09863	1.46484	2.36003	2.6652	2.68555	2.50244	2.36003	2.19727	2.19727	2.44141	2.92969	4.1097	22.5627	100.911	185.038	250.387	111.613	-39.9373	-122.843	-145.121	-132.751	-106.506	-78.1453	-55.0944	-38.3301	-26.8962	-18.8599	-13.3667	-9.33838	-6.32731	-4.86247	-3.2959	-2.38037	-1.77002	-1.38346	-1.2207	-0.874837	-0.651042	-0.386556	-0.528971	-0.244141	-0.264486	-0.183105
					3.01107	2.86865	2.74658	2.44141	2.11589	2.19727	1.81071	1.83105	1.93278	2.50244	2.68555	3.13314	3.88591	6.1849	18.6157	91.0441	187.439	149.048	40.4867	-45.9798	-95.2962	-111.389	-105.916	-88.6434	-69.7021	-52.9989	-39.6118	-29.7241	-22.3185	-17.0085	-13.0005	-9.98942	-8.23975	-6.73421	-5.37109	-4.49626	-3.68245	-3.09245	-2.58382	-2.17692	-1.91243	-1.79036	-1.52588	-1.30208	-1.15967
			FS Sst		0.488281	0.0305176	0.549316	0.732422	1.00708	1.77002	2.65503	3.08228	2.34985	1.7395	2.41089	2.19727	2.47192	4.36401	8.39233	59.4482	236.023	255.615	-6.40869	-172.363	-196.045	-152.71	-95.8557	-56.5186	-32.9285	-19.6838	-11.261	-6.34766	-3.8147	-2.89917	-1.86157	-1.0376	-0.915527	-1.25122	-1.00708	-0.793457	-0.457764	-0.854492	-1.12915	-0.732422	-0.549316	-0.579834	-0.732422	-0.335693	-0.0305176
					0.396729	0.620524	0.732422	0.712077	0.956217	0.915527	1.08846	1.25122	1.41398	1.7395	1.81071	1.90226	2.39054	3.5909	14.3331	58.4106	112.762	123.311	80.3935	28.4627	-14.5264	-43.9962	-62.1541	-70.7092	-70.0073	-63.0391	-53.1413	-43.4875	-34.7188	-27.0894	-20.8232	-15.7776	-11.9425	-8.81958	-6.43921	-4.43522	-3.09245	-1.99382	-1.30208	-0.488281	-0.0508626	0.0813802	0.284831	0.579834	0.467936
					1.52588	0.915527	0.915527	1.15967	1.70898	1.46484	1.52588	1.09863	1.95313	2.56348	2.56348	2.56348	3.54004	6.04248	32.2876	152.527	242.004	68.6646	-84.7778	-134.155	-123.474	-95.3369	-67.5659	-45.6543	-29.9072	-19.2871	-12.2681	-6.95801	-4.63867	-3.05176	-1.95313	-0.671387	-0.366211	-0.183105	-0.244141	0.366211	0.732422	0.488281	0.427246	0	0.854492	0.610352	0.366211	0.732422	0.915527
					0.793457	0.793457	0.732422	0.732422	0.874837	0.406901	0.732422	1.18001	1.24105	1.15967	1.20036	1.87174	2.78727	4.17074	15.7878	53.8127	117.106	129.578	74.5239	16.6219	-27.0182	-55.603	-72.4487	-76.6398	-70.8415	-60.8114	-50.415	-40.7308	-32.4707	-25.472	-20.4671	-16.4998	-12.9801	-10.1725	-8.0363	-6.57145	-5.37109	-3.86556	-3.23486	-2.62451	-1.99382	-1.4445	-1.15967	-0.895182	-0.569661
					-0.193278	-0.0406901	0.0305176	0.223796	0.396729	0.610352	1.07829	1.13932	1.41398	1.39364	1.72933	2.19727	2.89917	4.1097	15.1978	92.7226	248.291	197.388	-41.9718	-170.919	-179.454	-132.955	-84.6151	-52.002	-32.2469	-20.3857	-13.5396	-9.257	-6.4799	-4.86247	-3.69263	-3.03141	-2.58382	-2.0752	-1.88192	-1.46484	-1.2207	-0.895182	-0.630697	-0.488281	-0.427246	-0.274658	-0.244141	0.111898	-0.0508626
					0.706264	1.08991	1.18583	1.20326	1.25558	1.36021	1.20326	1.38637	1.7177	2.23214	2.69427	2.96456	3.77546	5.77218	22.3476	81.8656	162.999	158.953	40.9372	-59.2128	-107.352	-114.554	-99.8186	-77.349	-56.1175	-39.0799	-26.9601	-18.4849	-12.4686	-8.51876	-5.88553	-3.8365	-2.37165	-1.74386	-1.31662	-0.837054	-0.558036	-0.348772	-0.296456	-0.113351	0.0784738	0.148228	0.13079	0.148228	0.25286
					0.0406901	0.386556	0.142415	0.0610352	0.345866	0.305176	0.366211	0.345866	0.427246	0.345866	0.630697	0.712077	1.01725	2.54313	16.4998	49.2961	106.669	101.888	46.0002	-2.09554	-32.491	-46.8547	-48.8281	-44.9422	-39.0828	-33.1421	-27.771	-23.1527	-19.3888	-16.0726	-13.387	-11.4136	-9.68425	-8.11768	-6.7749	-6.00179	-5.35075	-4.72005	-4.15039	-3.60107	-3.13314	-2.90934	-2.44141	-2.17692	-2.13623
					2.68555	2.80762	2.62451	2.38037	2.92969	2.99072	3.84521	3.72314	3.78418	3.72314	3.90625	4.02832	4.82178	6.5918	11.7188	71.4722	201.355	156.921	14.8315	-73.6084	-105.652	-103.699	-87.7686	-67.0166	-49.0723	-36.8652	-27.2827	-20.5688	-16.6016	-12.0239	-10.5591	-7.32422	-7.50732	-4.45557	-5.12695	-3.11279	-3.66211	-1.95313	-2.38037	-1.89209	-0.671387	-1.70898	-0.671387	-0.366211	-1.40381
					0.976563	1.37329	1.86157	1.61743	1.14441	2.28882	1.95313	2.45667	2.7771	3.28064	3.54004	3.8147	5.56946	8.20923	19.7144	95.9473	201.279	139.603	-0.62561	-93.8721	-130.722	-128.54	-103.439	-74.4629	-50.6897	-34.1949	-22.2931	-14.9078	-9.46045	-6.05774	-4.47083	-2.54822	-1.9989	-1.11389	-1.0376	-0.12207	-0.610352	-0.473022	-0.274658	-0.183105	-0.228882	-0.473022	-0.106812	-0.167847	-0.289917
					0.915527	1.09863	0.549316	1.15967	1.46484	1.64795	1.34277	0.854492	2.2583	1.89209	1.58691	2.0752	1.52588	2.92969	10.376	56.9458	109.68	211.121	150.757	-10.6201	-99.9756	-121.216	-103.149	-79.0405	-55.603	-40.6494	-27.3438	-20.0195	-13.9771	-9.33838	-7.8125	-4.82178	-4.3335	-2.92969	-1.83105	-2.86865	-1.15967	-0.793457	-1.77002	0.12207	-0.915527	-1.0376	0.305176	-0.793457	-0.305176
					0.0610352	-0.183105	-0.12207	0.142415	0.305176	0.467936	0.752767	1.05794	1.36312	1.32243	1.4445	1.87174	2.2583	5.28971	31.6772	83.964	130.412	89.2944	27.2013	-19.1243	-47.1191	-59.1431	-58.5938	-52.8564	-45.695	-38.208	-31.5348	-26.0824	-21.6064	-17.5578	-14.6891	-12.207	-10.0301	-8.26009	-6.91732	-5.83903	-5.06592	-4.3335	-3.68245	-3.23486	-2.95003	-2.56348	-2.31934	-2.01416	-1.89209
					1.091	1.12915	1.14441	1.12915	1.22833	1.25885	1.31989	1.50299	1.67084	1.8158	1.97601	2.37274	2.99835	4.41742	18.6157	57.8156	103.424	147.652	110.458	33.8287	-33.3633	-80.4596	-103.935	-105.629	-91.6977	-73.2727	-56.0913	-42.305	-31.662	-23.4299	-17.4026	-13.2294	-9.95636	-7.30133	-5.34058	-4.14276	-2.99072	-2.0752	-1.43433	-0.907898	-0.602722	-0.1297	0.0686646	0.259399	0.38147
					0.518799	0.386556	0.406901	0.396729	0.528971	0.701904	0.783285	0.915527	0.996908	1.13932	1.42415	1.70898	2.41089	3.83504	16.276	58.8175	115.906	134.806	96.0185	46.8241	5.9611	-23.3256	-43.4977	-56.6406	-63.8123	-65.2364	-61.4217	-54.5349	-46.4478	-38.8591	-32.1452	-26.4079	-21.6064	-17.6188	-14.3738	-11.7391	-9.68425	-8.00578	-6.52059	-5.45247	-4.54712	-3.88591	-3.25521	-2.71606	-2.24813
					0.386556	0.16276	0.0813802	0.0610352	0.183105	0.569661	0.427246	0.386556	0.752767	0.569661	0.854492	1.32243	1.58691	2.82796	17.5578	69.2749	149.272	272.095	148.58	-73.5677	-168.009	-163.981	-127.014	-86.5682	-55.542	-34.2204	-20.7723	-11.9019	-6.32731	-3.15348	-1.09863	0.203451	0.773112	1.36312	1.09863	1.07829	1.24105	0.915527	0.610352	0.488281	0.284831	0.488281	0.244141	0.264486	-0.0406901
					0.388406	0.549316	0.4106	0.454989	0.57706	0.676935	0.882235	0.90443	1.00431	1.17631	1.35942	1.72008	2.08629	3.307	15.9246	72.4765	150.601	179.316	89.0503	-1.79221	-57.2676	-85.5158	-95.065	-91.9522	-80.411	-65.3798	-51.2196	-39.1457	-30.0348	-22.8771	-17.5781	-13.4888	-10.4814	-8.27859	-6.63619	-5.23238	-4.22252	-3.479	-2.72439	-2.43031	-2.0419	-1.74228	-1.46484	-1.19296	-1.12083
					1.5564	1.83105	2.16675	2.19727	1.95313	1.70898	1.84631	2.19727	2.22778	2.56348	2.76184	3.2196	4.11987	5.31006	8.68225	44.6472	146.225	223.511	108.154	-35.4767	-113.007	-137.665	-131.287	-108.49	-81.2836	-58.3954	-41.214	-29.007	-20.6299	-14.74	-10.6201	-8.05664	-6.21033	-4.79126	-3.8147	-2.85339	-2.19727	-1.90735	-1.49536	-1.297	-1.00708	-0.717163	-0.656128	-0.518799	-0.457764
					0.0610352	0.183105	0.274658	0.305176	0.518799	0.915527	0.793457	0.579834	0.793457	0.854492	0.915527	1.2207	1.70898	2.65503	16.2964	56.9763	84.5947	106.354	109.436	79.0405	39.2761	8.11768	-13.7634	-29.3579	-39.9475	-46.3867	-49.8047	-50.6592	-49.0112	-45.3491	-41.0461	-36.6821	-31.8604	-27.5879	-24.3225	-21.1487	-18.0054	-15.5945	-13.7024	-12.0544	-9.91821	-8.81958	-7.90405	-7.08008	-5.76782
					3.05176	3.35693	3.11279	3.11279	2.62451	2.68555	2.13623	1.77002	1.83105	1.64795	1.89209	1.77002	2.01416	2.38037	23.1323	86.5479	200.867	227.478	18.9209	-130.005	-160.889	-129.761	-89.9658	-59.1431	-38.208	-25.0244	-15.7471	-10.376	-7.01904	-4.82178	-3.41797	-2.0752	-1.28174	-0.671387	-0.366211	0.183105	0	0	-0.12207	0.12207	0.610352	0.549316	0.549316	0.488281	0.366211
					1.2207	1.56657	2.2583	2.50244	2.74658	3.27555	3.41797	3.35693	3.51969	3.76383	3.78418	3.84521	3.90625	4.94385	10.8643	93.2414	245.219	249.797	58.7972	-94.0959	-157.369	-163.106	-133.667	-95.3369	-64.0055	-41.8091	-27.4658	-17.6799	-11.1694	-7.52767	-4.82178	-3.15348	-1.99382	-0.996908	-1.15967	-0.854492	-0.671387	-0.549316	-0.325521	-0.244141	0.0203451	-0.264486	-0.488281	-0.183105	-0.12207
					2.31934	2.30916	2.39054	2.30916	2.30916	2.42106	2.58382	2.84831	3.20435	3.5909	4.17074	4.98454	6.45955	9.18579	17.863	54.8808	129.873	156.443	73.1913	-25.116	-90.21	-119.802	-121.318	-102.437	-76.3652	-54.0263	-37.1908	-24.9532	-16.7236	-10.8846	-6.73421	-3.82487	-1.82088	-0.366211	0.579834	1.41398	1.8514	2.12606	2.39054	2.44141	2.57365	2.53296	2.65503	2.51261	2.5533
					1.80926	1.65231	1.65231	1.88337	2.09699	2.08827	2.2583	2.44577	2.88173	3.16511	3.73186	4.52968	5.91605	8.21795	17.6871	53.4537	102.801	105.927	52.233	-6.32586	-50.0924	-75.4874	-83.762	-77.9637	-64.8847	-51.021	-38.9797	-29.3536	-21.7285	-16.0392	-11.8931	-8.64083	-6.09044	-4.19399	-2.83813	-1.70898	-0.902448	-0.348772	0.00871931	0.370571	0.614711	0.88065	0.967843	0.998361	1.06812
					1.95313	2.01416	1.2207	0.915527	1.28174	1.64795	1.52588	1.46484	1.70898	1.95313	2.0752	2.74658	2.92969	4.21143	16.1743	61.4624	93.5059	155.64	155.029	64.5142	-24.9023	-82.2144	-107.727	-112.976	-105.53	-86.6699	-65.918	-48.9502	-35.4614	-26.6724	-19.3481	-13.6108	-10.3149	-7.38525	-5.37109	-3.66211	-2.01416	-1.58691	-0.427246	0.366211	0.671387	0.976563	1.15967	1.52588	2.0752
					0.386556	0.488281	0.508626	0.467936	0.651042	0.569661	0.630697	0.732422	0.671387	0.793457	0.996908	1.24105	1.52588	4.25212	24.5768	71.6553	145.406	123.779	36.5601	-36.1328	-75.7039	-85.2458	-75.5819	-61.6048	-49.1943	-39.2863	-31.1686	-25.1668	-20.1009	-16.1743	-13.387	-11.0067	-9.07389	-7.50732	-6.16455	-5.08626	-4.43522	-3.68245	-2.74658	-2.36003	-2.11589	-1.50553	-1.40381	-1.15967	-0.996908
					0.930786	1.0376	1.28174	1.20544	1.297	1.11389	1.17493	1.41907	1.40381	1.83105	2.13623	2.79236	3.63159	5.43213	16.0065	72.0367	151.413	120.041	21.4081	-56.0455	-94.4672	-101.852	-89.0503	-70.4498	-53.4821	-39.566	-28.9459	-21.1182	-15.152	-10.8948	-7.99561	-5.75256	-4.11987	-2.79236	-1.9989	-1.2207	-0.961304	-0.442505	-0.320435	-0.183105	0.152588	0.228882	0.366211	0.396729	0.457764
					0.366211	0.488281	0.325521	0.488281	0.610352	0.386556	0.935872	1.95313	2.2583	2.56348	2.92969	3.35693	3.96729	5.3304	18.3716	86.5885	148.112	107.727	33.5286	-23.5799	-58.6344	-74.1781	-73.3236	-63.9445	-53.3447	-43.3553	-35.1969	-28.2593	-22.9899	-18.6361	-15.3809	-12.7563	-10.6201	-8.99251	-7.64974	-6.63249	-5.51351	-4.80143	-4.00798	-3.51969	-3.13314	-2.56348	-2.19727	-1.91243	-1.64795
					0.244141	0.244141	0.488281	0.427246	0.366211	1.2207	2.0752	2.56348	3.23486	3.41797	3.479	3.96729	4.76074	5.18799	15.0757	84.1064	186.279	183.777	61.6455	-32.959	-83.252	-102.295	-100.952	-87.5244	-69.7632	-53.2837	-39.7949	-29.3579	-22.3389	-16.6626	-12.207	-9.09424	-6.5918	-4.39453	-3.23486	-2.62451	-2.2583	-1.95313	-1.52588	-1.46484	-0.976563	-0.854492	-0.427246	-0.671387	-0.427246
					0.662667	0.63651	0.62779	1.04632	0.697545	0.845773	0.671387	1.01144	0.88065	1.09863	1.28174	1.35149	1.95313	3.21742	10.5852	68.6558	153.12	158.491	70.4259	1.36893	-35.7404	-54.8619	-64.3747	-66.4934	-61.8461	-53.615	-44.8172	-36.7693	-30.1252	-24.1263	-19.5748	-15.9738	-13.0702	-10.8468	-8.91113	-7.39397	-5.99888	-5.09208	-4.5602	-3.69699	-3.10407	-2.85993	-2.49372	-2.31934	-2.09263
					1.52588	1.61743	1.0376	1.34277	1.67847	1.61743	1.83105	1.95313	2.53296	2.89917	2.99072	3.54004	4.27246	6.2561	17.1814	81.4514	173.889	134.888	21.3013	-63.5681	-103.851	-112.03	-98.999	-77.7893	-57.7087	-41.748	-29.8462	-21.5149	-15.564	-10.9558	-8.30078	-5.98145	-4.69971	-3.63159	-2.83813	-2.34985	-1.70898	-1.49536	-1.46484	-1.09863	-0.610352	-0.549316	-0.610352	-0.152588	-0.12207
					0.0610352	0.427246	0.366211	0.0610352	-0.0610352	0.366211	0.305176	0.610352	1.70898	1.64795	1.83105	2.0752	2.19727	3.54004	25.2686	91.1865	127.93	58.3496	-17.395	-56.3355	-60.8521	-50.9644	-41.0156	-31.9824	-25.0854	-19.9585	-15.4419	-12.8174	-10.5591	-8.66699	-7.26318	-6.28662	-5.79834	-5.12695	-4.63867	-4.08936	-3.72314	-3.2959	-3.05176	-2.86865	-2.38037	-2.2583	-2.13623	-1.89209	-1.52588
					0.976563	0.610352	0.183105	-0.183105	-0.183105	0.12207	0	0.0610352	0.12207	1.0376	1.28174	1.83105	2.2583	2.68555	7.08008	66.5283	193.787	172.913	34.8511	-63.8428	-109.68	-116.455	-100.159	-77.3315	-56.7627	-41.1377	-29.4189	-21.0571	-14.7095	-10.1929	-7.14111	-5.37109	-3.78418	-3.11279	-2.62451	-2.13623	-1.58691	-0.732422	-0.610352	-0.427246	-0.427246	-0.305176	-0.12207	-0.12207	0.183105
					0.0610352	-0.244141	-0.12207	-0.305176	-0.732422	-0.305176	-0.183105	0	0.183105	0.610352	2.2583	3.11279	3.54004	4.27246	11.1084	52.7344	131.104	171.875	59.7534	-49.9268	-99.0601	-98.0835	-78.9795	-59.8755	-44.0674	-33.02	-24.7803	-18.4937	-13.4277	-9.8877	-7.99561	-6.04248	-4.27246	-3.78418	-2.99072	-2.13623	-1.89209	-1.40381	-0.854492	-1.15967	-1.0376	-1.09863	-0.610352	-0.0610352	-0.183105
					0.305176	0.366211	0.549316	0.976563	0.854492	1.09863	1.15967	0.915527	1.46484	1.64795	2.38037	2.68555	2.80762	2.74658	5.92041	50.7202	136.841	245.422	126.831	-68.5425	-156.616	-156.677	-122.253	-81.543	-50.8423	-30.8838	-19.4702	-13.0615	-8.30078	-4.57764	-1.95313	-1.0376	-0.976563	0.0610352	0.183105	0.427246	0.427246	0.0610352	0.610352	1.15967	0.732422	0.854492	0.427246	0.854492	0.793457
					0.508626	0.732422	0.935872	0.549316	0.976563	1.28174	1.26139	0.956217	1.07829	1.01725	1.79036	2.17692	2.42106	3.37728	16.8254	75.0529	161.072	178.609	48.3195	-53.4261	-99.8739	-108.561	-95.2555	-73.7712	-54.0161	-39.0828	-28.0151	-19.7347	-13.9364	-9.80632	-7.14111	-5.10661	-3.45866	-2.46175	-2.0752	-1.36312	-0.915527	-0.732422	-0.590007	-0.244141	-0.264486	-0.142415	0.223796	0.325521	0.528971
					0.549316	0.488281	0	0.427246	0.915527	1.34277	1.40381	1.46484	0.793457	0.610352	1.64795	3.11279	3.41797	3.2959	5.79834	63.9648	210.754	242.615	46.6919	-96.3135	-148.865	-145.142	-113.831	-79.4678	-52.063	-33.3252	-21.3623	-13.3667	-8.30078	-4.88281	-3.17383	-1.46484	-0.305176	0.244141	0.671387	0.427246	0.671387	0.244141	1.0376	0.976563	1.0376	0.976563	0.976563	0.793457	0.854492
					0.0406901	0.0745985	-0.0406901	0	0.0474718	0.230577	0.237359	0.366211	0.569661	0.657823	0.881619	1.15967	1.51232	2.35324	16.1404	76.3753	157.674	240.967	113.376	-67.8236	-157.783	-163.676	-130.107	-90.2235	-59.0142	-37.7536	-23.8851	-14.8858	-9.04677	-5.17443	-2.889	-1.53944	-0.461155	0.0813802	0.339084	0.820584	0.922309	0.868056	0.854492	0.915527	0.922309	1.08507	0.956217	0.732422	0.691732
					0.320435	0.350952	0.350952	0.396729	0.198364	0.289917	0.701904	0.747681	0.762939	1.34277	1.49536	1.75476	2.27356	3.18909	13.9771	77.8351	197.098	240.356	72.5555	-79.6051	-143.6	-146.378	-120.956	-87.9822	-60.0128	-40.2222	-26.7334	-17.1509	-10.9253	-7.18689	-4.69971	-2.73132	-1.41907	-0.88501	-0.228882	0.0152588	0.167847	0.0305176	0.0305176	0.167847	0.167847	0.0305176	0.167847	0.228882	-0.0152588
					0.244141	1.15967	1.28174	1.58691	1.28174	1.15967	1.2207	1.58691	1.52588	1.09863	0.976563	1.28174	1.34277	2.56348	21.7285	97.29	206.604	155.884	8.66699	-89.3555	-121.582	-111.694	-86.9751	-63.1104	-45.2271	-32.2876	-22.8271	-16.3574	-11.4746	-8.54492	-6.34766	-4.88281	-4.27246	-3.54004	-2.80762	-2.38037	-1.70898	-1.58691	-1.46484	-1.15967	-0.854492	-0.793457	-0.854492	-0.488281	-0.427246
					0.109863	0.256348	0.537109	0.512695	0.439453	0.488281	0.744629	0.927734	1.33057	1.52588	1.45264	1.46484	1.57471	2.52686	13.5864	57.4463	143.762	179.785	58.1299	-65.7227	-114.001	-108.203	-84.0332	-61.1816	-43.75	-30.9448	-21.9849	-15.7959	-11.2915	-8.11768	-6.06689	-4.30908	-3.23486	-2.50244	-1.79443	-1.35498	-1.17188	-0.90332	-0.817871	-0.65918	-0.427246	-0.268555	-0.20752	-0.0488281	0.0488281
					-0.244141	0.12207	0.244141	0.335693	0.396729	0.457764	0.610352	0.88501	1.70898	2.31934	2.47192	2.50244	2.65503	3.90625	18.8904	80.719	157.166	131.653	43.4875	-26.886	-69.0613	-85.6018	-81.7871	-69.6106	-56.2134	-44.4641	-34.668	-26.9165	-21.3318	-16.9678	-14.0381	-11.2915	-9.42993	-7.93457	-6.7749	-6.2561	-5.70679	-4.8523	-3.93677	-3.66211	-3.14331	-2.92969	-2.47192	-2.16675	-2.13623
					-0.244141	-0.12207	0.305176	0	-0.366211	0.854492	1.28174	1.34277	2.86865	3.23486	2.86865	3.96729	5.12695	5.24902	10.437	63.4155	173.157	198.364	56.1523	-59.2041	-108.582	-116.821	-103.516	-80.5054	-57.8003	-40.7715	-29.48	-21.7896	-16.2964	-12.6343	-9.58252	-7.8125	-6.22559	-4.94385	-4.27246	-3.479	-3.17383	-2.92969	-2.19727	-1.58691	-1.95313	-1.40381	-1.40381	-0.854492	-0.793457
					0.320435	0.411987	0.198364	0.640869	0.961304	0.717163	1.09863	1.7395	2.05994	2.12097	2.09045	2.73132	3.38745	4.37927	18.6005	78.1403	122.742	82.1075	19.8364	-26.6571	-54.4434	-64.2395	-61.8439	-54.3518	-45.4254	-37.323	-30.426	-24.6887	-19.8975	-16.0217	-13.031	-10.4218	-8.42285	-6.86646	-5.64575	-4.80652	-3.95203	-3.37219	-2.86865	-2.48718	-1.83105	-1.61743	-1.46484	-1.40381	-1.17493
					1.36312	1.48519	1.66829	1.87174	2.2583	2.40072	2.44141	2.50244	2.78727	2.84831	2.64486	2.95003	3.479	4.86247	10.9456	67.3014	168.844	189.535	68.1559	-50.3947	-116.659	-134.603	-119.425	-91.1662	-64.738	-44.3929	-30.1921	-20.7723	-14.2008	-9.74528	-6.73421	-4.67936	-3.2959	-2.19727	-1.52588	-1.24105	-0.915527	-0.691732	-0.691732	-0.366211	-0.142415	-0.142415	-0.244141	0.0406901	0.0406901
					0.396729	0.518799	1.0376	1.09863	1.46484	1.28174	1.49536	1.92261	1.46484	1.61743	2.0752	2.92969	4.05884	6.10352	19.1345	78.4302	167.45	152.466	35.4004	-65.2466	-114.319	-122.009	-106.75	-80.9631	-57.3425	-39.6423	-26.6113	-17.7917	-11.4136	-7.65991	-4.88281	-2.83813	-1.86157	-1.12915	-0.579834	0.213623	0.366211	0.793457	0.549316	0.976563	1.00708	1.00708	1.09863	0.823975	1.09863
					-0.244141	-0.183105	0.12207	-0.366211	-0.183105	0.244141	0.305176	-0.12207	0.976563	2.80762	4.76074	6.7749	7.14111	7.93457	15.686	70.9229	160.645	190.308	80.8716	-24.7192	-89.1113	-113.525	-111.633	-97.7783	-77.4536	-57.251	-41.1987	-30.1514	-21.4233	-15.1978	-11.6577	-8.36182	-6.28662	-4.94385	-3.84521	-3.479	-2.44141	-2.19727	-1.52588	-1.09863	-1.0376	-0.976563	-0.854492	-0.549316	-0.427246
					0	0.549316	0.671387	0.488281	0.183105	0.12207	0	0.854492	1.2207	1.34277	1.0376	1.83105	1.46484	3.54004	27.6489	90.0269	195.557	190.186	80.1392	-11.1694	-64.8193	-95.0317	-109.375	-105.713	-90.6372	-72.1436	-54.6875	-41.9312	-31.25	-22.522	-17.0898	-11.9019	-8.78906	-6.7749	-4.45557	-2.99072	-2.01416	-0.915527	-0.305176	-0.12207	0.976563	0.732422	0.793457	0.976563	0.915527
					1.08846	1.35295	1.34277	1.23088	1.54622	1.59709	1.72933	1.66829	1.77002	1.77002	1.97347	2.72624	3.35693	5.04557	15.92	69.0511	146.281	126.78	33.8745	-43.5588	-85.612	-97.7885	-90.5355	-74.7274	-58.492	-44.1488	-33.1726	-24.8413	-18.3919	-13.9465	-10.5896	-7.99561	-6.22559	-4.64884	-3.82487	-3.02124	-2.43123	-1.99382	-1.75985	-1.27157	-1.10881	-0.9257	-0.813802	-0.488281	-0.335693
					0.244141	0.244141	0.457764	0.579834	0.549316	0.396729	0.457764	1.15967	1.09863	1.00708	1.40381	1.58691	1.98364	2.99072	18.0969	64.6667	125.519	138.184	85.6934	20.7825	-28.0762	-60.4858	-79.3762	-83.7097	-77.4841	-66.5283	-54.0771	-43.396	-34.1187	-26.0925	-20.5383	-16.1133	-12.3901	-9.552	-7.23267	-5.37109	-4.05884	-3.11279	-2.19727	-1.67847	-1.49536	-0.762939	-0.762939	-0.488281	-0.274658
					1.40381	1.15967	0.732422	0.976563	0.915527	1.58691	1.64795	2.2583	2.13623	1.95313	1.70898	2.80762	3.35693	4.88281	10.498	59.8145	151.001	159.485	31.311	-78.186	-122.925	-119.873	-94.9097	-66.4063	-44.6777	-28.9917	-18.6157	-11.9629	-7.75147	-4.94385	-3.23486	-1.89209	-1.09863	-0.793457	0.305176	0.0610352	-0.12207	0.305176	0.366211	-0.183105	0.366211	0.732422	0.427246	0.305176	0.427246
					1.43433	1.2207	1.37329	1.34277	1.40381	1.06812	1.43433	1.89209	1.92261	2.2583	2.28882	2.50244	2.80762	4.05884	8.66699	47.76	149.78	171.509	79.4067	-8.60596	-62.5305	-90.6982	-99.6399	-91.8884	-76.3855	-59.9976	-46.7224	-35.9802	-28.1982	-21.9116	-17.1814	-13.7939	-11.1694	-9.46045	-7.87354	-6.43921	-5.46265	-4.54712	-3.72314	-3.32642	-2.74658	-2.2583	-1.89209	-1.77002	-1.46484
					3.05176	3.32642	3.35693	2.96021	3.02124	2.53296	3.2959	3.26538	3.479	3.63159	4.15039	4.21143	4.97437	6.31714	14.3433	97.9309	214.905	147.705	16.9067	-70.0684	-110.138	-117.706	-104.065	-83.0383	-61.5234	-43.7927	-30.8228	-21.7285	-15.1978	-10.8337	-7.8125	-5.7373	-3.87573	-2.99072	-2.89917	-1.80054	-1.28174	-1.06812	-0.823975	-0.488281	-0.640869	-0.396729	-0.488281	-0.0915527	-0.0915527
					0.620524	0.457764	0.823975	0.88501	0.84432	1.04777	1.39364	1.47502	1.31226	1.35295	1.79036	2.58382	3.479	4.69971	14.7502	81.543	194	174.052	1.29191	-118.174	-151.55	-132.884	-95.3064	-62.3779	-39.3066	-24.7498	-15.8488	-10.3455	-6.63249	-4.39453	-2.95003	-1.86157	-1.41398	-1.01725	-0.80363	-0.488281	-0.335693	-0.111898	-0.223796	0.0508626	0.0508626	0.0101725	0.12207	0.223796	0.295003
					1.58691	2.13623	2.01416	2.0752	2.0752	1.83105	1.70898	1.95313	1.77002	2.01416	1.95313	2.62451	3.17383	3.479	5.61523	38.8794	169.861	325.439	165.527	-54.0771	-157.837	-179.016	-161.682	-121.033	-80.8105	-51.5747	-31.7993	-19.7144	-11.3525	-6.71387	-3.72314	-1.40381	-0.244141	0.549316	0.488281	0.793457	1.2207	1.70898	1.46484	1.52588	1.64795	1.15967	1.09863	1.15967	1.2207
					1.46484	1.77002	1.46484	1.58691	1.34277	1.28174	0.976563	1.34277	1.58691	1.89209	2.80762	3.2959	3.72314	5.61523	13.5498	72.5098	176.575	145.203	25.4517	-57.251	-94.4214	-101.074	-88.1348	-69.5801	-52.6123	-38.269	-27.1606	-20.0806	-14.5264	-10.6201	-8.23975	-6.04248	-5.00488	-4.39453	-3.41797	-2.80762	-2.38037	-2.13623	-1.89209	-1.58691	-1.40381	-1.09863	-0.793457	-0.305176	-0.854492
					1.71509	1.95007	2.03857	2.06909	2.30713	2.31934	2.33459	2.59705	2.95105	3.30811	3.69568	4.36401	5.50537	7.82776	17.0624	63.9893	146.487	152.951	28.653	-82.3425	-128.003	-126.236	-100.073	-69.5648	-45.7306	-29.6844	-19.3207	-12.5031	-8.1604	-5.26428	-3.41797	-1.98669	-0.952148	-0.3479	0.164795	0.588989	0.869751	1.09863	1.05591	1.19934	1.35193	1.42517	1.51367	1.50146	1.55334
					0.87738	0.961304	1.12152	1.06812	1.19019	1.30463	1.31989	1.43433	1.5564	1.54114	1.57166	2.13623	2.31934	3.51715	13.6719	57.7621	129.341	166.534	114.937	38.0402	-25.9018	-66.803	-90.1184	-99.5026	-95.7565	-82.4661	-66.2994	-51.0407	-38.2996	-28.2898	-20.5078	-14.534	-9.93347	-6.46973	-4.23431	-2.18964	-1.01471	-0.1297	0.480652	0.938416	1.25885	1.4801	1.47247	1.48773	1.33514
					1.19019	1.52588	1.61743	1.61743	1.7395	2.22778	2.65503	2.28882	2.16675	2.10571	2.41089	2.83813	2.96021	4.24194	13.4583	71.8079	175.446	182.526	76.0193	-25.8789	-86.0901	-113.098	-115.631	-101.807	-80.9326	-60.3638	-43.8232	-31.4941	-22.1252	-15.5945	-10.6506	-7.14111	-5.5542	-3.26538	-2.22778	-1.12915	-0.671387	-0.244141	0.0610352	0	0.0305176	0.518799	0.457764	0.518799	0.518799
					0.717163	1.05286	0.915527	0.930786	1.14441	1.06812	1.11389	1.20544	1.43433	1.26648	1.43433	1.80054	2.36511	4.36401	19.928	58.1665	115.845	123.276	76.0803	28.1525	-9.24683	-35.5682	-53.6346	-63.7207	-65.5365	-61.0352	-53.772	-46.051	-38.7878	-32.2723	-26.886	-22.2168	-18.4479	-15.2588	-13.0768	-11.0168	-9.01794	-7.58362	-6.46973	-5.63049	-4.86755	-4.05884	-3.76892	-3.17383	-2.71606
					0.427246	0.671387	0.488281	0.305176	0.528971	0.325521	0.569661	0.488281	0.854492	1.42415	1.28174	1.38346	1.91243	2.92969	7.79216	50.1912	145.894	210.734	114.502	9.72494	-57.6172	-94.9911	-111.43	-106.73	-88.0941	-67.3828	-49.1536	-35.6649	-25.8382	-19.043	-13.916	-10.1929	-7.77181	-5.83903	-4.67936	-3.58073	-2.64486	-2.27865	-1.89209	-1.72933	-1.34277	-1.09863	-1.05794	-1.05794	-0.834147
					3.2959	3.90625	2.86865	2.44141	2.31934	2.2583	2.50244	2.56348	2.38037	2.2583	2.2583	2.92969	2.68555	3.72314	7.32422	58.2275	149.292	247.131	143.86	-6.34766	-94.4214	-130.127	-132.996	-113.464	-85.8154	-62.1338	-43.9453	-30.3345	-21.6064	-15.5029	-10.9863	-7.62939	-5.37109	-4.02832	-2.44141	-1.2207	-0.549316	0.183105	0.244141	0.244141	0.793457	0.427246	0.244141	0.427246	-0.0610352
					0.12207	0.0610352	0.244141	0.244141	0.671387	1.95313	2.50244	3.11279	3.96729	4.82178	4.76074	5.00488	5.7373	6.46973	25.0854	80.1392	150.33	143.066	58.8379	-13.6719	-59.9365	-83.4351	-88.501	-79.5898	-66.4063	-52.6123	-41.1377	-31.0059	-23.7427	-18.3105	-14.5264	-11.2915	-8.54492	-7.32422	-6.16455	-5.12695	-4.15039	-3.2959	-3.11279	-2.44141	-2.0752	-1.77002	-1.46484	-1.40381	-1.15967
			nFS Sst		0.683594	0.878906	0.598145	0.646973	0.646973	0.317383	0.57373	1.14746	1.0498	1.23291	1.50146	1.68457	2.22168	3.33252	11.5356	90.1978	203.101	270.911	156.201	-6.65283	-109.375	-144.409	-143.359	-132.849	-113.757	-87.9395	-61.9141	-40.8081	-25.5859	-15.5151	-8.61816	-4.46777	-1.67236	0.305176	1.02539	1.74561	2.17285	2.28271	2.33154	2.36816	2.40479	2.23389	2.11182	1.94092	1.72119
					0.0976563	0.280762	0.439453	0.341797	0.183105	0.45166	0.488281	0.598145	0.671387	1.0376	1.02539	1.2085	1.68457	3.41797	17.3462	64.6851	126.99	121.155	58.667	2.75879	-34.9976	-59.8755	-71.6553	-70.5322	-62.3413	-52.2217	-43.1519	-35.5347	-29.126	-24.1455	-19.9219	-16.333	-13.4766	-11.0718	-9.35059	-7.91016	-6.68945	-5.63965	-4.67529	-3.96729	-3.28369	-2.66113	-2.17285	-1.74561	-1.45264
					0.823975	1.15967	1.15967	1.0376	0.732422	1.12915	1.37329	1.58691	1.58691	2.04468	2.41089	3.11279	3.11279	4.60815	12.5732	85.0525	250.183	285.309	79.2542	-88.6536	-161.194	-170.105	-158.722	-130.737	-94.3909	-63.6597	-41.1377	-26.062	-15.8691	-9.64355	-5.43213	-3.14331	-1.92261	-0.732422	0.0610352	0.396729	0.671387	0.88501	0.701904	1.28174	1.00708	1.09863	0.823975	1.19019	1.25122
					0.488281	0.488281	0.12207	0.244141	0.610352	1.0376	0.488281	-0.305176	0.305176	1.28174	1.77002	2.38037	3.23486	4.57764	6.83594	64.0259	226.013	355.286	97.8394	-137.329	-216.431	-206.177	-166.443	-114.197	-70.8618	-42.6025	-24.6582	-14.0991	-7.44629	-3.66211	-1.83105	-0.305176	0.366211	1.09863	0.854492	1.40381	1.2207	1.64795	1.2207	1.46484	1.64795	1.64795	1.52588	1.40381	1.15967
					0.671387	0.579834	0.732422	0.793457	0.762939	0.762939	1.00708	0.915527	1.40381	1.5564	1.70898	1.92261	2.19727	2.92969	15.0452	68.6646	139.526	156.616	98.6328	30.7922	-21.5454	-53.6804	-72.2656	-82.8857	-83.9233	-75.8667	-63.0493	-50.0793	-39.1235	-29.9683	-22.7661	-17.4866	-13.6108	-10.5591	-8.20923	-6.53076	-5.09644	-3.96729	-2.92969	-2.41089	-2.28882	-2.01416	-1.83105	-1.28174	-0.976563
					1.15967	1.08643	0.976563	1.01318	1.23291	1.41602	2.01416	2.14844	2.13623	2.20947	2.75879	3.57666	4.55322	6.55518	14.3433	59.2529	158.105	232.043	137	-18.4937	-118.591	-153.979	-150.671	-130.225	-99.646	-68.9087	-45.0317	-28.4058	-17.395	-10.0586	-5.24902	-2.41699	-0.317383	1.01318	1.70898	2.22168	2.4292	2.6001	2.84424	2.62451	2.69775	2.56348	2.53906	2.56348	2.45361
					0.778198	0.747681	1.02234	1.00708	1.11389	1.43433	1.67847	1.95313	1.86157	1.78528	1.90735	2.36511	3.15857	4.40979	19.8212	96.817	186.096	167.755	84.0149	9.20105	-41.9006	-70.4803	-84.61	-90.1947	-88.7756	-80.6885	-68.5577	-55.6946	-44.3115	-34.5459	-26.7792	-21.0419	-16.1591	-12.6648	-10.1318	-7.94983	-6.37817	-5.15747	-4.04358	-3.37219	-2.96021	-2.33459	-2.05994	-1.72424	-1.57166
					1.2207	1.89209	2.19727	1.34277	1.15967	1.77002	2.0752	0.915527	3.60107	3.05176	3.54004	4.27246	4.21143	6.95801	22.0337	144.104	293.518	167.419	-10.8032	-109.375	-144.47	-145.447	-129.15	-103.088	-75.1343	-52.9785	-36.377	-24.7192	-16.4795	-11.4746	-7.69043	-4.88281	-3.90625	-2.68555	-1.40381	-0.732422	-0.12207	0.427246	0.244141	0.854492	0.976563	0.244141	0.793457	0.610352	0.732422
					0.645229	0.697545	0.810896	0.959124	1.12479	0.915527	0.959124	1.18583	1.28174	1.45612	1.63051	2.20598	2.96456	4.76074	15.9302	67.8449	114.267	141.445	117.894	55.4897	0.348772	-37.3971	-60.9567	-72.5882	-75.9975	-72.222	-65.2291	-56.0303	-46.4739	-37.5541	-30.1688	-24.2658	-19.5487	-15.8779	-12.8959	-10.3411	-8.39669	-7.0888	-5.79834	-4.7869	-3.93241	-3.41797	-3.13023	-2.77274	-2.27574
					-1.0376	0.305176	0.305176	-0.854492	0.732422	0.427246	-0.610352	0.915527	0.366211	-0.366211	1.15967	0.793457	0	2.19727	15.5029	44.2505	66.2231	60.9741	49.8657	38.208	28.0151	16.7236	5.24902	-4.5166	-10.498	-16.2964	-22.0947	-24.8413	-24.5361	-23.5596	-22.0337	-21.4844	-19.9585	-17.2729	-15.8691	-14.7705	-13.3057	-12.3291	-10.6812	-9.15527	-8.42285	-8.23975	-7.62939	-6.71387	-5.5542
					1.28174	0.793457	0.396729	1.31226	0.88501	0.549316	1.06812	1.31226	1.2207	1.28174	1.5564	2.19727	2.71606	3.72314	12.6648	52.887	109.772	127.991	95.5811	59.3872	30.2124	7.14111	-10.5896	-22.9492	-30.7922	-35.1868	-37.2925	-38.1775	-38.269	-37.323	-36.0718	-33.3862	-30.5481	-27.5879	-23.8647	-21.4539	-17.4866	-16.449	-14.0686	-13.2446	-11.4441	-9.52148	-8.97217	-7.84302	-7.17163
					0.956217	0.488281	1.01725	1.07829	0.834147	1.2207	1.48519	1.52588	0.956217	1.6276	2.05485	1.68864	2.68555	4.17074	19.5109	77.2909	140.93	142.944	91.4714	37.7197	-4.84212	-33.8542	-55.1351	-69.1528	-74.6663	-72.8353	-66.2842	-57.251	-47.1191	-38.3708	-31.0669	-25.0041	-19.8161	-15.8285	-12.5936	-9.86735	-7.32422	-5.79834	-4.25212	-3.11279	-2.62451	-1.83105	-1.4445	-0.610352	-0.203451
					0.900269	0.778198	0.549316	0.701904	0.88501	0.854492	1.06812	1.11389	1.19019	1.52588	1.72424	1.83105	2.33459	4.30298	16.7999	59.5703	98.6176	143.814	150.574	88.089	25.2075	-18.219	-48.4467	-66.2537	-74.3561	-77.6062	-76.0956	-71.5332	-64.743	-55.4047	-44.9677	-35.08	-26.3824	-19.3939	-13.9618	-10.1013	-6.66809	-4.08936	-2.24304	-0.869751	0.274658	0.946045	1.35803	1.64795	1.89209
					1.02234	1.11389	1.40381	1.32751	1.54114	1.7395	1.87683	2.38037	2.28882	2.42615	2.56348	2.76184	3.26538	4.74548	12.6953	64.3311	164.307	206.253	144.302	59.9518	-7.24792	-50.9796	-75.2716	-88.0737	-95.3674	-97.8851	-93.4296	-82.3517	-68.1	-53.8788	-41.7633	-31.6162	-23.6664	-17.9596	-13.3514	-9.93347	-7.30896	-5.23376	-4.01306	-2.91443	-1.86157	-1.2207	-0.823975	-0.473022	-0.289917
					0.854492	0.996908	0.712077	0.610352	0.732422	0.854492	0.956217	1.13932	1.36312	1.13932	1.56657	2.17692	2.97038	3.96729	10.7625	78.9185	226.481	314.555	182.414	42.6229	-32.1248	-68.7256	-86.2834	-91.1865	-91.0238	-85.3678	-78.5929	-72.9574	-64.9414	-56.2744	-46.7326	-37.3942	-29.7038	-22.6034	-16.9881	-13.0005	-9.76563	-7.30387	-5.37109	-3.84521	-2.82796	-2.05485	-1.32243	-0.549316	-0.508626
					0.610352	1.01725	0.956217	0.895182	0.874837	0.895182	1.15967	0.976563	1.26139	1.95313	1.8514	2.13623	2.58382	3.51969	11.3118	55.6844	138.774	205.363	149.414	43.7012	-36.2345	-82.0109	-105.469	-114.36	-110.291	-95.4793	-76.355	-58.0444	-42.5618	-31.0059	-22.644	-16.1743	-11.6577	-8.23975	-5.9611	-4.25212	-2.99072	-2.19727	-1.66829	-1.07829	-0.508626	-0.284831	-0.0406901	-0.0203451	0.325521
					1.06812	1.09863	1.2207	1.40381	1.43433	1.49536	1.49536	1.37329	1.92261	2.04468	2.38037	2.47192	2.86865	4.66919	20.5078	100.922	206.299	183.502	73.8831	-21.3928	-79.3457	-107.513	-116.241	-110.504	-93.6584	-73.9136	-55.7251	-41.4429	-30.1209	-22.2778	-16.2659	-11.9324	-9.00269	-6.46973	-4.82178	-3.60107	-2.80762	-2.13623	-1.67847	-1.19019	-1.00708	-0.793457	-0.488281	-0.488281	-0.152588
					0.793457	0.915527	1.34277	1.15967	0.976563	0.915527	1.15967	1.28174	1.52588	2.13623	1.89209	2.44141	2.44141	3.66211	32.8979	131.897	244.324	205.383	95.398	6.83594	-49.1333	-76.5991	-90.0269	-96.5576	-99.0601	-95.2759	-83.5571	-67.5049	-52.1851	-40.1611	-30.2734	-23.0713	-17.8833	-13.7939	-10.3149	-7.8125	-6.10352	-4.63867	-3.66211	-2.99072	-2.44141	-1.64795	-1.46484	-1.0376	-0.793457
					0.854492	0.732422	0.793457	1.34277	0.549316	0.488281	0.793457	0.915527	1.28174	0.854492	0.732422	1.46484	2.62451	3.84521	21.7285	105.53	205.444	170.959	64.6973	-24.292	-77.5757	-105.042	-115.295	-109.802	-93.2007	-72.937	-54.6265	-41.1377	-30.8228	-22.7051	-16.8457	-12.2681	-9.21631	-7.08008	-5.37109	-4.45557	-3.17383	-2.50244	-1.95313	-1.40381	-1.15967	-0.732422	-0.244141	0.0610352	0.12207
					0.938416	0.717163	0.839233	0.87738	0.846863	0.740051	0.892639	1.05286	1.08337	1.12152	1.18256	1.52588	1.93024	2.46429	9.3689	51.3916	113.144	147.72	113.426	60.3027	14.3051	-18.6844	-41.1987	-56.9077	-66.9479	-69.9081	-66.2537	-58.3572	-48.996	-40.2145	-32.5012	-26.2833	-21.2402	-17.2348	-14.2593	-11.5891	-9.52148	-7.89642	-6.53839	-5.34058	-4.47845	-3.61633	-3.08228	-2.45667	-1.98364
					0.671387	0.671387	0.518799	0.366211	0.396729	0.640869	0.640869	1.37329	1.89209	1.92261	2.50244	2.31934	2.62451	2.89917	7.08008	55.0232	111.908	149.323	125.946	47.5464	-14.2212	-57.251	-81.4514	-90.271	-86.6699	-74.1882	-59.7839	-46.2646	-35.2173	-26.5808	-20.05	-15.686	-12.207	-9.3689	-7.32422	-5.88989	-4.57764	-3.63159	-3.17383	-2.47192	-2.16675	-1.46484	-1.25122	-1.00708	-0.976563
					0.651042	0.671387	0.671387	0.671387	1.01725	1.2207	1.01725	0.793457	1.26139	1.48519	1.40381	1.56657	2.15658	2.70589	10.5387	61.7676	125.366	197.408	176.595	89.0503	10.8846	-41.9718	-70.4142	-84.3709	-90.6779	-92.0003	-87.5041	-77.7995	-65.0228	-51.7375	-40.0594	-30.07	-22.644	-16.8254	-12.5122	-9.50114	-6.87663	-4.9235	-3.25521	-2.27865	-1.48519	-0.813802	-0.569661	0.0203451	0
					0.57373	0.549316	0.65918	0.561523	0.598145	0.830078	1.06201	1.09863	1.13525	1.30615	1.51367	1.51367	2.09961	4.00391	22.229	66.1865	113.611	120.667	88.1592	48.4375	14.1479	-11.3159	-29.9194	-44.0674	-53.8818	-58.7891	-58.4717	-54.3945	-48.4985	-41.7969	-35.2539	-29.3945	-24.3652	-19.7876	-16.0767	-13.0005	-10.4248	-8.39844	-6.90918	-5.62744	-4.61426	-3.62549	-2.86865	-2.12402	-1.81885
					0.774677	0.854492	0.868577	0.953087	0.910832	0.981258	1.10333	1.30521	1.30991	1.45545	1.53527	1.9766	2.53061	3.54943	17.2448	65.0494	95.8581	142.376	186.674	141.301	59.1806	-8.33834	-54.833	-80.5382	-90.9565	-93.4589	-91.8063	-86.7873	-78.5757	-67.0307	-54.2321	-42.0344	-31.574	-23.0619	-16.6391	-11.7422	-7.94866	-5.01427	-3.03298	-1.47893	-0.262921	0.723032	1.24418	1.68081	1.89209
					0.915527	1.00708	1.15967	1.15967	1.20544	1.26648	1.5564	1.46484	1.58691	1.64795	2.04468	2.54822	2.96021	4.66919	19.3329	52.536	79.1473	117.065	124.924	79.361	27.4353	-12.4054	-41.4429	-62.439	-75.2258	-81.1005	-79.8187	-72.6013	-62.1948	-50.8728	-40.8783	-32.3181	-25.4974	-20.3247	-16.3116	-13.0005	-10.4065	-8.56018	-6.92749	-5.79834	-5.15747	-4.34875	-3.66211	-3.43323	-2.96021
					0.411987	0.457764	0.549316	0.50354	0.640869	0.640869	0.610352	0.854492	0.854492	1.15967	1.40381	1.52588	1.89209	3.12805	15.3198	51.0254	92.8803	139.114	126.923	76.5839	25.9705	-14.267	-41.0004	-57.1136	-65.9637	-69.3359	-67.3828	-61.1267	-53.0243	-44.1589	-36.1176	-29.4647	-23.4222	-18.6157	-14.9231	-11.7798	-9.32312	-7.49207	-5.59998	-4.39453	-3.28064	-2.53296	-1.86157	-1.37329	-1.02234
					1.95313	2.11589	1.89209	1.89209	2.31934	2.40072	2.68555	3.54004	3.7028	4.37419	5.41178	6.7749	8.87044	13.1429	21.0368	36.6414	63.1917	90.5355	91.9189	68.278	34.79	2.76693	-21.6471	-39.2253	-51.9002	-60.1196	-63.9648	-64.6362	-62.6017	-57.902	-51.3713	-44.3115	-37.089	-31.0059	-26.001	-21.5861	-18.0868	-15.0553	-12.675	-10.8439	-8.89079	-7.32422	-6.14421	-5.24902	-4.39453
					0	-0.305176	-0.12207	0.244141	0.610352	0.610352	0.488281	0.488281	0.305176	0.732422	0.732422	1.0376	0.915527	1.89209	6.28662	54.3823	96.3135	104.797	167.603	209.106	115.356	18.9209	-48.584	-87.2192	-100.525	-100.769	-98.0225	-93.75	-83.252	-68.4814	-53.4668	-41.3818	-31.7383	-22.7051	-16.9678	-12.7563	-9.52148	-6.34766	-4.63867	-2.80762	-2.19727	-1.28174	-0.915527	-0.305176	0.12207
					0.640869	0.651042	0.478109	0.406901	0.742594	1.01725	0.9257	1.02743	1.07829	1.15967	1.18001	1.54622	2.29899	3.85539	18.0562	68.1356	119.09	176.361	130.28	29.4291	-39.6118	-76.8331	-92.6717	-95.0724	-86.853	-72.9167	-56.9865	-42.806	-31.2805	-22.7356	-16.9271	-12.5122	-9.05355	-6.65283	-4.99471	-3.80452	-2.39054	-1.75985	-1.45467	-1.24105	-0.773112	-0.620524	-0.559489	-0.437419	-0.295003
					0.0991821	0.198364	0.305176	0.305176	0.152588	0.114441	0.267029	0.213623	0.404358	0.465393	0.740051	1.06049	1.44196	3.48663	18.0893	46.2112	65.4526	91.9495	129.86	124.359	79.9179	37.8113	8.81195	-9.41467	-20.9198	-28.3813	-33.5999	-37.2925	-39.3143	-40.9851	-41.4429	-41.2674	-40.5655	-38.7802	-36.3388	-32.8674	-28.862	-25.0397	-21.3699	-18.0664	-15.0757	-12.6648	-10.6506	-9.04846	-7.40051
					0.762939	0.783285	0.691732	0.737508	0.834147	0.879924	0.900269	0.996908	1.14441	1.18001	1.31226	1.64286	2.14132	4.99471	19.2057	41.4174	61.8032	63.6597	52.1749	38.1622	24.5209	12.6445	2.77201	-5.72205	-13.0514	-19.3329	-23.8342	-26.3824	-27.003	-26.5706	-25.4669	-23.6511	-21.7845	-19.8975	-18.0105	-16.1794	-14.5671	-12.9852	-11.6069	-10.4421	-9.30278	-8.30078	-7.49715	-6.68844	-5.9611
					0.683594	0.671387	0.695801	0.793457	0.78125	0.646973	0.585938	0.98877	0.891113	1.08643	1.19629	1.37939	1.61133	2.67334	12.4756	48.2544	95.5688	127.747	103.918	61.0107	21.167	-8.88672	-30.0903	-45.4224	-55.2856	-59.7412	-58.374	-53.3081	-45.9961	-38.7939	-32.2021	-26.123	-21.2524	-17.2363	-14.0137	-11.5723	-9.52148	-7.75147	-6.29883	-5.37109	-4.41895	-3.56445	-2.84424	-2.49023	-2.00195
					0.457764	0.305176	0.793457	1.12915	1.06812	0.946045	1.25122	1.5564	1.95313	1.83105	2.04468	2.44141	2.89917	3.60107	8.36182	55.0537	171.082	189.636	99.6399	10.4675	-49.1638	-81.665	-98.3887	-101.013	-90.7898	-73.9441	-56.7627	-42.511	-30.6702	-22.2473	-16.1133	-10.8032	-7.2937	-5.40161	-3.60107	-2.19727	-1.67847	-0.976563	-0.274658	-0.213623	-0.305176	-0.152588	-0.0610352	-0.0915527	0.0915527
					0.183105	0.183105	0.183105	0.244141	0.427246	0.549316	0.488281	0.183105	0.244141	0.549316	0.0610352	0.610352	0.610352	1.2207	11.2305	36.8042	54.8096	46.5698	27.771	11.1084	-3.11279	-12.6953	-16.7847	-17.7612	-16.7236	-15.2588	-13.9771	-13.0615	-11.8408	-10.9863	-9.70459	-8.42285	-7.99561	-7.44629	-6.89697	-6.53076	-5.92041	-5.18799	-5.12695	-5.12695	-4.69971	-3.84521	-3.41797	-3.54004	-3.72314
					0.152588	0.549316	0.701904	1.19019	1.34277	1.58691	1.52588	1.12915	1.43433	1.34277	1.34277	1.49536	1.77002	2.13623	5.85938	47.1802	125.854	209.259	166.931	76.8738	2.44141	-47.5159	-77.2705	-96.3135	-105.133	-101.074	-87.3718	-70.3735	-54.9011	-41.8091	-32.2876	-24.353	-18.0664	-13.4277	-10.2234	-7.84302	-5.76782	-4.30298	-2.59399	-2.31934	-1.77002	-0.762939	-0.274658	0.0915527	0.0915527
					0.598145	0.952148	0.976563	0.90332	0.927734	1.28174	1.33057	1.33057	1.23291	1.28174	1.3916	1.69678	2.7832	4.3457	16.9922	58.3252	85.6079	119.971	171.24	145.142	63.2813	2.86865	-31.8848	-51.4038	-60.4004	-61.9141	-57.4707	-51.7822	-46.875	-41.7114	-37.3413	-34.2651	-31.2134	-28.1372	-25.3418	-22.8882	-20.6055	-18.75	-16.626	-14.8926	-13.4399	-11.9141	-10.7544	-9.60693	-8.22754
					0.183105	0.0610352	0.0915527	0.274658	0.518799	0.335693	0.518799	0.579834	0.701904	1.34277	1.15967	1.2207	1.19019	2.47192	16.571	50.0488	73.3032	111.481	154.327	129.12	70.282	15.1978	-26.3977	-52.9175	-68.0237	-76.7822	-80.3528	-79.1626	-73.8525	-65.0024	-53.9551	-43.7622	-34.5154	-26.7029	-21.2402	-15.9912	-12.146	-9.0332	-6.74438	-4.88281	-3.44849	-2.34985	-1.61743	-0.671387	-0.366211
					0.891113	0.769043	1.01318	0.891113	0.927734	0.976563	1.06201	1.07422	1.07422	1.0498	1.48926	1.97754	2.17285	3.27148	12.9883	63.147	130.151	181.702	142.188	62.2803	-3.36914	-46.5454	-70.874	-83.9233	-89.3799	-87.793	-78.5889	-64.8926	-51.1719	-39.1235	-29.3945	-22.2534	-16.2964	-11.6333	-8.26416	-6.11572	-4.45557	-2.91748	-1.85547	-1.06201	-0.585938	-0.109863	0.317383	0.390625	0.427246
					1.31226	1.0376	1.09863	1.37329	1.2207	1.5564	1.92261	1.89209	2.04468	2.83813	2.53296	2.80762	3.9978	5.79834	21.0571	132.996	251.007	174.896	47.6074	-42.2974	-90.6067	-110.168	-115.662	-110.779	-96.3745	-78.2471	-60.2417	-44.8914	-33.0811	-23.5291	-16.8762	-11.6577	-8.5144	-5.67627	-3.96729	-3.05176	-1.61743	-1.2207	-0.915527	-0.396729	-0.549316	0.0610352	-0.335693	-0.0610352	0.12207
					1.09863	1.31226	1.31226	1.40381	1.37329	1.64795	1.58691	1.58691	1.95313	1.98364	2.2583	2.47192	3.05176	4.39453	19.0735	87.4329	187.592	199.402	119.843	38.8794	-23.2239	-62.5	-82.1228	-91.5833	-94.9707	-91.3086	-82.0313	-69.2749	-55.6641	-44.0063	-33.8745	-25.9705	-19.7754	-15.0757	-11.5662	-8.88062	-6.83594	-5.21851	-3.72314	-3.02124	-2.31934	-1.5564	-1.31226	-1.00708	-0.854492
					0.732422	0.793457	1.2207	1.0376	0.488281	1.0376	1.2207	0.854492	0.976563	2.01416	2.86865	3.35693	3.72314	4.21143	14.0991	76.2939	175.232	166.504	70.6177	-6.53076	-58.3496	-85.6934	-93.811	-89.9048	-77.4536	-61.7676	-47.0581	-35.9497	-27.0386	-20.0195	-14.6484	-10.498	-7.75147	-6.16455	-4.69971	-3.78418	-3.54004	-2.99072	-2.62451	-2.38037	-1.95313	-2.13623	-2.01416	-1.77002	-2.31934
					0.78125	0.769043	0.823975	0.714111	0.634766	0.756836	0.689697	0.921631	0.909424	0.90332	1.24512	1.30615	1.98364	4.32739	20.4224	43.4814	52.7283	67.1082	102.051	122.937	98.8037	58.4534	23.9746	-1.48926	-19.2139	-31.1218	-38.4216	-42.4988	-44.6838	-45.6909	-45.6421	-44.9097	-43.3228	-40.4297	-36.853	-32.8064	-28.7598	-24.7986	-21.1182	-17.8162	-14.8438	-12.4084	-10.3088	-8.63037	-7.15942
					1.57471	1.80664	2.03857	1.89209	1.9165	2.01416	2.23389	2.52686	2.75879	3.28369	3.4668	3.83301	4.67529	5.88379	11.6699	67.4316	194.189	264.331	122.363	-25.6836	-109.985	-136.841	-136.389	-126.294	-104.968	-77.8076	-53.3447	-34.7534	-22.0093	-13.7451	-8.19092	-4.37012	-2.11182	-0.842285	0.231934	0.744629	0.854492	0.98877	1.30615	1.25732	0.98877	0.976563	0.744629	0.65918	0.598145
					0.549316	0.762939	0.518799	0.488281	0.610352	0.244141	0.579834	0.549316	1.00708	1.19019	1.19019	1.43433	1.61743	2.53296	12.3291	57.0374	103.546	175.812	188.782	97.9004	8.08716	-50.1404	-82.2449	-97.229	-101.074	-96.6797	-84.8084	-70.6177	-55.6641	-42.9077	-32.9895	-25.5127	-19.8975	-15.4419	-11.8713	-9.58252	-7.41577	-5.95093	-4.73022	-4.24194	-3.41797	-2.89917	-2.56348	-2.16675	-1.64795
					1.74967	1.26139	1.48519	1.26139	1.30208	1.42415	1.72933	2.19727	1.97347	2.09554	2.42106	2.54313	3.68245	4.98454	9.94873	61.9507	209.208	297.933	125.203	-37.3739	-119.995	-150.289	-154.622	-142.354	-112.488	-78.8371	-52.2461	-34.1593	-22.1354	-13.9974	-8.38216	-5.1473	-2.92969	-1.42415	-0.508626	0.0406901	0.427246	0.773112	1.30208	1.18001	1.2207	1.60726	1.40381	1.58691	1.58691
			PV	Vm (mV)	-40.1032	-39.9719	-39.8438	-39.6881	-39.4592	-39.2242	-39.0137	-38.8214	-38.6627	-38.4735	-38.2477	-37.973	-37.6312	-37.1521	-35.91	-28.4088	-6.41785	12.3535	12.2528	-0.134277	-16.0339	-30.2155	-40.5731	-47.5098	-51.9684	-54.7607	-56.4697	-57.5501	-58.2153	-58.6456	-58.9081	-59.0332	-59.1156	-59.1705	-59.1827	-59.1858	-59.1553	-59.1339	-59.0881	-59.0271	-58.9508	-58.8898	-58.8226	-58.7433	-58.6761
					-46.6329	-46.5271	-46.4447	-46.3593	-46.2463	-46.1375	-46.0317	-45.9229	-45.816	-45.6889	-45.5139	-45.3084	-45.048	-44.633	-42.8569	-34.6212	-17.2709	0.0813802	5.59794	1.42517	-8.2428	-19.93	-31.2917	-40.7928	-48.0062	-53.2623	-57.0068	-59.6364	-61.4919	-62.7869	-63.6993	-64.3575	-64.8143	-65.1327	-65.3605	-65.5111	-65.6097	-65.6779	-65.7145	-65.7145	-65.6932	-65.6626	-65.626	-65.5904	-65.5457
					-44.1655	-44.043	-43.9148	-43.8059	-43.6401	-43.4163	-43.1778	-42.925	-42.6763	-42.4021	-42.1026	-41.7582	-41.3142	-40.6586	-38.9949	-30.0771	-9.81649	6.93003	11.4115	7.07601	-2.05688	-12.9339	-23.6669	-33.0083	-40.4455	-46.0968	-50.2858	-53.3793	-55.6519	-57.3227	-58.5637	-59.5184	-60.2351	-60.7849	-61.2117	-61.5341	-61.7971	-62.0173	-62.2091	-62.3617	-62.4959	-62.5926	-62.6709	-62.7319	-62.7874
					-40.8691	-40.8386	-40.8447	-40.8752	-40.9241	-40.9424	-40.9546	-40.9973	-40.979	-40.8813	-40.6189	-40.3015	-39.8926	-39.3921	-38.5803	-34.79	-26.6785	-12.6587	1.03149	7.35474	7.70874	4.18701	-1.61743	-8.53272	-15.6494	-22.3328	-28.1616	-33.0566	-37.0544	-40.2527	-42.7979	-44.8059	-46.3623	-47.6196	-48.645	-49.4446	-50.0977	-50.6287	-51.062	-51.416	-51.7273	-52.002	-52.24	-52.4414	-52.6306
					-43.4753	-43.3268	-43.217	-43.1173	-42.9952	-42.8548	-42.6778	-42.5069	-42.3177	-42.0939	-41.8294	-41.5365	-41.1682	-40.6453	-39.7176	-35.1786	-19.9829	-0.191243	7.1818	2.44954	-8.5022	-20.7845	-31.7383	-40.3931	-46.816	-51.414	-54.6529	-56.9458	-58.5551	-59.7148	-60.5469	-61.1206	-61.5438	-61.851	-62.0931	-62.266	-62.3861	-62.4715	-62.5244	-62.5468	-62.5407	-62.5264	-62.5	-62.4654	-62.4044
					-35.609	-35.5186	-35.4365	-35.3488	-35.2545	-35.1246	-34.9781	-34.8161	-34.6236	-34.4166	-34.1741	-33.8906	-33.541	-33.0272	-31.4725	-25.0311	-12.3519	-0.797341	3.71815	2.5779	-1.87711	-7.8985	-14.3005	-20.3963	-25.7846	-30.3489	-34.102	-37.136	-39.5524	-41.4812	-43.0142	-44.2283	-45.2021	-45.9844	-46.6114	-47.1147	-47.5286	-47.8788	-48.164	-48.3926	-48.5857	-48.7504	-48.8908	-49.0118	-49.1194
					-39.209	-39.2151	-39.211	-39.2029	-39.1805	-39.152	-39.1073	-39.0584	-38.9771	-38.8896	-38.7614	-38.6454	-38.4867	-38.1958	-36.7147	-32.0475	-23.704	-13.7777	-6.3029	-2.03044	-0.398763	-0.935872	-3.16772	-6.73625	-11.1125	-15.8875	-20.6319	-25.061	-29.069	-32.6152	-35.7341	-38.4501	-40.7837	-42.7897	-44.5109	-45.9961	-47.2656	-48.3663	-49.3083	-50.1221	-50.826	-51.4445	-51.9836	-52.4536	-52.8768
					-38.5815	-38.4583	-38.3142	-38.1738	-38.0286	-37.8723	-37.7039	-37.5061	-37.3071	-37.1155	-36.8628	-36.5625	-36.2036	-35.7117	-34.4885	-28.8159	-15.8215	4.19312	17.7698	18.1873	9.70703	-2.8894	-15.8862	-27.4414	-36.7712	-43.689	-48.5291	-51.8408	-54.0894	-55.6006	-56.6003	-57.2571	-57.7002	-57.9846	-58.1445	-58.2239	-58.2617	-58.2886	-58.2959	-58.2678	-58.2166	-58.1665	-58.1165	-58.0579	-57.9907
					-41.1682	-40.9607	-40.7837	-40.6738	-40.5762	-40.5334	-40.3809	-40.2283	-39.8865	-39.5874	-39.2822	-38.9648	-38.6719	-38.385	-37.8357	-33.0139	-10.7239	23.4924	32.3853	16.8152	-6.65283	-27.5208	-42.0227	-50.6165	-55.4688	-58.197	-59.6375	-60.2722	-60.5042	-60.5164	-60.376	-60.1318	-59.8694	-59.6252	-59.3933	-59.1431	-58.9539	-58.7341	-58.5205	-58.3313	-58.1482	-57.9956	-57.8308	-57.6782	-57.5501
					-41.1682	-40.9607	-40.7837	-40.6738	-40.5762	-40.5334	-40.3809	-40.2283	-39.8865	-39.5874	-39.2822	-38.9648	-38.6719	-38.385	-37.8357	-33.0139	-10.7239	23.4924	32.3853	16.8152	-6.65283	-27.5208	-42.0227	-50.6165	-55.4688	-58.197	-59.6375	-60.2722	-60.5042	-60.5164	-60.376	-60.1318	-59.8694	-59.6252	-59.3933	-59.1431	-58.9539	-58.7341	-58.5205	-58.3313	-58.1482	-57.9956	-57.8308	-57.6782	-57.5501
					-45.4427	-45.3512	-45.225	-45.1029	-44.9788	-44.869	-44.7449	-44.5964	-44.3949	-44.1813	-43.9372	-43.6544	-43.3187	-42.8589	-41.2292	-32.253	-10.4594	15.7491	25.6917	19.8792	5.25309	-11.0982	-25.828	-37.4308	-45.7316	-51.414	-55.2429	-57.8267	-59.6191	-60.8419	-61.7065	-62.3271	-62.7787	-63.1226	-63.387	-63.5885	-63.7695	-63.9079	-64.032	-64.1256	-64.2151	-64.2863	-64.3433	-64.3738	-64.3778
					-41.7511	-41.6473	-41.4795	-41.3422	-41.2201	-41.095	-41.0004	-40.8417	-40.6433	-40.4694	-40.3015	-40.1062	-39.8346	-39.3951	-38.2782	-32.3242	-18.0359	2.34985	17.5262	22.0459	19.0125	11.3617	1.49231	-8.89282	-18.9514	-28.0029	-35.6232	-41.629	-46.2646	-49.7681	-52.3621	-54.2816	-55.6915	-56.72	-57.4585	-58.0048	-58.3801	-58.6334	-58.8165	-58.9752	-59.0546	-59.1309	-59.1858	-59.2102	-59.1949
					-46.6751	-46.5622	-46.4508	-46.3654	-46.312	-46.2311	-46.1349	-46.0236	-45.9259	-45.8115	-45.6528	-45.4926	-45.2942	-44.9646	-43.158	-36.9186	-24.0433	0.875855	21.579	25.0961	15.9424	1.08032	-14.4745	-28.4821	-39.5752	-47.493	-52.8687	-56.424	-58.7799	-60.2844	-61.2274	-61.7813	-62.0682	-62.2116	-62.1933	-62.0819	-61.9019	-61.7096	-61.4975	-61.2732	-61.0474	-60.8093	-60.5774	-60.3607	-60.1456
					-36.9282	-36.7585	-36.5637	-36.3711	-36.1702	-35.9534	-35.7163	-35.4551	-35.1672	-34.8508	-34.478	-33.9956	-33.3933	-32.5669	-30.8689	-23.7668	-3.28125	20.9314	26.2395	15.2456	-2.0918	-18.5994	-31.5767	-40.5972	-46.4688	-50.157	-52.4063	-53.731	-54.4326	-54.7661	-54.8545	-54.7864	-54.6235	-54.4116	-54.1751	-53.9309	-53.6843	-53.4397	-53.2107	-52.9985	-52.8001	-52.6182	-52.4502	-52.2981	-52.156
					-39.082	-38.9258	-38.7695	-38.5901	-38.4058	-38.23	-38.0322	-37.8394	-37.6135	-37.3779	-37.1082	-36.8164	-36.4575	-35.9631	-34.0283	-25.78	-10.1709	4.95605	11.8591	10.9863	5.25024	-3.18359	-12.5586	-21.5796	-29.4641	-35.9265	-41.0803	-45.1086	-48.2324	-50.6458	-52.5269	-54.0015	-55.1721	-56.0925	-56.8079	-57.3975	-57.8735	-58.2629	-58.5864	-58.8599	-59.0723	-59.2456	-59.4019	-59.5178	-59.5996
					-34.1535	-34.0227	-33.8649	-33.7263	-33.5911	-33.4577	-33.2999	-33.1325	-32.9921	-32.8578	-32.6503	-32.3696	-32.0042	-31.4235	-29.9072	-23.7505	-11.9071	-0.70016	1.77961	-3.02211	-11.5801	-21.0013	-29.3849	-36.002	-40.9119	-44.4589	-47.0276	-48.8307	-50.1299	-51.1039	-51.8267	-52.3507	-52.7588	-53.0247	-53.2602	-53.4398	-53.5505	-53.6272	-53.6944	-53.7336	-53.7266	-53.7441	-53.7223	-53.6883	-53.6673
					-40.9229	-40.8942	-40.8466	-40.7831	-40.733	-40.6836	-40.5988	-40.5103	-40.4211	-40.3149	-40.1849	-40.0427	-39.8779	-39.6082	-37.5128	-27.6904	-4.13025	18.7317	18.3258	1.64551	-17.312	-31.3458	-40.2692	-45.6592	-48.8245	-50.6244	-51.6101	-52.1179	-52.3279	-52.3737	-52.3322	-52.2363	-52.1179	-51.9971	-51.8805	-51.7462	-51.6303	-51.5076	-51.3928	-51.2781	-51.1841	-51.0773	-50.9637	-50.8508	-50.7648
					-44.2004	-44.187	-44.1772	-44.1675	-44.1492	-44.1223	-44.0698	-44.0222	-43.9612	-43.8709	-43.783	-43.6633	-43.5181	-43.2898	-41.8152	-36.5796	-27.1423	-6.08887	12.1655	9.67163	-5.62866	-22.2327	-34.9072	-43.5095	-49.1199	-52.7161	-54.9841	-56.3831	-57.2351	-57.7417	-58.0249	-58.1824	-58.2654	-58.2886	-58.2776	-58.2544	-58.2227	-58.1751	-58.1201	-58.0603	-58.009	-57.948	-57.898	-57.8345	-57.7795
					-34.4772	-34.343	-34.1827	-34.0195	-33.8196	-33.6212	-33.432	-33.2733	-33.049	-32.782	-32.4692	-32.1289	-31.7291	-31.1737	-29.7287	-22.3679	-5.8075	11.2961	16.7816	12.4969	3.4256	-7.13348	-17.2485	-25.827	-32.5638	-37.6328	-41.3849	-44.136	-46.1533	-47.6425	-48.7381	-49.5712	-50.2121	-50.6821	-51.033	-51.3275	-51.5717	-51.7807	-51.9135	-52.0386	-52.1271	-52.2049	-52.2537	-52.269	-52.3071
					-40.4236	-40.2039	-40.0024	-39.8071	-39.6484	-39.4165	-39.1235	-38.8733	-38.6047	-38.2568	-37.8723	-37.5427	-37.1948	-36.6272	-35.0769	-21.3501	12.5061	27.4658	17.6392	-1.82495	-21.0388	-35.3577	-44.2688	-49.5056	-52.5635	-54.2419	-55.1392	-55.5542	-55.6458	-55.6213	-55.5603	-55.4932	-55.4016	-55.2551	-55.1086	-54.9438	-54.8157	-54.657	-54.5044	-54.364	-54.2053	-54.0649	-53.9551	-53.772	-53.6255
					-38.9771	-38.9526	-38.916	-38.8428	-38.7268	-38.5742	-38.385	-37.9517	-37.4268	-36.9507	-36.4624	-35.9131	-35.3577	-34.6497	-33.728	-29.0344	-6.20117	20.3125	22.2351	7.20215	-11.3464	-26.1597	-35.5896	-41.2292	-44.4519	-46.3257	-47.4731	-48.1323	-48.584	-48.877	-49.0662	-49.2065	-49.3408	-49.4751	-49.5483	-49.6521	-49.7437	-49.8535	-49.9146	-49.9023	-49.9207	-49.884	-49.8779	-49.8535	-49.8108
					-33.6304	-33.606	-33.5876	-33.5083	-33.3374	-33.1177	-32.8491	-32.5439	-32.251	-31.9519	-31.7261	-31.488	-31.1462	-30.5481	-27.4902	-18.3289	-2.68555	8.18481	9.80835	4.59595	-3.8208	-12.8418	-20.7703	-27.1545	-32.1411	-36.0046	-38.9648	-41.2292	-43.0237	-44.4336	-45.5933	-46.5454	-47.3572	-47.9797	-48.5107	-48.9502	-49.3103	-49.6033	-49.8352	-50.0244	-50.2197	-50.3662	-50.4334	-50.5249	-50.6287
					-35.4431	-35.4004	-35.3577	-35.3577	-35.3333	-35.2539	-35.1563	-35.0769	-34.9854	-34.8511	-34.7473	-34.6008	-34.3689	-34.1492	-33.4106	-27.9419	-13.1714	-2.92969	-4.90723	-12.6465	-20.3003	-26.4404	-30.9448	-34.3445	-36.7737	-38.623	-39.9597	-40.9485	-41.7175	-42.2913	-42.7124	-43.042	-43.2922	-43.5059	-43.6707	-43.8293	-43.9331	-44.0063	-44.0857	-44.1162	-44.1345	-44.1711	-44.165	-44.165	-44.1772
					-50.6073	-50.592	-50.531	-50.4211	-50.296	-50.1801	-50.0885	-50.0061	-49.9664	-49.8901	-49.7894	-49.6765	-49.5941	-49.4415	-49.0265	-44.9158	-34.79	-15.0635	-0.0976563	-0.405884	-9.50623	-21.0815	-31.6101	-39.8743	-45.9747	-50.3143	-53.4302	-55.6885	-57.3914	-58.6639	-59.6344	-60.3394	-60.8612	-61.2549	-61.5662	-61.8713	-62.0422	-62.1216	-62.1643	-62.1948	-62.2131	-62.2467	-62.2131	-62.1918	-62.1674
					-52.7466	-52.6978	-52.655	-52.594	-52.533	-52.5452	-52.5208	-52.4658	-52.3987	-52.3499	-52.2705	-52.1362	-51.9409	-51.7029	-49.8169	-41.3147	-21.2341	4.67529	8.56934	-4.65698	-22.4121	-37.8235	-48.7244	-55.8411	-60.3699	-63.1714	-64.9658	-66.1682	-66.9373	-67.45	-67.8894	-68.2678	-68.5974	-68.8477	-69.0857	-69.2627	-69.4519	-69.6228	-69.7449	-69.9036	-70.0195	-70.0928	-70.1355	-70.1843	-70.2148
					-32.1655	-32.1411	-32.1472	-32.1838	-32.1777	-32.074	-31.9458	-31.7932	-31.5369	-31.2927	-31.0913	-30.8289	-30.5481	-30.1758	-27.7161	-18.6401	-7.4707	-0.946045	0.506592	-1.60522	-5.56641	-9.99146	-14.2273	-18.0603	-21.4294	-24.3408	-26.8372	-28.9978	-30.835	-32.4158	-33.783	-34.9731	-36.0107	-36.9019	-37.6709	-38.3667	-38.9587	-39.4653	-39.9414	-40.3687	-40.741	-41.0645	-41.3696	-41.6321	-41.8701
					-36.4075	-36.4746	-36.5479	-36.5112	-36.4502	-36.3647	-36.2427	-36.1023	-35.8765	-35.5774	-35.2905	-34.9731	-34.613	-34.1614	-32.8979	-23.584	-4.43115	3.2959	-2.69165	-14.1235	-24.4385	-32.0374	-37.3108	-40.9973	-43.5303	-45.1843	-46.3623	-47.2656	-47.8638	-48.3643	-48.7915	-49.1272	-49.408	-49.6399	-49.8718	-50.0549	-50.2502	-50.415	-50.5676	-50.7202	-50.8301	-50.8972	-50.9033	-50.9399	-50.9705
					-32.4951	-32.4615	-32.4554	-32.4249	-32.4036	-32.3395	-32.2693	-32.1899	-32.0923	-32.0038	-31.8634	-31.6986	-31.4667	-31.0822	-28.6591	-14.7095	6.97327	12.6678	4.32434	-8.64563	-20.3094	-28.894	-34.7107	-38.5803	-41.1713	-42.9565	-44.2383	-45.2179	-46.0236	-46.7163	-47.2687	-47.7234	-48.1323	-48.4772	-48.7671	-49.0051	-49.1913	-49.3988	-49.5605	-49.704	-49.8505	-49.9939	-50.0916	-50.177	-50.2563
					-61.2213	-61.1969	-61.2335	-61.2	-61.087	-60.91	-60.788	-60.6934	-60.5255	-60.2966	-60.022	-59.6985	-59.3781	-58.9661	-57.0831	-50.0946	-34.3536	-14.9841	-6.63452	-11.7798	-23.6908	-36.7615	-47.9889	-56.3599	-62.1887	-66.1621	-68.869	-70.6909	-71.9391	-72.7905	-73.3948	-73.8098	-74.0997	-74.292	-74.4537	-74.5422	-74.649	-74.6826	-74.6887	-74.7253	-74.7437	-74.7101	-74.6704	-74.6399	-74.6033
					-24.353	-24.3713	-24.353	-24.292	-24.2554	-24.176	-24.1089	-23.9563	-23.3765	-22.6746	-22.0581	-21.5942	-21.2402	-20.8923	-19.9402	-10.3943	15.5518	37.3779	39.4775	28.8757	13.9221	-0.360107	-11.5967	-19.4702	-24.7559	-28.302	-30.78	-32.5256	-33.7708	-34.7351	-35.4797	-36.0535	-36.4258	-36.6821	-36.908	-37.1155	-37.3962	-37.5855	-37.7258	-37.8418	-37.97	-38.1287	-38.2507	-38.324	-38.3789
					-49.1272	-49.1821	-49.2493	-49.2676	-49.3042	-49.3652	-49.3652	-49.3347	-49.2554	-48.9929	-48.5657	-48.1323	-47.699	-47.2351	-46.1365	-36.3647	-10.8459	4.43115	-3.25317	-20.575	-36.0596	-46.2646	-52.4536	-56.0791	-58.2275	-59.5093	-60.2966	-60.7605	-61.0535	-61.2305	-61.3709	-61.4807	-61.5479	-61.5356	-61.499	-61.499	-61.4502	-61.4014	-61.2915	-61.2244	-61.2305	-61.2122	-61.1572	-61.0779	-61.0413
					-36.2122	-36.1145	-36.0718	-36.0596	-35.9436	-35.7178	-35.4736	-35.199	-34.8999	-34.5947	-34.2896	-34.021	-33.728	-33.2214	-30.9753	-20.7336	-4.96216	3.96729	5.31616	1.9104	-3.80859	-10.4736	-16.8945	-22.4854	-27.1912	-31.0547	-34.2041	-36.7554	-38.8489	-40.5884	-41.9983	-43.1458	-44.0796	-44.8425	-45.4712	-46.0266	-46.5515	-46.9788	-47.3389	-47.6379	-47.8943	-48.1201	-48.3582	-48.5718	-48.7244
					-41.1621	-40.9302	-40.7471	-40.5396	-40.2893	-39.9963	-39.8132	-39.6301	-39.3921	-39.1846	-39.0137	-38.8	-38.5742	-38.2324	-37.0239	-26.5747	1.92261	20.0745	16.3147	1.2207	-15.8813	-29.8889	-39.4043	-45.4285	-49.176	-51.4954	-52.9602	-53.8025	-54.3884	-54.7852	-55.0354	-55.2368	-55.3955	-55.5115	-55.6396	-55.7556	-55.896	-55.9998	-56.1279	-56.2317	-56.3049	-56.3843	-56.427	-56.4819	-56.5491
					-38.1775	-38.0066	-37.8784	-37.7197	-37.5732	-37.3901	-37.1826	-36.969	-36.8103	-36.6272	-36.4502	-36.1755	-35.8765	-35.5652	-34.9854	-31.3599	-17.2241	3.72314	13.5071	11.9385	4.22974	-5.92041	-16.1804	-25.1709	-32.3608	-37.8967	-42.0715	-45.2332	-47.5769	-49.4202	-50.8911	-52.0386	-53.009	-53.7781	-54.3762	-54.9011	-55.3406	-55.6946	-55.9692	-56.1646	-56.3416	-56.5002	-56.6345	-56.7566	-56.7871
					-39.2395	-39.209	-39.0686	-38.8367	-38.6169	-38.4033	-38.1226	-37.7869	-37.4512	-37.1155	-36.7371	-36.3098	-35.8459	-35.2173	-33.1604	-21.5271	-0.0549316	14.9292	18.1763	13.5437	4.43726	-6.46973	-17.3218	-26.6418	-34.0088	-39.563	-43.6646	-46.698	-48.8831	-50.4578	-51.709	-52.655	-53.363	-53.9978	-54.5288	-54.9133	-55.2307	-55.4443	-55.658	-55.8167	-55.9631	-56.0791	-56.1523	-56.2134	-56.2683
					-34.8572	-34.6436	-34.3079	-33.9844	-33.7708	-33.6121	-33.3801	-33.1604	-32.9834	-32.8186	-32.5928	-32.3181	-31.9763	-31.5369	-30.7678	-27.0569	-8.94165	18.457	25.8301	14.7766	-2.91748	-19.5068	-31.7261	-39.6606	-44.6594	-47.7661	-49.6826	-50.9155	-51.6663	-52.0874	-52.3743	-52.5208	-52.6794	-52.7771	-52.8076	-52.8198	-52.8931	-52.9602	-52.9846	-52.9907	-53.0029	-52.9846	-52.9907	-52.9419	-52.8992
					-40.2386	-40.1215	-39.9878	-39.8608	-39.7058	-39.5435	-39.3896	-39.2224	-39.0222	-38.7927	-38.5181	-38.2214	-37.8375	-37.3157	-36.1658	-30.1178	-13.6151	8.0603	16.4716	10.6207	-2.44934	-16.7499	-29.2297	-38.8562	-45.7867	-50.6488	-54.0588	-56.4709	-58.2105	-59.4922	-60.4559	-61.192	-61.7682	-62.2089	-62.5659	-62.8583	-63.1091	-63.2965	-63.4454	-63.5712	-63.6835	-63.7598	-63.8208	-63.8641	-63.8934
					-43.6872	-43.5346	-43.377	-43.2081	-43.0388	-42.855	-42.6661	-42.4509	-42.2314	-41.9895	-41.7055	-41.3617	-40.963	-40.4157	-38.9951	-27.2339	6.84249	21.7285	2.98032	-22.3249	-39.7045	-48.8577	-53.1777	-55.0187	-55.6675	-55.7181	-55.5042	-55.204	-54.8896	-54.5982	-54.3312	-54.0866	-53.8904	-53.7279	-53.5859	-53.4722	-53.3723	-53.2792	-53.2066	-53.1417	-53.0771	-53.016	-52.9828	-52.9369	-52.9041
					-39.3616	-39.1846	-38.9648	-38.7024	-38.5498	-38.2751	-38.0066	-37.7563	-37.5305	-37.2131	-36.8042	-36.4441	-36.023	-35.4614	-32.0496	-14.386	8.8501	11.0168	-3.21655	-21.4294	-36.1633	-45.8374	-51.709	-55.1636	-57.2144	-58.4595	-59.2102	-59.6069	-59.8694	-60.0098	-60.0586	-60.0769	-60.1257	-60.1807	-60.2295	-60.3027	-60.2844	-60.2722	-60.3088	-60.2783	-60.2417	-60.1868	-60.1563	-60.1013	-60.1013
					-30.9875	-30.9265	-30.7556	-30.6274	-30.3894	-30.1758	-29.7913	-29.5349	-29.2297	-28.894	-28.5706	-28.0701	-27.6001	-26.7822	-24.762	-15.9729	0.0976563	11.0107	11.6699	5.62134	-4.01001	-14.1418	-22.9919	-29.9561	-35.0647	-38.8367	-41.5222	-43.6157	-45.2698	-46.5271	-47.5647	-48.4009	-49.115	-49.6765	-50.1343	-50.5615	-50.8667	-51.1353	-51.3733	-51.5076	-51.593	-51.648	-51.7151	-51.7761	-51.77
					-42.8284	-42.7307	-42.6239	-42.4957	-42.3981	-42.2546	-42.0624	-41.8762	-41.6779	-41.4734	-41.2445	-41.0248	-40.7867	-40.3503	-38.0432	-26.062	-2.84119	11.1664	9.0332	-2.11487	-15.5945	-27.3834	-36.0931	-42.1326	-46.2067	-48.9319	-50.7202	-51.9684	-52.829	-53.4424	-53.8788	-54.2145	-54.4769	-54.7058	-54.9103	-55.069	-55.2368	-55.3925	-55.5023	-55.6335	-55.722	-55.835	-55.896	-56.0028	-56.0547
					-38.2682	-38.0589	-37.847	-37.629	-37.3954	-37.1477	-36.8949	-36.6211	-36.3177	-35.9872	-35.5983	-35.1606	-34.6139	-33.885	-32.2893	-23.475	-2.8704	12.1922	13.4452	4.94472	-7.84825	-20.9106	-31.9824	-40.509	-46.7887	-51.3218	-54.555	-56.9214	-58.6478	-59.913	-60.873	-61.6045	-62.1835	-62.6517	-63.0171	-63.3092	-63.5454	-63.7538	-63.916	-64.039	-64.1401	-64.2055	-64.2718	-64.3276	-64.3485
					-37.4146	-37.2986	-37.1811	-37.0651	-36.9278	-36.7554	-36.5738	-36.3968	-36.2167	-36.0489	-35.8582	-35.5927	-35.2005	-34.642	-33.0948	-23.0621	1.27869	15.9348	10.3806	-5.32837	-21.9147	-34.6252	-42.8268	-47.8058	-50.737	-52.4216	-53.3783	-53.862	-54.0741	-54.1428	-54.1351	-54.0665	-53.9749	-53.8513	-53.743	-53.6331	-53.5431	-53.447	-53.3585	-53.2639	-53.186	-53.1097	-53.035	-52.9709	-52.9266
					-32.9614	-32.8174	-32.6501	-32.4756	-32.3169	-32.157	-31.9568	-31.7004	-31.4404	-31.1304	-30.7825	-30.3857	-29.8938	-29.2212	-27.6697	-20.6335	-2.68921	11.1401	9.1272	-2.76001	-17.0056	-28.9795	-37.428	-42.9663	-46.51	-48.7244	-50.1025	-50.9705	-51.4795	-51.7981	-51.9751	-52.0618	-52.0923	-52.0911	-52.0532	-51.9824	-51.9067	-51.8311	-51.748	-51.626	-51.5039	-51.3928	-51.2732	-51.1621	-51.0437
					-36.4889	-36.3525	-36.1837	-35.9619	-35.7544	-35.5143	-35.2702	-34.9935	-34.7168	-34.4259	-34.1044	-33.7362	-33.2825	-32.6701	-31.5308	-26.3753	-9.03931	9.22648	11.0474	0.459798	-14.1256	-27.1383	-36.617	-42.8731	-46.8567	-49.3408	-50.8952	-51.8514	-52.4394	-52.8137	-53.0518	-53.2105	-53.3305	-53.4058	-53.4912	-53.538	-53.5848	-53.6275	-53.6825	-53.6947	-53.7313	-53.7618	-53.776	-53.8005	-53.8106
					-39.0662	-38.938	-38.8428	-38.7341	-38.6267	-38.4924	-38.3215	-38.114	-37.9028	-37.6758	-37.4438	-37.1387	-36.7847	-36.2683	-34.3274	-27.5586	-13.3667	2.03125	10.0354	10.5994	5.87646	-1.70532	-10.3906	-18.9661	-26.6443	-33.1067	-38.3484	-42.5342	-45.8398	-48.4302	-50.4419	-52.0251	-53.2959	-54.3127	-55.1392	-55.8057	-56.3611	-56.8262	-57.2034	-57.533	-57.8149	-58.0432	-58.2336	-58.4021	-58.54
					-47.2046	-47.0825	-46.8994	-46.7163	-46.521	-46.2891	-46.0754	-45.8557	-45.6238	-45.3308	-45.05	-44.7083	-44.397	-43.9819	-42.7063	-32.9163	-8.54492	24.4995	22.0764	-4.49219	-30.6946	-47.3022	-55.8655	-59.9976	-61.8835	-62.561	-62.7258	-62.6404	-62.3962	-62.1704	-61.8774	-61.6211	-61.3647	-61.145	-60.9558	-60.7971	-60.6689	-60.614	-60.5042	-60.437	-60.4065	-60.3455	-60.3027	-60.2417	-60.1807
					-38.2675	-38.0936	-37.9364	-37.7731	-37.5763	-37.3917	-37.207	-37.0041	-36.7294	-36.4151	-36.0397	-35.6323	-35.1242	-34.3933	-33.11	-26.5503	-0.166321	16.4383	3.72467	-17.984	-34.7961	-44.7128	-50.0229	-52.7054	-53.952	-54.4678	-54.599	-54.5486	-54.4342	-54.277	-54.1046	-53.949	-53.7994	-53.6636	-53.5477	-53.476	-53.3997	-53.3325	-53.2898	-53.241	-53.2181	-53.1967	-53.1937	-53.1662	-53.1464
					-40.0208	-39.9475	-39.9353	-39.9048	-39.9536	-39.917	-39.9292	-39.9353	-39.6729	-39.1663	-38.7573	-38.2996	-37.7991	-37.2131	-36.2183	-29.7302	-14.1602	13.3301	19.2749	1.32446	-21.1853	-37.9089	-47.5037	-52.478	-54.9683	-56.1951	-56.6345	-56.6895	-56.604	-56.3721	-56.1462	-55.896	-55.5969	-55.3711	-55.1514	-54.9438	-54.7424	-54.5837	-54.4006	-54.2419	-54.1138	-53.9917	-53.8696	-53.7537	-53.6255
					-35.3766	-35.2496	-35.1135	-34.978	-34.823	-34.6753	-34.5258	-34.3604	-34.173	-33.974	-33.7488	-33.4821	-33.1555	-32.6843	-31.1584	-24.5795	-10.0482	6.59058	12.608	8.00415	-2.22473	-13.9014	-24.6112	-33.1927	-39.5892	-44.1943	-47.4408	-49.7565	-51.4288	-52.6593	-53.5889	-54.2999	-54.8694	-55.3491	-55.7379	-56.0547	-56.3068	-56.5308	-56.7139	-56.8829	-57.0166	-57.1417	-57.2308	-57.3181	-57.3987
					-48.94	-48.8322	-48.7223	-48.5758	-48.3398	-48.0733	-47.8048	-47.5545	-47.3185	-47.0988	-46.8791	-46.6349	-46.342	-45.931	-43.6747	-33.5836	-15.0798	9.9589	21.1202	17.1265	4.84212	-9.67	-22.9452	-33.5958	-41.4103	-46.9198	-50.7528	-53.4424	-55.3284	-56.665	-57.5989	-58.2316	-58.7179	-59.0474	-59.2855	-59.4625	-59.6008	-59.7229	-59.8104	-59.8755	-59.9141	-59.967	-59.9915	-60.0179	-60.0362
					-36.2976	-36.0107	-35.7361	-35.4919	-35.2804	-35.0606	-34.8796	-34.6965	-34.5032	-34.2529	-33.9844	-33.6711	-33.2825	-32.664	-30.8024	-21.698	-2.9541	11.9507	15.9993	11.4014	1.87174	-9.26717	-19.8588	-28.7231	-35.6934	-40.9932	-44.9544	-47.9268	-50.1587	-51.8595	-53.1596	-54.1585	-54.9825	-55.6559	-56.193	-56.6427	-57.0109	-57.3202	-57.5785	-57.7962	-57.9875	-58.1665	-58.3191	-58.4493	-58.5653
			FS Sst		-36.5906	-36.5875	-36.5326	-36.4594	-36.3586	-36.1816	-35.9161	-35.6079	-35.3729	-35.199	-34.9579	-34.7382	-34.491	-34.0546	-33.2153	-27.2705	-3.66821	21.8933	21.2524	4.01611	-15.5884	-30.8594	-40.4449	-46.0968	-49.3896	-51.358	-52.4841	-53.1189	-53.5004	-53.7903	-53.9764	-54.0802	-54.1718	-54.2969	-54.3976	-54.4769	-54.5227	-54.6082	-54.7211	-54.7943	-54.8492	-54.9072	-54.9805	-55.014	-55.0171
					-35.1573	-35.0952	-35.022	-34.9508	-34.8551	-34.7636	-34.6547	-34.5296	-34.3882	-34.2143	-34.0332	-33.843	-33.6039	-33.2448	-31.8115	-25.9705	-14.6942	-2.36308	5.67627	8.52254	7.06991	2.67029	-3.54513	-10.616	-17.6168	-23.9207	-29.2348	-33.5836	-37.0555	-39.7644	-41.8467	-43.4245	-44.6187	-45.5007	-46.1446	-46.5881	-46.8974	-47.0968	-47.227	-47.2758	-47.2809	-47.2727	-47.2443	-47.1863	-47.1395
					-35.2417	-35.1501	-35.0586	-34.9426	-34.7717	-34.6252	-34.4727	-34.3628	-34.1675	-33.9111	-33.6548	-33.3984	-33.0444	-32.4402	-29.2114	-13.9587	10.2417	17.1082	8.63037	-4.78516	-17.1326	-26.6663	-33.4229	-37.9883	-40.979	-42.9077	-44.1345	-44.8303	-45.2942	-45.5994	-45.7947	-45.8618	-45.8984	-45.9167	-45.9412	-45.9045	-45.8313	-45.7825	-45.7397	-45.7397	-45.6543	-45.5933	-45.5566	-45.4834	-45.3918
					-33.2621	-33.1828	-33.1095	-33.0363	-32.9488	-32.9081	-32.8349	-32.7169	-32.5928	-32.4768	-32.3568	-32.1696	-31.8909	-31.4738	-29.895	-24.5138	-12.8031	0.154622	7.60702	9.26921	6.56738	1.00708	-6.23779	-13.9018	-20.9859	-27.0671	-32.1086	-36.1816	-39.4287	-41.9759	-44.0226	-45.6726	-46.9706	-47.9879	-48.7915	-49.4487	-49.9858	-50.3723	-50.6958	-50.9583	-51.1576	-51.3021	-51.4181	-51.5076	-51.5645
					-38.4023	-38.4064	-38.4033	-38.3809	-38.3413	-38.2802	-38.1724	-38.0585	-37.9171	-37.7777	-37.6048	-37.3851	-37.0951	-36.6842	-35.1644	-25.8921	-1.06303	18.6757	14.4786	-2.61332	-20.5587	-33.8542	-42.3157	-47.5159	-50.7406	-52.7791	-54.1331	-55.0588	-55.7068	-56.193	-56.5623	-56.8654	-57.1238	-57.3313	-57.5195	-57.666	-57.7881	-57.8776	-57.9407	-57.9895	-58.0322	-58.0597	-58.0841	-58.0729	-58.078
					-41.326	-41.217	-41.0985	-40.9781	-40.8526	-40.7166	-40.5962	-40.4576	-40.2858	-40.0626	-39.7932	-39.4967	-39.1192	-38.542	-36.3072	-28.1206	-11.8208	4.07453	8.16825	2.24697	-8.48825	-19.9437	-29.9255	-37.6604	-43.2722	-47.1802	-49.8762	-51.7247	-52.9715	-53.8234	-54.412	-54.7956	-55.0328	-55.2072	-55.3388	-55.4225	-55.4783	-55.5132	-55.5429	-55.5542	-55.5464	-55.5315	-55.5185	-55.5036	-55.4783
					-39.681	-39.6423	-39.6281	-39.622	-39.5874	-39.5569	-39.5203	-39.4857	-39.443	-39.4084	-39.3453	-39.2741	-39.1724	-38.9181	-37.2681	-32.3385	-21.6715	-11.4827	-6.88273	-7.09229	-10.3414	-15.0269	-19.9097	-24.4039	-28.3122	-31.6264	-34.4035	-36.7188	-38.6576	-40.2649	-41.6036	-42.745	-43.7134	-44.5251	-45.2026	-45.8028	-46.3379	-46.8099	-47.2249	-47.585	-47.8984	-48.1893	-48.4334	-48.6511	-48.8647
					-46.8811	-46.6003	-46.3379	-46.0999	-45.8069	-45.5078	-45.1233	-44.751	-44.3726	-44.0002	-43.6096	-43.2068	-42.7246	-42.0654	-40.8936	-33.7463	-13.6108	2.0813	3.56445	-3.79639	-14.3616	-24.7314	-33.5083	-40.21	-45.1172	-48.8037	-51.532	-53.5889	-55.249	-56.4514	-57.5073	-58.2397	-58.9905	-59.436	-59.9487	-60.26	-60.6262	-60.8215	-61.0596	-61.2488	-61.3159	-61.4868	-61.554	-61.5906	-61.731
					-34.5169	-34.3796	-34.1934	-34.0317	-33.9172	-33.6884	-33.493	-33.2474	-32.9697	-32.6416	-32.2876	-31.9061	-31.3492	-30.5283	-28.5568	-18.9621	1.16577	15.126	15.0635	5.67627	-7.39594	-20.2499	-30.5939	-38.0402	-43.1091	-46.5286	-48.7579	-50.2487	-51.1948	-51.8005	-52.2476	-52.5024	-52.7023	-52.8137	-52.9175	-52.9297	-52.9907	-53.038	-53.0655	-53.0838	-53.1067	-53.154	-53.1647	-53.1815	-53.2105
					-51.0437	-50.9338	-50.8789	-50.7629	-50.6165	-50.4517	-50.3174	-50.2319	-50.0061	-49.8169	-49.6582	-49.4507	-49.2981	-49.0051	-47.9675	-42.273	-31.3049	-10.1929	4.88281	3.8208	-6.17676	-18.2983	-28.6133	-36.5173	-42.0776	-46.1426	-48.877	-50.8789	-52.2766	-53.2105	-53.9917	-54.4739	-54.9072	-55.2002	-55.3833	-55.6702	-55.7861	-55.8655	-56.0425	-56.0303	-56.1218	-56.2256	-56.1951	-56.2744	-56.3049
					-30.2714	-30.2897	-30.3019	-30.2877	-30.2572	-30.2104	-30.1351	-30.0293	-29.893	-29.7607	-29.6163	-29.4291	-29.2033	-28.6743	-25.5066	-17.1102	-4.06901	4.86043	7.58057	5.66813	0.956217	-4.95809	-10.8175	-16.1031	-20.6726	-24.4934	-27.6469	-30.2551	-32.4158	-34.1716	-35.6405	-36.8612	-37.8642	-38.6902	-39.3819	-39.9658	-40.4724	-40.9058	-41.274	-41.5975	-41.8925	-42.1488	-42.3808	-42.5822	-42.7714
					-41.1873	-41.0744	-40.9599	-40.847	-40.7242	-40.5983	-40.4663	-40.316	-40.1489	-39.9673	-39.7697	-39.5325	-39.2326	-38.7909	-36.9293	-31.1478	-20.8054	-6.04019	5.00565	8.38852	5.05219	-2.99377	-13.3873	-23.9502	-33.12	-40.4472	-46.0564	-50.2869	-53.4531	-55.7961	-57.5363	-58.8593	-59.8549	-60.585	-61.1191	-61.5334	-61.8324	-62.0399	-62.1834	-62.2742	-62.3344	-62.3474	-62.3405	-62.3146	-62.2765
					-36.4532	-36.4146	-36.3739	-36.3342	-36.2813	-36.2111	-36.1328	-36.0413	-35.9416	-35.8276	-35.6852	-35.5143	-35.2732	-34.8897	-33.2621	-27.3804	-15.7898	-2.30916	7.29268	11.9751	12.5712	10.2386	5.88888	0.224813	-6.15641	-12.6801	-18.8222	-24.2757	-28.9205	-32.8064	-36.0209	-38.6617	-40.8223	-42.5842	-44.0216	-45.1955	-46.1639	-46.9645	-47.6166	-48.1618	-48.6165	-49.0051	-49.3306	-49.6023	-49.8271
					-39.9028	-39.8865	-39.8783	-39.8722	-39.8539	-39.797	-39.7542	-39.7156	-39.6403	-39.5833	-39.4979	-39.3656	-39.207	-38.9242	-37.1684	-30.2409	-15.3137	11.8958	26.7537	19.397	2.59603	-13.8021	-26.5035	-35.1603	-40.7145	-44.1366	-46.2138	-47.404	-48.0367	-48.3521	-48.4619	-48.4416	-48.3643	-48.2279	-48.1181	-48.0103	-47.8862	-47.7946	-47.7336	-47.6847	-47.6563	-47.6074	-47.583	-47.5566	-47.5606
					-37.0744	-37.0195	-36.9784	-36.9329	-36.8752	-36.8075	-36.7193	-36.6289	-36.5284	-36.4108	-36.2749	-36.1029	-35.8942	-35.5635	-33.9711	-26.7234	-11.6633	6.26831	15.1733	14.9941	9.26736	0.715776	-8.79073	-17.986	-26.0271	-32.565	-37.687	-41.6016	-44.605	-46.8928	-48.6506	-49.9994	-51.0476	-51.8754	-52.5391	-53.0623	-53.4846	-53.8325	-54.1049	-54.3479	-54.5521	-54.7263	-54.8728	-54.9921	-55.1042
					-36.9492	-36.7661	-36.5494	-36.3297	-36.1343	-35.9634	-35.7788	-35.5591	-35.3363	-35.08	-34.8038	-34.4818	-34.0698	-33.5388	-32.6706	-28.2059	-13.5834	8.7677	19.5831	16.0355	4.7348	-9.03168	-22.1603	-33.0093	-41.1377	-46.9772	-51.0986	-53.9993	-56.0623	-57.5363	-58.5983	-59.404	-60.025	-60.5042	-60.8856	-61.171	-61.3907	-61.5814	-61.731	-61.8607	-61.9614	-62.0331	-62.0987	-62.1506	-62.1964
					-38.7543	-38.736	-38.7085	-38.678	-38.6261	-38.5345	-38.4552	-38.3972	-38.3179	-38.2324	-38.1409	-38.0188	-37.8479	-37.5824	-35.9528	-30.2551	-21.7957	-11.1603	-0.216675	7.68738	11.615	12.4268	11.0504	8.11462	4.11987	-0.518799	-5.49927	-10.5652	-15.4663	-20.0012	-24.1058	-27.774	-30.9601	-33.7189	-36.1511	-38.266	-40.0665	-41.626	-42.9962	-44.2017	-45.1935	-46.0754	-46.8658	-47.5739	-48.1506
					-45.2759	-44.9402	-44.6289	-44.3176	-44.0552	-43.7866	-43.573	-43.396	-43.2129	-43.0481	-42.8589	-42.6819	-42.4805	-42.2424	-39.9292	-31.2744	-11.1877	11.5601	13.4521	0.45166	-15.6372	-28.6133	-37.6099	-43.5242	-47.345	-49.8474	-51.4221	-52.4597	-53.1616	-53.6438	-53.9856	-54.1931	-54.3213	-54.3884	-54.4251	-54.4067	-54.4067	-54.4067	-54.4189	-54.4067	-54.3457	-54.2908	-54.2358	-54.187	-54.1504
					-50.5717	-50.415	-50.1892	-49.939	-49.6643	-49.3368	-48.995	-48.6593	-48.3073	-47.9309	-47.5525	-47.168	-46.7773	-46.283	-45.1965	-35.8724	-11.3505	13.6292	19.5089	10.0993	-5.63761	-21.9482	-35.3149	-44.8486	-51.2492	-55.4301	-58.1767	-59.9447	-61.0616	-61.8144	-62.2966	-62.6119	-62.8113	-62.911	-63.0269	-63.1124	-63.1795	-63.2345	-63.267	-63.2914	-63.2894	-63.3158	-63.3647	-63.383	-63.3952
					-44.5496	-44.3186	-44.0796	-43.8487	-43.6178	-43.3757	-43.1173	-42.8324	-42.512	-42.1529	-41.7358	-41.2374	-40.5914	-39.6729	-37.8866	-32.3985	-19.4112	-3.76689	3.55225	1.04065	-7.98035	-19.9605	-32.0923	-42.336	-49.9725	-55.3752	-59.0942	-61.5896	-63.2619	-64.3504	-65.0238	-65.4063	-65.5884	-65.625	-65.567	-65.4256	-65.2405	-65.0279	-64.7888	-64.5447	-64.2873	-64.034	-63.7685	-63.5173	-63.2619
					-42.9975	-42.8323	-42.6671	-42.4787	-42.269	-42.0602	-41.8344	-41.5898	-41.3016	-40.9851	-40.6119	-40.159	-39.5673	-38.7456	-36.9768	-31.6315	-21.3514	-10.7588	-5.53545	-6.16804	-11.1773	-18.726	-27.1022	-34.8986	-41.3871	-46.4892	-50.3871	-53.3225	-55.4953	-57.0993	-58.2886	-59.1527	-59.7617	-60.1811	-60.4649	-60.6358	-60.7261	-60.7609	-60.7601	-60.723	-60.6615	-60.5735	-60.4767	-60.3768	-60.27
					-49.4507	-49.2493	-49.1272	-49.0356	-48.9075	-48.7427	-48.5901	-48.4436	-48.2727	-48.0774	-47.8699	-47.5952	-47.3022	-46.8811	-45.2637	-39.1174	-29.7668	-14.2029	1.30005	7.75147	5.26123	-2.96021	-13.7329	-25.0305	-35.5835	-44.2505	-50.8423	-55.7373	-59.2834	-61.9507	-63.8855	-65.2466	-66.2781	-67.0166	-67.5537	-67.9199	-68.1213	-68.28	-68.3228	-68.2861	-68.219	-68.1213	-68.0054	-67.8528	-67.6453
					-36.2752	-36.2264	-36.1755	-36.1287	-36.0636	-36.0067	-35.9436	-35.8704	-35.8032	-35.7239	-35.6242	-35.5001	-35.3475	-34.9223	-32.4646	-25.2991	-10.7585	1.61947	5.27547	1.66219	-5.9082	-14.4328	-21.991	-28.1514	-33.0709	-36.9995	-40.1164	-42.6331	-44.6431	-46.2606	-47.5993	-48.7	-49.6073	-50.3581	-50.9745	-51.4832	-51.9267	-52.2949	-52.5696	-52.8056	-53.0172	-53.1677	-53.3081	-53.4241	-53.5238
					-25.1663	-25.0626	-24.9344	-24.8138	-24.6841	-24.5728	-24.4553	-24.3134	-24.173	-23.9899	-23.7762	-23.497	-23.1339	-22.5906	-20.99	-13.7863	1.35498	13.3591	15.4999	9.89532	0.448608	-9.73663	-18.6417	-25.6866	-31.0349	-34.9915	-37.886	-39.9979	-41.5131	-42.6025	-43.4021	-43.9774	-44.3893	-44.6686	-44.8685	-44.9905	-45.0867	-45.1309	-45.163	-45.1813	-45.166	-45.1431	-45.1065	-45.0668	-45.0211
					-44.0511	-44.0023	-43.9697	-43.9209	-43.8599	-43.8212	-43.7276	-43.5323	-43.3065	-43.0501	-42.7572	-42.4215	-42.0247	-41.4917	-39.6545	-30.9957	-16.1845	-5.41178	-2.05892	-4.41691	-10.2804	-17.6982	-25.0305	-31.425	-36.7594	-41.095	-44.6147	-47.4406	-49.7396	-51.6032	-53.1413	-54.4169	-55.4789	-56.3782	-57.1431	-57.8064	-58.3577	-58.8379	-59.2387	-59.5907	-59.904	-60.1603	-60.38	-60.5713	-60.7361
					-38.4094	-38.385	-38.3362	-38.2935	-38.2568	-38.1348	-37.9272	-37.6709	-37.3474	-37.0056	-36.6577	-36.261	-35.7849	-35.2661	-33.7585	-25.3479	-6.71997	11.6577	17.8223	14.5264	6.20117	-4.02832	-14.1235	-22.876	-29.8523	-35.1807	-39.1602	-42.0959	-44.3298	-45.9961	-47.2168	-48.1262	-48.7854	-49.2249	-49.5483	-49.8108	-50.0366	-50.2319	-50.3845	-50.531	-50.6287	-50.7141	-50.7568	-50.824	-50.8667
					-54.5733	-54.5096	-54.4468	-54.3422	-54.2725	-54.1879	-54.1207	-54.0196	-53.9315	-53.8217	-53.6935	-53.5584	-53.363	-53.0413	-51.9828	-45.1172	-29.8052	-13.9561	-6.91354	-6.77665	-10.3507	-15.8369	-22.2743	-28.9237	-35.1083	-40.4698	-44.9515	-48.6285	-51.641	-54.0536	-56.0111	-57.6085	-58.9155	-60.0002	-60.8913	-61.6307	-62.2306	-62.7398	-63.1958	-63.5655	-63.8759	-64.1619	-64.4113	-64.6432	-64.8525
					-34.2468	-34.0851	-33.9813	-33.847	-33.6792	-33.5175	-33.3344	-33.139	-32.8857	-32.5958	-32.2968	-31.9427	-31.5155	-30.8899	-29.1718	-21.0266	-3.6377	9.85107	11.9812	5.62439	-4.76074	-15.9637	-25.8636	-33.6426	-39.4135	-43.5883	-46.5729	-48.7244	-50.2808	-51.3763	-52.2064	-52.8046	-53.2745	-53.6377	-53.9215	-54.1565	-54.3274	-54.4769	-54.6234	-54.7333	-54.7943	-54.8492	-54.9103	-54.9255	-54.9377
					-49.3164	-49.2737	-49.2371	-49.231	-49.2371	-49.2004	-49.1699	-49.1089	-48.938	-48.7732	-48.5901	-48.3826	-48.1628	-47.8088	-45.282	-36.1633	-23.3704	-17.5354	-19.2749	-24.9084	-30.9937	-36.0901	-40.1917	-43.3899	-45.8984	-47.8943	-49.4385	-50.7202	-51.7761	-52.6428	-53.3691	-53.9978	-54.5776	-55.0903	-55.5542	-55.9631	-56.3355	-56.665	-56.9702	-57.2571	-57.4951	-57.7209	-57.9346	-58.1238	-58.2764
					-33.9111	-33.8501	-33.8318	-33.8501	-33.8684	-33.8562	-33.8562	-33.8501	-33.8379	-33.7341	-33.606	-33.4229	-33.197	-32.9285	-32.2205	-25.5676	-6.18896	11.1023	14.5874	8.20313	-2.76489	-14.4104	-24.4263	-32.1594	-37.8357	-41.9495	-44.8914	-46.9971	-48.468	-49.4873	-50.2014	-50.7385	-51.1169	-51.4282	-51.6907	-51.9043	-52.063	-52.1362	-52.1973	-52.24	-52.2827	-52.3132	-52.3254	-52.3376	-52.3193
					-38.8794	-38.9038	-38.916	-38.9465	-39.0198	-39.0503	-39.0686	-39.0686	-39.0503	-38.9893	-38.7634	-38.4521	-38.0981	-37.6709	-36.5601	-31.2866	-18.1763	-0.98877	4.98657	-0.00610352	-9.91211	-19.7205	-27.6184	-33.606	-38.0127	-41.3147	-43.7927	-45.6421	-46.9849	-47.9736	-48.7732	-49.3774	-49.8047	-50.1831	-50.4822	-50.6958	-50.885	-51.0254	-51.1108	-51.2268	-51.3306	-51.4404	-51.5015	-51.5076	-51.5259
					-43.634	-43.5974	-43.5425	-43.4448	-43.3594	-43.2495	-43.1335	-43.042	-42.8955	-42.7307	-42.4927	-42.2241	-41.9434	-41.6687	-41.0767	-36.0046	-22.3206	2.22168	14.9048	8.05054	-7.61108	-23.2788	-35.5042	-43.6584	-48.7427	-51.8311	-53.7781	-55.0842	-55.9143	-56.3721	-56.5674	-56.6711	-56.7688	-56.7627	-56.7444	-56.7017	-56.6589	-56.6528	-56.5918	-56.4758	-56.4026	-56.3171	-56.2744	-56.189	-56.1096
					-42.8426	-42.7694	-42.6758	-42.6209	-42.5232	-42.395	-42.2689	-42.1733	-42.0654	-41.9637	-41.7847	-41.567	-41.3249	-40.9871	-39.3046	-31.7993	-15.6921	2.16878	7.00073	1.65812	-8.32926	-19.1854	-28.7109	-36.0881	-41.4897	-45.398	-48.1995	-50.1729	-51.5666	-52.5472	-53.2613	-53.772	-54.1178	-54.364	-54.5715	-54.7078	-54.7994	-54.8726	-54.9316	-54.9561	-54.9825	-54.9967	-54.9744	-54.9418	-54.8889
					-49.2554	-49.2065	-49.2065	-49.1638	-49.0723	-48.938	-48.7976	-48.6511	-48.5718	-48.5107	-48.3459	-48.0347	-47.6929	-47.3633	-46.7834	-40.387	-19.3115	4.94995	9.61914	-0.012207	-14.8987	-29.4128	-40.7959	-48.7427	-53.949	-57.2815	-59.4177	-60.7544	-61.5845	-62.0728	-62.3901	-62.5366	-62.5671	-62.5427	-62.4756	-62.4329	-62.3657	-62.3413	-62.2376	-62.1399	-62.0361	-61.9385	-61.8408	-61.7615	-61.676
					-37.8079	-37.8004	-37.8045	-37.8045	-37.7998	-37.7767	-37.753	-37.7163	-37.6594	-37.5936	-37.5054	-37.3895	-37.2382	-37.0029	-35.3889	-27.7513	-11.9839	12.1128	23.4504	16.668	0.889757	-15.4778	-28.4885	-37.5109	-43.4123	-47.1876	-49.5761	-51.0647	-51.9694	-52.4868	-52.7757	-52.9297	-52.9758	-52.9677	-52.9338	-52.8517	-52.7595	-52.6727	-52.5872	-52.4957	-52.4034	-52.2949	-52.1993	-52.1261	-52.0569
					-39.1251	-39.09	-39.0549	-39.0152	-38.9954	-38.9664	-38.8962	-38.8214	-38.7451	-38.6108	-38.4613	-38.2858	-38.0585	-37.7396	-36.3419	-28.5584	-8.84857	15.1871	22.4426	14.4821	0.12207	-14.5157	-26.6113	-35.4095	-41.4108	-45.433	-48.1064	-49.8215	-50.914	-51.6327	-52.1027	-52.3758	-52.5177	-52.6062	-52.6291	-52.6276	-52.6108	-52.6077	-52.6047	-52.5879	-52.5711	-52.5681	-52.5513	-52.5284	-52.5299
					-39.8499	-39.7339	-39.6057	-39.447	-39.3188	-39.2029	-39.0808	-38.9221	-38.7695	-38.6597	-38.562	-38.4338	-38.2996	-38.0432	-35.8704	-26.1414	-5.48096	10.1074	10.9741	2.03857	-10.1196	-21.2891	-29.9866	-36.2976	-40.8203	-44.0491	-46.3318	-47.9675	-49.115	-49.9695	-50.6042	-51.0925	-51.5198	-51.8738	-52.1545	-52.3926	-52.5635	-52.7222	-52.8687	-52.9846	-53.0701	-53.1494	-53.2349	-53.2837	-53.3264
					-34.9585	-34.9329	-34.8792	-34.8279	-34.7839	-34.7351	-34.6606	-34.5679	-34.4348	-34.2822	-34.137	-33.9905	-33.833	-33.5803	-32.2217	-26.4771	-12.1008	5.87769	11.6907	5.11841	-6.28174	-17.1021	-25.5054	-31.6235	-35.9985	-39.093	-41.2915	-42.8711	-44.0002	-44.812	-45.4187	-45.8496	-46.1731	-46.4233	-46.6028	-46.7383	-46.8555	-46.9458	-47.0276	-47.0935	-47.1362	-47.1631	-47.1838	-47.1887	-47.1838
					-48.2452	-48.233	-48.2086	-48.175	-48.1354	-48.0896	-48.0286	-47.9401	-47.7692	-47.5372	-47.29	-47.0398	-46.7743	-46.3837	-44.4946	-36.4227	-20.7062	-7.54089	-3.19214	-5.88074	-12.7869	-21.347	-29.5258	-36.4868	-42.1082	-46.5546	-50.0214	-52.713	-54.8462	-56.543	-57.9468	-59.0759	-60.0189	-60.8124	-61.4899	-62.1155	-62.6862	-63.1714	-63.5651	-63.9313	-64.2456	-64.5386	-64.7858	-65.0024	-65.2161
					-43.6279	-43.6401	-43.6096	-43.6096	-43.6462	-43.5608	-43.4326	-43.2983	-43.0115	-42.688	-42.4011	-42.0044	-41.4917	-40.9668	-39.9231	-33.5815	-16.2659	3.57056	9.18579	3.26538	-7.59277	-19.2749	-29.6265	-37.677	-43.457	-47.5342	-50.4822	-52.6611	-54.2908	-55.5542	-56.5125	-57.2937	-57.9163	-58.4106	-58.8379	-59.1858	-59.5032	-59.7961	-60.0159	-60.1746	-60.3699	-60.5103	-60.6506	-60.7361	-60.8154
					-36.5677	-36.5265	-36.5067	-36.4426	-36.3464	-36.2747	-36.1649	-35.9909	-35.7849	-35.5728	-35.3638	-35.0906	-34.7519	-34.314	-32.4539	-24.6399	-12.3657	-4.15497	-2.17133	-4.83704	-10.2814	-16.7053	-22.8897	-28.3249	-32.8674	-36.5997	-39.6423	-42.1112	-44.101	-45.7031	-47.0062	-48.0484	-48.8907	-49.5773	-50.1419	-50.6226	-51.0178	-51.355	-51.6418	-51.8906	-52.0737	-52.2354	-52.3819	-52.5223	-52.6398
					-41.2679	-41.1194	-40.9526	-40.7654	-40.5396	-40.2995	-40.0553	-39.8051	-39.5264	-39.2415	-38.9771	-38.682	-38.3341	-37.8479	-36.7533	-30.0232	-13.1388	5.81462	12.6302	7.59074	-4.07511	-17.5354	-29.4779	-38.5946	-45.0684	-49.5077	-52.5269	-54.6041	-56.0242	-56.9987	-57.6721	-58.1401	-58.4696	-58.6894	-58.842	-58.9661	-59.0576	-59.1268	-59.196	-59.2326	-59.2468	-59.2611	-59.2855	-59.2814	-59.2773
					-32.5012	-32.4493	-32.3456	-32.2357	-32.0892	-31.9611	-31.8115	-31.6193	-31.4728	-31.311	-31.1035	-30.8105	-30.4047	-29.7943	-27.8809	-20.0378	-3.29285	11.9537	15.4938	8.96912	-2.46277	-14.6637	-25.3387	-33.4351	-39.1693	-43.1335	-45.7947	-47.5739	-48.7152	-49.4812	-49.9695	-50.2533	-50.4395	-50.5524	-50.6104	-50.589	-50.5524	-50.473	-50.4181	-50.3204	-50.2197	-50.119	-50.0092	-49.9268	-49.8169
					-37.8845	-37.9028	-37.8906	-37.9272	-37.9456	-37.9211	-37.8906	-37.9028	-37.8052	-37.5244	-37.0483	-36.3709	-35.6567	-34.8633	-33.2947	-26.2024	-10.1379	8.89282	16.98	14.5081	5.59692	-5.75562	-16.9189	-26.6968	-34.4421	-40.1672	-44.2871	-47.3022	-49.4446	-50.9644	-52.1301	-52.9663	-53.595	-54.0894	-54.4739	-54.8218	-55.0659	-55.2856	-55.4382	-55.5481	-55.6519	-55.7495	-55.835	-55.8899	-55.9326
					-49.2432	-49.1882	-49.1211	-49.0723	-49.054	-49.0417	-49.0417	-48.9563	-48.8342	-48.7	-48.5962	-48.4131	-48.2666	-47.9126	-45.1477	-36.145	-16.5894	2.4292	10.4431	9.32617	2.84424	-6.65894	-17.5964	-28.1677	-37.2314	-44.4458	-49.9146	-54.1077	-57.2327	-59.4849	-61.1938	-62.384	-63.2629	-63.9404	-64.386	-64.6851	-64.8865	-64.978	-65.0085	-65.0208	-64.9231	-64.8499	-64.7705	-64.6729	-64.5813
					-32.7454	-32.6101	-32.4758	-32.3527	-32.1981	-32.0384	-31.8654	-31.6986	-31.5216	-31.3446	-31.1473	-30.8746	-30.5389	-30.0344	-28.4424	-21.5373	-6.90918	5.76884	9.15629	4.80042	-3.76078	-13.5396	-22.5932	-30.0659	-35.9151	-40.33	-43.6473	-46.1314	-47.9706	-49.3652	-50.4242	-51.2238	-51.8463	-52.3112	-52.6937	-52.9958	-53.2389	-53.4383	-53.6143	-53.7415	-53.8523	-53.9449	-54.0263	-54.0751	-54.1087
					-34.0332	-34.0088	-33.963	-33.905	-33.8501	-33.8104	-33.7646	-33.6487	-33.5388	-33.4381	-33.2977	-33.139	-32.9407	-32.6416	-30.8319	-24.3652	-11.8134	2.005	10.5743	12.6526	9.84497	3.79639	-4.14124	-12.5122	-20.2606	-26.9135	-32.3212	-36.6608	-40.0726	-42.6819	-44.7357	-46.347	-47.5861	-48.5413	-49.2645	-49.8016	-50.2075	-50.5188	-50.7385	-50.9064	-51.0559	-51.1322	-51.2085	-51.2573	-51.2848
					-33.4717	-33.3557	-33.2825	-33.1848	-33.0933	-32.9346	-32.7698	-32.5439	-32.3303	-32.135	-31.9641	-31.6834	-31.3477	-30.8594	-29.8096	-23.8281	-8.72803	7.22046	10.3516	2.53296	-9.75952	-21.7468	-31.2378	-37.8784	-42.3462	-45.2454	-47.1069	-48.3032	-49.0784	-49.5728	-49.8962	-50.0855	-50.1953	-50.2747	-50.2441	-50.238	-50.2502	-50.2197	-50.1831	-50.2014	-50.1648	-50.0916	-50.0488	-50.0183	-49.9756
					-36.9324	-36.8103	-36.673	-36.5387	-36.3983	-36.2915	-36.1481	-35.9589	-35.7666	-35.5408	-35.3119	-35.0616	-34.7809	-34.375	-33.5083	-28.7323	-13.7543	3.39661	11.3373	10.4767	4.22363	-4.84619	-14.8102	-23.999	-31.6376	-37.6373	-42.3096	-45.9076	-48.7274	-50.9186	-52.6367	-54.0161	-55.1331	-56.0791	-56.8665	-57.5104	-58.0566	-58.5114	-58.8837	-59.2163	-59.491	-59.7168	-59.906	-60.083	-60.2295
					-41.8304	-41.4978	-41.1621	-40.8661	-40.564	-40.3107	-39.9811	-39.6545	-39.3066	-38.9435	-38.5284	-38.1073	-37.6099	-36.9782	-35.5438	-25.7507	-4.26025	10.5103	12.2009	5.19409	-5.8197	-17.5903	-27.9968	-36.3007	-42.453	-46.8323	-49.9146	-52.0874	-53.6072	-54.6906	-55.4718	-56.0455	-56.4331	-56.7322	-57.0221	-57.2021	-57.3303	-57.4371	-57.5195	-57.5684	-57.6324	-57.6721	-57.7209	-57.7301	-57.7393
					-34.6537	-34.608	-34.5256	-34.4371	-34.3526	-34.2478	-34.1085	-33.961	-33.8298	-33.6945	-33.5154	-33.257	-32.9091	-32.4392	-30.9642	-22.8099	-3.40983	13.9954	14.1246	2.30713	-12.8479	-26.1363	-35.6669	-41.9047	-45.8354	-48.3103	-49.8952	-50.9298	-51.593	-52.0325	-52.3275	-52.5136	-52.655	-52.7568	-52.8371	-52.8859	-52.9195	-52.9307	-52.9531	-52.948	-52.9429	-52.9419	-52.9297	-52.9073	-52.8778
					-44.3115	-44.0979	-43.8965	-43.689	-43.4814	-43.2983	-43.1274	-42.9321	-42.7551	-42.5537	-42.3584	-42.0959	-41.7786	-41.4307	-40.8691	-36.9812	-19.9951	12.5488	29.1016	23.6938	7.91016	-9.99146	-26.1597	-38.2629	-46.344	-51.5015	-54.6814	-56.6528	-57.7881	-58.4595	-58.8318	-58.9722	-58.9966	-58.9417	-58.8928	-58.8135	-58.6914	-58.5205	-58.374	-58.2214	-58.0566	-57.9407	-57.8308	-57.7148	-57.5928
					-35.7117	-35.5347	-35.3882	-35.2295	-35.0952	-34.967	-34.8694	-34.7351	-34.5764	-34.3872	-34.1064	-33.7769	-33.4045	-32.843	-31.488	-24.2371	-6.57959	7.94067	10.4858	4.76074	-4.6814	-14.7888	-23.6023	-30.5603	-35.8215	-39.6484	-42.3645	-44.3726	-45.8252	-46.8872	-47.7112	-48.3154	-48.8159	-49.2554	-49.5972	-49.8779	-50.116	-50.3296	-50.5188	-50.6775	-50.8179	-50.9277	-51.0071	-51.0376	-51.123
					-35.1968	-35.0018	-34.798	-34.5911	-34.3604	-34.1284	-33.895	-33.6353	-33.3401	-33.0093	-32.6398	-32.2034	-31.6528	-30.8701	-29.1638	-22.7649	-8.11615	7.17896	10.0443	1.81	-10.9903	-23.6139	-33.6212	-40.5777	-45.1508	-48.1192	-50.0513	-51.3016	-52.1176	-52.644	-52.9858	-53.1845	-53.2797	-53.3145	-53.298	-53.2391	-53.1522	-53.0423	-52.9367	-52.8168	-52.6816	-52.5391	-52.3877	-52.2375	-52.0822
					-36.8927	-36.7966	-36.6844	-36.5776	-36.4586	-36.3281	-36.1961	-36.0527	-35.8971	-35.743	-35.5858	-35.3722	-35.1402	-34.7885	-33.4213	-27.6451	-14.711	1.94244	13.4361	17.2401	14.65	7.96967	-1.04218	-10.9924	-20.5681	-28.8147	-35.4446	-40.5487	-44.3787	-47.2076	-49.2584	-50.7118	-51.7052	-52.3521	-52.7756	-52.9945	-53.096	-53.109	-53.0609	-52.9671	-52.8412	-52.6932	-52.5459	-52.3972	-52.2636
					-38.4308	-38.2782	-38.1165	-37.9547	-37.7808	-37.558	-37.2925	-37.0636	-36.8469	-36.6364	-36.3953	-36.1115	-35.8154	-35.3912	-34.0454	-26.8646	-9.32007	8.9325	16.5344	13.9465	5.33752	-5.97229	-17.5354	-27.7161	-35.8093	-41.8457	-46.228	-49.3774	-51.59	-53.1494	-54.2145	-54.9286	-55.484	-55.8105	-56.0333	-56.1462	-56.2134	-56.2378	-56.2317	-56.2317	-56.2286	-56.1768	-56.131	-56.0791	-56.0272
					-38.4308	-38.3255	-38.2339	-38.1409	-38.0264	-37.9196	-37.8082	-37.6877	-37.5443	-37.4176	-37.2742	-37.0941	-36.8576	-36.4212	-34.4284	-28.6118	-17.0273	-4.69971	2.90833	5.72357	4.79889	1.24207	-4.1214	-10.4935	-17.0471	-23.1506	-28.5278	-33.1329	-37.0117	-40.239	-42.9276	-45.1492	-46.994	-48.5199	-49.8276	-50.9293	-51.8311	-52.5894	-53.2364	-53.7994	-54.2862	-54.6921	-55.069	-55.3864	-55.658
					-38.206	-38.1388	-38.09	-38.0595	-38.0066	-37.974	-37.9171	-37.8682	-37.7828	-37.6404	-37.5122	-37.3739	-37.1826	-36.8896	-36.1104	-31.0913	-16.5019	4.57153	16.0217	16.9942	11.2325	1.7334	-9.40959	-20.0826	-28.892	-35.6303	-40.5457	-44.1121	-46.696	-48.6003	-49.9919	-51.0112	-51.7883	-52.3722	-52.8402	-53.1982	-53.4627	-53.6906	-53.8798	-54.0527	-54.187	-54.2969	-54.4027	-54.5085	-54.5919
					-46.405	-46.0144	-45.7275	-45.4834	-45.2515	-45.0256	-44.7754	-44.519	-44.281	-44.0552	-43.8293	-43.5364	-43.2678	-42.8955	-42.1631	-36.3403	-21.4111	3.302	17.688	17.0532	7.61108	-5.40161	-18.7012	-30.0476	-38.6292	-44.8425	-49.2371	-52.2705	-54.4312	-55.9814	-57.0801	-57.843	-58.3801	-58.783	-59.0271	-59.1492	-59.2041	-59.1858	-59.1614	-59.137	-59.0576	-59.0149	-58.9905	-58.9478	-58.9539
					-41.5588	-41.5527	-41.5283	-41.5039	-41.4368	-41.2415	-40.9912	-40.6799	-40.2832	-39.801	-39.325	-38.8245	-38.2507	-37.6038	-35.0952	-27.0813	-12.0483	2.2583	8.14209	6.7749	0.78125	-7.56226	-16.4124	-24.3713	-31.012	-36.2732	-40.387	-43.4875	-45.8618	-47.6929	-49.1455	-50.2747	-51.1292	-51.8616	-52.478	-52.9907	-53.4058	-53.7354	-54.0466	-54.2908	-54.4983	-54.6753	-54.8218	-54.9622	-55.0781
			nFS Sst		-41.1401	-41.0522	-40.9924	-40.9277	-40.863	-40.8313	-40.7739	-40.6592	-40.5542	-40.4309	-40.2808	-40.1123	-39.8901	-39.5569	-38.4033	-29.3835	-9.07349	18.0176	33.6377	32.9724	22.0349	7.59399	-6.74194	-20.0269	-31.4026	-40.1965	-46.3879	-50.4688	-53.0273	-54.5789	-55.4407	-55.8875	-56.0547	-56.0242	-55.9216	-55.7471	-55.5298	-55.3015	-55.0684	-54.8315	-54.5911	-54.3677	-54.1565	-53.9624	-53.7903
					-34.4617	-34.4336	-34.3896	-34.3555	-34.3372	-34.292	-34.2432	-34.1834	-34.1162	-34.0125	-33.9099	-33.7891	-33.6206	-33.2788	-31.5442	-25.0757	-12.3767	-0.26123	5.60547	5.88135	2.38159	-3.60596	-10.7715	-17.8247	-24.0588	-29.281	-33.5962	-37.1497	-40.0623	-42.4768	-44.469	-46.1023	-47.45	-48.5571	-49.4922	-50.2832	-50.9521	-51.5161	-51.9836	-52.3804	-52.7087	-52.9749	-53.1921	-53.3667	-53.512
					-36.9568	-36.8408	-36.7249	-36.6211	-36.5479	-36.4349	-36.2976	-36.1389	-35.9802	-35.7758	-35.5347	-35.2234	-34.9121	-34.4513	-33.194	-24.6887	0.32959	28.8605	36.7859	27.9205	11.8011	-5.20935	-21.0815	-34.1553	-43.5944	-49.9603	-54.0741	-56.6803	-58.2672	-59.2316	-59.7748	-60.0891	-60.2814	-60.3546	-60.3485	-60.3088	-60.2417	-60.1532	-60.083	-59.9548	-59.8541	-59.7443	-59.6619	-59.5428	-59.4177
					-31.3782	-31.3293	-31.3171	-31.2927	-31.2317	-31.1279	-31.0791	-31.1096	-31.0791	-30.9509	-30.7739	-30.5359	-30.2124	-29.7546	-29.071	-22.6685	-0.0671387	35.4614	45.2454	31.5125	9.86938	-10.7483	-27.3926	-38.8123	-45.8984	-50.1587	-52.6245	-54.0344	-54.7791	-55.1453	-55.3284	-55.3589	-55.3223	-55.2124	-55.127	-54.9866	-54.8645	-54.6997	-54.5776	-54.4312	-54.2664	-54.1016	-53.949	-53.8086	-53.6926
					-38.9557	-38.8977	-38.8245	-38.7451	-38.6688	-38.5925	-38.4918	-38.4003	-38.2599	-38.1042	-37.9334	-37.7411	-37.5214	-37.2284	-35.7239	-28.8574	-14.9048	0.756836	10.6201	13.6993	11.5448	6.17676	-1.0498	-9.33838	-17.7307	-25.3174	-31.6223	-36.6302	-40.5426	-43.5394	-45.816	-47.5647	-48.9258	-49.9817	-50.8026	-51.4557	-51.9653	-52.3621	-52.655	-52.8961	-53.125	-53.3264	-53.5095	-53.6377	-53.7354
					-33.1885	-33.0798	-32.9822	-32.8809	-32.7576	-32.616	-32.4146	-32.1997	-31.9861	-31.7651	-31.4893	-31.1316	-30.6763	-30.0208	-28.5864	-22.6611	-6.85059	16.3538	30.0537	28.2043	16.3452	0.947266	-14.1199	-27.1423	-37.1069	-43.9978	-48.501	-51.3416	-53.0811	-54.0869	-54.6118	-54.8535	-54.8853	-54.7839	-54.613	-54.3909	-54.148	-53.8879	-53.6035	-53.3411	-53.0713	-52.8149	-52.561	-52.3047	-52.0593
					-37.4405	-37.3657	-37.2635	-37.1628	-37.0514	-36.908	-36.7401	-36.5448	-36.3586	-36.1801	-35.9894	-35.7529	-35.437	-34.996	-33.0139	-23.3322	-4.7226	12.0529	20.4544	21.3745	17.1844	10.1364	1.67542	-7.34406	-16.2216	-24.2905	-31.1462	-36.7157	-41.1469	-44.6014	-47.2794	-49.3835	-50.9995	-52.2659	-53.2791	-54.0741	-54.7119	-55.2277	-55.632	-55.9692	-56.2653	-56.4987	-56.7047	-56.8771	-57.0343
					-37.3169	-37.1277	-36.908	-36.7737	-36.6577	-36.4807	-36.2732	-36.1816	-35.8215	-35.5164	-35.1624	-34.7351	-34.314	-33.6182	-31.4148	-17.0044	12.3474	29.0894	28.009	17.0715	2.62451	-11.9202	-24.8352	-35.144	-42.6575	-47.9553	-51.593	-54.0649	-55.7129	-56.8604	-57.6294	-58.1177	-58.5083	-58.7769	-58.9172	-58.9905	-59.0027	-58.96	-58.9355	-58.8501	-58.7524	-58.728	-58.6487	-58.5876	-58.5144
					-33.3365	-33.2668	-33.1857	-33.0898	-32.9773	-32.8857	-32.7898	-32.6712	-32.5431	-32.3975	-32.2344	-32.0138	-31.7174	-31.2413	-29.6483	-22.8638	-11.4371	2.70735	14.4967	20.0457	20.0806	16.3409	10.2452	2.98636	-4.61339	-11.8356	-18.3585	-23.9615	-28.6089	-32.3643	-35.3812	-37.8078	-39.7627	-41.3504	-42.64	-43.6741	-44.5138	-45.2227	-45.8025	-46.2812	-46.6745	-47.0163	-47.3293	-47.6066	-47.8341
					-31.3477	-31.3171	-31.2866	-31.3721	-31.2988	-31.2561	-31.3171	-31.2256	-31.189	-31.2256	-31.1096	-31.0303	-31.0303	-30.8105	-29.2603	-24.8352	-18.2129	-12.1155	-7.12891	-3.30811	-0.506592	1.16577	1.69067	1.23901	0.189209	-1.44043	-3.6499	-6.13403	-8.58765	-10.9436	-13.147	-15.2954	-17.2913	-19.0186	-20.6055	-22.0825	-23.4131	-24.646	-25.7141	-26.6296	-27.4719	-28.2959	-29.0588	-29.7302	-30.2856
					-29.2755	-29.1962	-29.1565	-29.0253	-28.9368	-28.8818	-28.775	-28.6438	-28.5217	-28.3936	-28.2379	-28.0182	-27.7466	-27.3743	-26.1078	-20.8191	-9.84192	2.95715	12.5153	18.454	21.4752	22.1893	21.1304	18.8354	15.7562	12.2375	8.5083	4.69055	0.863647	-2.86865	-6.47583	-9.81445	-12.8693	-15.6281	-18.0145	-20.1599	-21.9086	-23.5535	-24.9603	-26.2848	-27.4292	-28.3813	-29.2786	-30.0629	-30.78
					-36.4156	-36.3668	-36.2651	-36.1572	-36.0738	-35.9517	-35.8032	-35.6506	-35.555	-35.3923	-35.1868	-35.0179	-34.7493	-34.3323	-32.3812	-24.6521	-10.5591	3.73535	12.8825	16.6545	16.1702	12.7848	7.27132	0.356038	-7.1106	-14.3941	-21.0225	-26.7476	-31.4596	-35.2966	-38.4033	-40.9037	-42.8853	-44.4682	-45.7275	-46.7143	-47.4467	-48.0265	-48.4517	-48.763	-49.0255	-49.2086	-49.353	-49.4141	-49.4344
					-32.5012	-32.4234	-32.3685	-32.2983	-32.2098	-32.1243	-32.0175	-31.9061	-31.7871	-31.6345	-31.4621	-31.279	-31.0455	-30.6152	-28.9352	-22.9782	-13.1165	1.26495	16.3223	25.1312	27.652	25.8301	20.9854	14.36	6.92444	-0.836182	-8.44574	-15.5991	-22.0734	-27.6138	-32.1106	-35.6186	-38.2568	-40.1962	-41.5924	-42.6025	-43.2693	-43.6783	-43.9026	-43.9896	-43.9621	-43.8675	-43.7317	-43.5669	-43.3777
					-40.5304	-40.419	-40.2786	-40.1459	-39.9918	-39.8178	-39.6301	-39.3921	-39.1632	-38.9206	-38.6642	-38.3881	-38.0615	-37.587	-36.3174	-29.8843	-13.4537	7.17163	21.6019	27.597	26.8723	21.7743	14.2471	5.43976	-4.09698	-13.8855	-23.2285	-31.4636	-38.2736	-43.6615	-47.8378	-50.9995	-53.3661	-55.162	-56.4972	-57.4905	-58.2214	-58.7448	-59.1461	-59.4376	-59.6237	-59.7458	-59.8282	-59.8755	-59.9045
					-41.7664	-41.6667	-41.5955	-41.5344	-41.4612	-41.3757	-41.2801	-41.1662	-41.0299	-40.9159	-40.7593	-40.5416	-40.2445	-39.8478	-38.7716	-30.8797	-8.23161	23.2239	41.4653	45.7275	42.5151	35.6425	27.0142	17.8955	8.79313	0.256348	-7.60295	-14.8987	-21.3928	-27.0203	-31.6935	-35.4329	-38.4033	-40.6637	-42.3625	-43.6625	-44.6391	-45.3695	-45.9066	-46.2911	-46.5739	-46.7794	-46.9116	-46.9666	-47.0174
					-36.7554	-36.6536	-36.558	-36.4685	-36.381	-36.2915	-36.1755	-36.0779	-35.9517	-35.7564	-35.5713	-35.3577	-35.0993	-34.7473	-33.6161	-28.0477	-14.1703	6.36597	21.3074	25.6775	22.054	13.8529	3.30607	-8.12988	-19.1589	-28.7069	-36.3424	-42.1468	-46.403	-49.5036	-51.768	-53.3854	-54.5512	-55.3752	-55.9713	-56.3965	-56.6956	-56.9153	-57.0821	-57.1899	-57.2408	-57.2693	-57.2734	-57.2754	-57.2428
					-37.5519	-37.442	-37.3199	-37.1796	-37.0361	-36.8866	-36.7371	-36.5997	-36.4075	-36.203	-35.965	-35.7178	-35.4309	-34.964	-32.9132	-22.821	-2.19116	16.1591	23.5474	21.4081	13.4735	2.72217	-8.90198	-19.9524	-29.3182	-36.7096	-42.2821	-46.4264	-49.4385	-51.6663	-53.2928	-54.4861	-55.3864	-56.0333	-56.5155	-56.8756	-57.1564	-57.37	-57.5378	-57.6569	-57.7576	-57.8369	-57.8857	-57.9346	-57.9498
					-41.7969	-41.7053	-41.571	-41.4551	-41.3574	-41.2659	-41.1499	-41.0217	-40.8691	-40.6555	-40.4663	-40.2222	-39.978	-39.6118	-36.322	-23.1323	1.30005	21.8384	31.3782	32.0618	27.1484	19.4885	10.4858	0.830078	-9.07593	-18.6035	-26.9592	-33.7097	-38.9282	-42.9443	-45.9717	-48.2788	-50.0671	-51.4465	-52.478	-53.2593	-53.8696	-54.3335	-54.6997	-54.9988	-55.2429	-55.4077	-55.5542	-55.658	-55.7373
					-37.1948	-37.1216	-37.0422	-36.908	-36.853	-36.8042	-36.7249	-36.6333	-36.5051	-36.4197	-36.3464	-36.2	-35.9375	-35.553	-33.3801	-22.8271	-2.28271	14.8132	21.283	18.8538	11.0962	0.592041	-10.9375	-21.9177	-31.2378	-38.5315	-43.9941	-48.1079	-51.1902	-53.4607	-55.1453	-56.3721	-57.2937	-58.0017	-58.5388	-58.9844	-59.3018	-59.552	-59.7473	-59.8877	-60.0037	-60.0769	-60.1013	-60.0952	-60.083
					-41.6008	-41.5291	-41.4452	-41.3574	-41.2727	-41.1987	-41.1095	-41.0042	-40.8958	-40.7837	-40.6654	-40.5128	-40.3198	-40.0734	-39.1365	-33.9973	-22.683	-7.91092	3.4317	9.46198	10.8925	9.02405	4.90417	-0.786591	-7.48138	-14.4722	-21.0976	-26.9333	-31.8329	-35.8543	-39.1045	-41.7328	-43.8568	-45.5803	-47.0062	-48.1651	-49.1173	-49.9069	-50.5608	-51.0948	-51.5427	-51.9043	-52.2125	-52.4582	-52.6566
					-41.9952	-41.9281	-41.8762	-41.8396	-41.7999	-41.7358	-41.6718	-41.5344	-41.3452	-41.153	-40.9027	-40.6708	-40.4083	-40.1184	-39.4104	-33.9081	-22.7173	-7.78503	4.80957	9.56421	8.14209	2.41699	-5.72815	-14.7552	-23.4222	-30.8411	-36.8195	-41.4459	-44.9677	-47.6257	-49.6307	-51.1993	-52.42	-53.3569	-54.0894	-54.6783	-55.1361	-55.4993	-55.8167	-56.0638	-56.2805	-56.427	-56.5521	-56.6528	-56.7505
					-37.6648	-37.5977	-37.5305	-37.4634	-37.3617	-37.2396	-37.1379	-37.0585	-36.9324	-36.7839	-36.6435	-36.4868	-36.2712	-36.0006	-34.9467	-28.7699	-16.2333	3.50749	21.167	30.072	31.1605	26.9633	19.9219	11.4848	2.41699	-6.78304	-15.5334	-23.3134	-29.8157	-34.9894	-38.9954	-42.0024	-44.2668	-45.9493	-47.2005	-48.1506	-48.8383	-49.3306	-49.6562	-49.884	-50.0326	-50.1139	-50.1709	-50.1689	-50.1689
					-33.916	-33.8611	-33.7952	-33.739	-33.6792	-33.5962	-33.49	-33.3801	-33.2666	-33.136	-32.9846	-32.8333	-32.6233	-32.2229	-30	-23.3813	-12.0203	0.0463867	8.8623	13.7061	15.1208	13.9893	10.9973	6.59058	1.20239	-4.67651	-10.5237	-15.9631	-20.813	-24.9927	-28.5181	-31.4575	-33.894	-35.8728	-37.4805	-38.7805	-39.823	-40.6628	-41.3538	-41.9165	-42.3779	-42.7405	-43.0273	-43.2397	-43.4216
					-38.2756	-38.1902	-38.1033	-38.008	-37.9169	-37.8188	-37.7085	-37.5779	-37.4469	-37.3014	-37.1479	-36.9502	-36.6972	-36.3422	-34.6177	-28.1128	-18.527	-4.28936	14.378	28.5081	34.4262	33.5923	28.109	20.0552	10.9596	1.61368	-7.56695	-16.2457	-24.1033	-30.8063	-36.2295	-40.433	-43.5904	-45.8966	-47.5605	-48.7347	-49.5296	-50.031	-50.3343	-50.4822	-50.5085	-50.4362	-50.3117	-50.1437	-49.9545
					-39.6576	-39.5569	-39.4409	-39.325	-39.2044	-39.0778	-38.9221	-38.7756	-38.6169	-38.4521	-38.2477	-37.9929	-37.6968	-37.2299	-35.2966	-30.043	-22.1283	-10.4218	2.07062	10.0067	12.7502	11.5097	7.36542	1.12152	-6.40106	-14.5111	-22.493	-29.7531	-35.9726	-41.0599	-45.1477	-48.3795	-50.9293	-52.9617	-54.5929	-55.8929	-56.9336	-57.7896	-58.4824	-59.0622	-59.5779	-60.0128	-60.379	-60.7224	-61.0184
					-42.4377	-42.392	-42.337	-42.2867	-42.2226	-42.1585	-42.0975	-42.012	-41.9266	-41.8106	-41.6702	-41.5176	-41.3284	-41.0156	-39.4836	-34.3811	-25.0931	-11.1816	1.51062	9.16901	11.7661	10.3394	6.23932	0.527954	-6.06842	-13.002	-19.7403	-25.853	-31.1554	-35.5713	-39.183	-42.1295	-44.4717	-46.3333	-47.8256	-49.0036	-49.9359	-50.6851	-51.2451	-51.6846	-52.0126	-52.2659	-52.4521	-52.5894	-52.6917
					-34.7005	-34.4889	-34.2997	-34.1105	-33.8786	-33.6385	-33.37	-33.016	-32.6457	-32.2083	-31.6671	-30.9896	-30.1025	-28.7882	-26.6846	-23.0204	-16.7013	-7.64771	1.54419	8.37199	11.851	12.1277	9.96297	6.04045	0.850423	-5.16154	-11.558	-18.0216	-24.2818	-30.072	-35.2091	-39.6403	-43.3492	-46.4498	-49.0499	-51.2085	-53.0172	-54.5227	-55.7902	-56.8746	-57.7637	-58.4961	-59.1105	-59.6354	-60.0749
					-51.0315	-51.062	-51.0742	-51.0498	-50.9888	-50.9277	-50.8789	-50.8301	-50.7996	-50.7263	-50.6531	-50.5493	-50.4578	-50.2686	-49.6399	-44.2017	-34.5703	-24.0906	-7.33032	13.5803	25.116	27.0081	22.1497	13.4277	3.37524	-6.70166	-16.5039	-25.8789	-34.2041	-41.0522	-46.3989	-50.5371	-53.7109	-55.9814	-57.6782	-58.9539	-59.906	-60.5408	-61.0046	-61.2854	-61.5051	-61.6333	-61.7249	-61.7554	-61.7432
					-32.4259	-32.3608	-32.313	-32.2723	-32.1981	-32.0964	-32.0038	-31.901	-31.7932	-31.6772	-31.5592	-31.4046	-31.1747	-30.7892	-28.9836	-22.17	-10.261	7.37508	20.403	23.3459	19.3848	11.7015	2.43429	-7.07296	-15.7583	-23.0499	-28.7486	-33.0292	-36.1572	-38.4308	-40.1235	-41.3747	-42.2801	-42.9454	-43.4448	-43.8253	-44.0643	-44.2403	-44.3858	-44.5099	-44.5872	-44.6493	-44.7052	-44.7489	-44.7784
					-38.7863	-38.7665	-38.736	-38.7054	-38.6902	-38.6787	-38.652	-38.6307	-38.5902	-38.5437	-38.4697	-38.3636	-38.2195	-37.8708	-36.0619	-31.4407	-24.8955	-15.7005	-2.71454	9.72137	17.7132	21.4943	22.3755	21.434	19.342	16.5039	13.1439	9.41467	5.48325	1.38474	-2.75955	-6.88629	-10.9428	-14.8209	-18.4547	-21.7415	-24.6277	-27.1317	-29.2686	-31.0753	-32.5829	-33.8493	-34.9144	-35.8192	-36.5593
					-39.4816	-39.4033	-39.3341	-39.2604	-39.1769	-39.0889	-38.9989	-38.8992	-38.7848	-38.6668	-38.5356	-38.3713	-38.1571	-37.6577	-35.7371	-31.5954	-25.415	-19.0491	-13.8316	-10.0154	-7.56327	-6.29883	-6.02163	-6.59383	-7.89897	-9.83226	-12.2157	-14.8539	-17.5542	-20.2113	-22.758	-25.1231	-27.3015	-29.2913	-31.0923	-32.7103	-34.167	-35.4655	-36.6262	-37.6704	-38.6007	-39.4307	-40.1805	-40.8493	-41.4454
					-27.9907	-27.9236	-27.854	-27.7747	-27.6965	-27.6318	-27.5732	-27.4744	-27.3853	-27.2766	-27.157	-27.019	-26.8579	-26.5906	-25.343	-20.5176	-10.9607	1.81396	12.2058	18.3069	20.4236	19.5349	16.5259	11.9836	6.45508	0.480957	-5.35645	-10.6873	-15.2869	-19.1663	-22.3865	-24.9988	-27.124	-28.8477	-30.249	-31.4063	-32.3584	-33.1335	-33.7634	-34.3005	-34.7424	-35.0989	-35.3833	-35.6323	-35.8325
					-40.4724	-40.4419	-40.3625	-40.2496	-40.1428	-40.0482	-39.9231	-39.7675	-39.5721	-39.389	-39.1846	-38.9404	-38.6505	-38.2904	-37.4542	-31.9489	-14.8407	4.12292	14.0869	15.1337	10.2173	2.05078	-7.78809	-17.8894	-26.9684	-34.3628	-40.0391	-44.2902	-47.3572	-49.5819	-51.1932	-52.2736	-53.0029	-53.5431	-53.9032	-54.1229	-54.2908	-54.3884	-54.4159	-54.4373	-54.4678	-54.483	-54.4891	-54.4983	-54.4891
					-43.7744	-43.7561	-43.7378	-43.7134	-43.6707	-43.6157	-43.5669	-43.5486	-43.5242	-43.4692	-43.4631	-43.4021	-43.3411	-43.219	-42.0959	-38.4155	-32.9346	-28.2776	-25.5005	-24.3896	-24.7009	-25.9705	-27.6489	-29.425	-31.0974	-32.6233	-34.021	-35.3271	-36.5112	-37.6099	-38.5803	-39.4226	-40.2222	-40.9668	-41.6565	-42.3096	-42.9016	-43.4204	-43.9331	-44.4458	-44.9158	-45.3003	-45.6421	-45.9961	-46.3684
					-44.6136	-44.5587	-44.4885	-44.3695	-44.2352	-44.0765	-43.924	-43.811	-43.6676	-43.5333	-43.399	-43.2495	-43.0725	-42.8589	-42.273	-37.5549	-24.9695	-4.04358	12.6495	20.3369	20.5811	15.8295	8.10242	-1.52893	-12.0422	-22.1497	-30.8868	-37.9242	-43.4143	-47.5952	-50.824	-53.2593	-55.0659	-56.4087	-57.431	-58.2153	-58.7921	-59.2224	-59.4818	-59.7137	-59.8907	-59.967	-59.9945	-59.9854	-59.9762
					-44.342	-44.2468	-44.1492	-44.0588	-43.9661	-43.8379	-43.7048	-43.5718	-43.4485	-43.3203	-43.1812	-43.0115	-42.7332	-42.2986	-40.5994	-34.7668	-26.2061	-14.209	2.91504	17.4292	23.7573	24.0442	20.8557	15.7153	9.67529	3.48389	-2.26318	-7.44141	-12.1289	-16.3	-20.0342	-23.4607	-26.582	-29.3958	-31.9299	-34.2188	-36.2793	-38.1543	-39.8169	-41.3062	-42.6501	-43.8416	-44.917	-45.8777	-46.7004
					-39.2303	-39.2242	-39.2151	-39.1876	-39.1357	-39.1022	-39.0503	-38.9923	-38.9221	-38.7878	-38.6719	-38.5498	-38.4308	-38.1836	-36.5265	-31.5216	-24.1913	-13.0432	2.38953	15.3015	22.3297	23.8495	21.2097	15.918	9.1156	1.43738	-6.5979	-14.5142	-21.8994	-28.3997	-33.7952	-38.1714	-41.6229	-44.2932	-46.4172	-48.0164	-49.231	-50.1343	-50.8087	-51.297	-51.6418	-51.8768	-52.0386	-52.1057	-52.1423
					-37.9688	-37.8918	-37.7905	-37.7014	-37.6086	-37.511	-37.4048	-37.2974	-37.1899	-37.085	-36.936	-36.7383	-36.521	-36.1938	-34.895	-28.5803	-15.5652	2.60498	16.8237	23.0518	22.7148	18.0603	10.9729	2.58057	-6.35742	-15.1367	-22.9956	-29.4849	-34.6021	-38.5144	-41.4539	-43.6792	-45.3088	-46.4722	-47.2986	-47.9102	-48.3557	-48.6475	-48.833	-48.9392	-48.9978	-49.0088	-48.9771	-48.938	-48.8953
					-39.5172	-39.4135	-39.3036	-39.1663	-39.0442	-38.8886	-38.6963	-38.5071	-38.3026	-38.0188	-37.7655	-37.4847	-37.085	-36.5051	-34.3994	-21.0999	4.00085	21.4905	26.2512	22.0215	12.9608	1.94397	-9.62219	-20.7001	-30.3375	-38.1622	-44.1864	-48.6755	-51.9836	-54.3365	-56.0242	-57.1899	-58.0414	-58.609	-59.0057	-59.3109	-59.4727	-59.5947	-59.6863	-59.726	-59.7809	-59.7748	-59.8084	-59.8145	-59.8022
					-39.7095	-39.5782	-39.447	-39.3066	-39.1693	-39.0045	-38.8458	-38.6871	-38.4918	-38.2935	-38.0676	-37.8204	-37.5153	-37.0758	-35.1685	-26.4252	-7.66602	12.2742	24.2584	28.1464	25.824	19.574	11.3617	2.20337	-7.2937	-16.4246	-24.6277	-31.5552	-37.1216	-41.5222	-44.9097	-47.5067	-49.4843	-50.9918	-52.1484	-53.0365	-53.7201	-54.2419	-54.6143	-54.9164	-55.1483	-55.304	-55.4352	-55.5359	-55.6213
					-33.6548	-33.5754	-33.4534	-33.3496	-33.3008	-33.197	-33.075	-32.9895	-32.8918	-32.6904	-32.4036	-32.0679	-31.6956	-31.2744	-29.8645	-22.2351	-4.71191	11.9385	19.0002	18.3472	12.5122	3.94287	-5.43823	-14.4287	-22.1741	-28.3508	-33.0566	-36.6516	-39.3555	-41.3574	-42.8223	-43.8721	-44.6472	-45.2637	-45.7336	-46.1121	-46.4661	-46.7651	-47.0276	-47.2656	-47.4609	-47.6746	-47.876	-48.053	-48.2849
					-38.8605	-38.7836	-38.7012	-38.6298	-38.5663	-38.4906	-38.4216	-38.3295	-38.2385	-38.1482	-38.0237	-37.8931	-37.6947	-37.262	-35.2197	-30.8716	-25.5988	-18.8879	-8.68286	3.61084	13.4912	19.3365	21.734	21.5851	19.6637	16.5515	12.7094	8.45947	3.99109	-0.578003	-5.14221	-9.63318	-13.9655	-18.0084	-21.6937	-24.9744	-27.8503	-30.3302	-32.442	-34.2236	-35.708	-36.9489	-37.9797	-38.8428	-39.5587
					-36.0266	-35.8459	-35.6421	-35.4529	-35.2612	-35.0598	-34.8364	-34.5837	-34.3079	-33.9795	-33.6328	-33.2495	-32.782	-32.1936	-31.0266	-24.2834	-4.8645	21.5686	33.8049	31.2366	20.238	6.55396	-7.08496	-19.7144	-30.2112	-37.9919	-43.3264	-46.8018	-49.0027	-50.3772	-51.1963	-51.6333	-51.8445	-51.9287	-51.9055	-51.8311	-51.7456	-51.6467	-51.5161	-51.3904	-51.2915	-51.1938	-51.1194	-51.0535	-50.9937
					-41.6809	-41.6046	-41.5527	-41.5039	-41.4429	-41.4185	-41.3605	-41.3055	-41.2048	-41.0858	-40.9668	-40.8234	-40.6616	-40.4083	-39.1754	-33.4717	-23.1171	-5.53589	13.3423	23.1323	23.941	18.927	10.7025	0.979614	-9.12781	-18.7958	-27.2766	-34.3384	-39.9048	-44.1956	-47.4945	-50.0458	-52.0355	-53.5797	-54.7668	-55.7251	-56.4667	-57.0618	-57.5348	-57.959	-58.3008	-58.5907	-58.847	-59.0637	-59.2285
					-38.6617	-38.5356	-38.387	-38.2609	-38.1307	-37.9883	-37.8153	-37.5956	-37.3983	-37.1887	-36.9466	-36.6923	-36.3241	-35.8256	-34.8307	-28.6357	-7.71484	22.0785	34.5988	30.8614	18.8619	3.83301	-11.6292	-25.8647	-37.1134	-44.9972	-50.2218	-53.6377	-55.8512	-57.251	-58.0892	-58.6039	-58.8969	-59.0393	-59.0902	-59.0861	-59.0434	-58.9661	-58.8359	-58.7179	-58.5958	-58.4351	-58.2947	-58.136	-57.9773
[truncated: 20 more columns]
