# Supplementary material for: Cell-type-specific control of basolateral amygdala neuronal circuits via entorhinal cortex-driven feedforward inhibition
Source: eLife. 2020 Jan 9;9:e50601. doi: 10.7554/eLife.50601 (PMC6984813; doi:10.7554/eLife.50601)
Supplement: Figure 3—source data 6. [file elife-50601-fig3-data6.xlsx]

## Sheet: Sheet1
		Panel	Group	Measure	Values		Panel	Group	Measure	Values at 50 mm from soma	Values at 100 mm from soma	Values at 150 mm from soma	Values at 200 mm from soma	Values at 250 mm from soma	Values at 300 mm from soma	Values at 350 mm from soma	Values at 400 mm from soma	Values at 450 mm from soma	Values at 500 mm from soma	Values at 550 mm from soma	Values at 600 mm from soma
		3H, left	PV	Soma perimeter (mm)	87.72		3J, left	PV	Dendrite length (mm)	287.74	535.31	591.56	272.72	208.66	21.29
					82.29					212.23	423.38	592.21	462.41	300.9	123.85	124.23	70.71
					78.66					398.54	1314.59	1471.61	1096.06	420.95	183.99
					95.14					345.05	636.93	1101.79	1150.45	1076.18	1023.32	765.89	576.98	409.33	84.06	40.37
					83.29					297.65	848.55	808.05	515.44	306.01	125.34	59.77	51.29	58.99	24.89
					121.43					121.87	461.13	774.33	941.62	857.31	450.41	222.65	135.51	82.4
			Sst, Group I		66.39			Sst, Group I		331.62	463.43	463.9	425.54	470.95	345.72	166.28	1.65
					72.11					222.56	695.75	1127.43	1060.39	1136.52	639.79	345.19	52.09
					70.06					573.58	1000.31	1050.98	881.2	238.85	54.86
					52.57					350.68	591.25	373.57	549.3	179.18
					72.93					330.3	762.8	811.95	959.92	776.54	363.12	102.19
					66.25					391.75	626.25	684.88	433.25	475.03	217.63	13.92
					84.22					402.27	1045.48	945.52	779.35	648.02	258.37
					70.61					405.89	988.26	708.27	613.99	424.82	90.68
		3H, right	PV	Soma area (mm^2)	500.98		3J, right	PV	Dendrite surface area (mm^2)	1535.01	3023.61	3204.77	1487.51	1196.02	128.61
					426.5					854.67	1705	2384.86	1862.17	1211.76	498.74	500.3	284.74
					426.76					1604.94	5293.96	5926.31	4413.91	1695.19	740.93
					615.37					2084.3	3847.49	6655.5	6949.46	6500.8	6181.53	4626.46	3485.32	2472.62	507.81	243.87
					384.75					1797.97	5125.78	4881.15	3113.6	1848.52	757.15	361.04	309.84	356.35	150.38
					802.55					490.78	1857.02	3118.3	3791.97	3452.47	1813.83	896.64	545.72	331.84
			Sst, Group I		326.24			Sst, Group I		1199.15	1681.9	1626.4	1459.2	1575.08	1180.12	557.47	4.73
					328.26					1435.41	4428.72	7599.65	7269.73	8075.26	4768.62	2482.9	374.7
					315.12					2768.1	4672.71	4852.82	4036.05	1074.37	223.37
					182.84					1997.22	3450.34	2345.35	4006.16	1133.31
					272.58					981.3	2305.25	2400.11	2946.68	2546.42	1347.95	294.02
					257.73					868.86	1463.2	1624.75	1064.16	1238.74	493.25	30.04
					427.19					1157.39	3007.96	2720.37	2242.27	1864.42	743.37
					302.94					1751.67	4258.08	2975.96	2485.69	1746.35	350.96
		3I, first	PV	Dendrite branchpoints	12		3S2D, right	Sst, Group II	Dendrite length (mm)	425	1023.68	1235.98	1171.33	1210.64	1320.58	857.98	250.76	11.92
					9					147.46	504.46	801.21	936.78	1108.53	749.15	324.66	269.29	96.24	58.31
					32					122.87	297.67	416.19	449.08	543.67	385.71	423.59	313.9	144.34	101.28	89.41	27.73
					33			Sst, Group II	Dendrite surface area (mm^2)	2192.46	5264.86	6477.13	6112.39	6291.13	6820.65	4430.12	1264.65	59.99
					21					1336.14	4570.89	7259.7	8488.11	10044.4	6788.01	2941.77	2440.03	872.01	528.38
					23					720.04	1695.17	2413.14	2575.01	3400.46	2329.96	2558.75	1985.06	1173.36	918.46	877.99	335.05
			Sst, Group I		20
					31
					24
					22
					33
					22
					29
					26
		3I, second	PV	Dendrite endpoints	18
					13
					38
					38
					24
					26
			Sst, Group I		26
					34
					30
					26
					40
					26
					35
					33
		3I, third	PV	Dendrite length (mm)	1917.27
					2309.92
					4885.73
					7210.36
					3096
					4047.23
			Sst, Group I		2669.09
					5279.73
					3799.78
					2043.99
					4106.81
					2842.72
					4079.03
					3231.9
		3I, fourth	PV	Dendrite surface area (mm^2)	479.32
					769.97
					814.29
					1802.59
					1032
					1349.08
			Sst, Group I		533.82
					1319.93
					759.96
					511
					1026.7
					710.68
					1019.76
					646.38
		3S2B, left	Sst, Group II	Soma perimeter (mm)	98.36
					105.33
					103.44
		3S2B, right	Sst, Group II	Soma area (mm^2)	665.49
					661.22
					672
		3S2C, first	Sst, Group II	Dendrite branchpoints	41
					30
					14
		3S2C, second	Sst, Group II	Dendrite endpoints	50
					35
					17
		3S2C, third	Sst, Group II	Dendrite length (mm)	7507.88
					4996.1
					3315.45
		3S2C, fourth	Sst, Group II	Dendrite surface area (mm^2)	38913.4
					45269.4
					20982.5
