# Supplementary material for: Cell-type-specific control of basolateral amygdala neuronal circuits via entorhinal cortex-driven feedforward inhibition
Source: eLife. 2020 Jan 9;9:e50601. doi: 10.7554/eLife.50601 (PMC6984813; doi:10.7554/eLife.50601)
Supplement: Figure 4—source data 1. — Normal data presented as mean ± s.e.m. Non-normal data presented as median and [1st quartile/3rd quartile]. [file elife-50601-fig4-data1.xlsx]

## Sheet: Sheet1
		Figure Panel	Data Structure	Test	Sample Size	Summary Statistics	Statistical Test Results
		C	Non-normal distribution	Mann-Whitney U test	nSst = 8, 3	Sst+ APs/stimulus = 0.93 [0.78/1.01]	p = 0.016
					nPV = 9, 3	PV+ APs/stimulus = 0.00 [0.00/0.003]
		D	Normal distribution	Unpaired t-test	nSst = 8, 3	Sst+ Vrest = -59.24 ± 2.01 mV	p = 0.034
					nPV = 9, 3	PV+ Vrest = -72.76 ± 5.14 mV
		E	Distribution of full data sample	Kolmogorov-Smirnov test	nSst = 161 events	N/A	p = 2.19 × 10-21
					nPV = 779 events
		E, inset	Non-normal distribution	Mann-Whitney U test	nSst= 5, 3	Sst+ subthreshold EPSP = 7.01 [5.19/8.46] mV	p = 0.030
					nPV = 8, 3	PV+ subthreshold EPSP = 1.95 [1.41/2.87] mV
		H	Non-normal distribution	Kruskal-Wallis test followed by posthoc Mann-Whitney U tests with a False Discovery Rate p value correction	nnFS Sst = 5, 5	nFS Sst+ uEPSC amplitude = -29.30 [-24.15/-34.16] pA	Kruskal-Wallis: p = 0.025
					nFS Sst = 8, 6	FS Sst+ uEPSC amplitude = -31.13 [-21.34/-43.43] pA	False Discovery Rate corrected α = 0.033
					nPV = 8, 8	PV+ uEPSC amplitude = -57.16 [-46.38/-120.23] pA	Mann-Whitney U tests:
							pnFS Sst vs FS Sst = 0.72
							pnFS Sst vs PV = 0.019
							p­FS Sst vs PV = 0.028
		K, amplitude	Normal distribution	One-way ANOVA followed by Tukey’s honestly significant difference posthoc test	nnFS Sst = 5, 5	nFS Sst+ sEPSC amplitude = -12.43 ± 3.12 pA	1-way ANOVA: p = 0.022
					nFS Sst = 15, 8	FS Sst+ sEPSC amplitude = -21.97 ± 1.61 pA	Tukey’s posthoc test:
					nPV = 12, 5	PV+ sEPSC amplitude = -21.24 ± 1.88 pA	pnFS Sst vs FS Sst = 0.021
							pnFS Sst vs PV = 0.041
							pFS Sst vs PV = 0.95
		K, frequency	Normal distribution	One-way ANOVA followed by Tukey’s honestly significant difference posthoc test	nnFS Sst = 5, 5	nFS Sst+ sEPSC frequency = 13.10 ± 2.43 Hz	1-way ANOVA: p = 0.022
					nFS Sst = 15, 8	FS Sst+ sEPSC frequency = 24.21 ± 2.00 Hz	Tukey’s posthoc test:
					nPV = 12, 5	PV+ sEPSC frequency = 27.99 ± 3.29 Hz	pnFS Sst vs FS Sst = 0.061
							pnFS Sst vs PV = 0.012
							pFS Sst vs PV = 0.54
		L	Non-normal distribution	Kruskal-Wallis test followed by posthoc Mann-Whitney U tests with a False Discovery Rate p value correction	nnFS Sst = 5, 5	nFS Sst+ uEPSC decay = 2.73 [2.08/3.30] ms	Kruskal-Wallis: p = 0.0033
					nFS Sst = 15, 8	FS Sst+ uEPSC decay = 1.75 [1.39/2.06] ms	False Discovery Rate corrected α = 0.033
					nPV = 12, 5	PV+ uEPSC decay = 1.51 [1.27/1.69] ms	Mann-Whitney U tests:
							pnFS Sst vs FS Sst = 0.023
							pnFS Sst vs PV = 3.23 × 10-4
							pFS Sst vs PV = 0.083
