# Supplementary material for: Cell-type-specific control of basolateral amygdala neuronal circuits via entorhinal cortex-driven feedforward inhibition
Source: eLife. 2020 Jan 9;9:e50601. doi: 10.7554/eLife.50601 (PMC6984813; doi:10.7554/eLife.50601)
Supplement: Figure 4—source data 2. [file elife-50601-fig4-data2.xlsx]

## Sheet: Sheet1
		Panel	Group	Measure	Values			Panel	Group	Measure	Values
		4C	Sst	AP per stimulus (count)	0			4E, cumulative distribution (all events)	Sst	stEPSP (mV)	0.4327
					1.02						0.573
					0.69						1.5435
					0.92						3.7896
					1.35						2.282
					0.94						2.1121
					1						3.2168
					0.86						2.3623
			PV		0						3.2351
					1.54						3.1802
					0.01						3.7084
					0						3.8732
					0						3.9647
					0						1.4256
					0						0.4552
					0						2.6319
					0						2.0338
		4D	Sst	Vrest (mV)	-63.0871						2.7601
					-56.5546						2.4793
					-58.4028						3.2789
					-66.1758						2.6113
					-52.4334						2.1047
					-60.009						1.0793
					-65.9346						2.1169
					-51.3217						2.8188
			PV		-72.6004						3.8216
					-65.2832						2.3262
					-61.3606						1.3252
					-83.8656						2.6863
					-72.3037						2.6192
					-98.5166						3.5992
					-46.059						3.7946
					-86.7588						4.3439
					-68.1354						3.6481
		4E, inset	Sst	stEPSP (cellular mean; mV)	2.7781						3.819
					5.9993						2.1252
					10.9348						3.0102
					7.6356						2.3144
					7.013						2.5098
			PV		2.4239						4.0051
					1.9881						2.5154
					0.8376						3.2784
					1.9194						2.7352
					1.6674						4.0169
					3.3105						2.1736
					10.19						2.0943
					1.1543						1.8014
		4H	nFS Sst	uEPSC amplitude (pA)	-27.2299						3.0038
					-29.3017						1.4047
					-30.7602						1.9967
					-14.9043						2.6988
					-44.354						3.5411
			FS Sst		-20.742						2.6256
					-38.1828						1.7162
					-48.6717						6.7699
					-11.8948						4.7347
					-32.721						2.7327
					-29.5377						1.0787
					-57.9059						1.744
					-21.9428						2.0797
			PV		-24.0312						3.1851
					-82.5807						5.834
					-66.3542						2.0559
					-157.882						3.7283
					-46.3582						4.9368
					-199.726						2.9606
					-47.9591						2.7164
					-46.4052						3.1131
		4S1A, left	nFS Sst	uEPSC latency (ms)	1.6077						0.3605
					1.4						0.0248
					1.6						2.6716
					0.675						2.8547
					1.1						2.5373
			FS Sst		1.15						3.3551
					0.975						0.7184
					0.8045						3.4081
					1.4						4.0245
					1.1						1.8944
					1.4286						2.0348
					1.2214						1.0643
					0.7						4.6893
			PV		1.325						5.7574
					0.9138						3.6395
					0.5741						3.4991
					1.992						3.1207
					1.35						3.0797
					0.93						1.4256
					0.9						1.3035
					2.4						2.7745
		4S1, right	nFS Sst	uEPSC jitter (ms)	0.3148						1.5721
					0						2.3521
					0.8042						2.7
					0.8302						2.7732
					0.2828						3.6765
			FS Sst		1.3435						3.3103
					0.9069						3.5756
					0.2459						5.8767
					0.1414						3.2094
					0.4583						3.7282
					0.1976						1.5065
					0.3725						4.0467
					0						4.297
			PV		0.9639						5.3529
					0.2748						7.2633
					0.2551						3.7276
					0.1913						7.0907
					1.4849						7.1578
					0.1512						5.7173
					0.4243						5.5587
					0						4.6736
		4K	nFS Sst	sEPSC frequency (Hz)	10.5485						5.2483
					5.685						8.3733
					20.1207						5.5536
					15.6986						4.0582
					13.4228						7.8851
			FS Sst		21.2993						6.0785
					18.6916						7.4152
					20.9644						7.7259
					32.3625						8.6964
					36.3636						3.4782
					24.6305						7.4211
					37.8788						3.3542
					23.6407						3.1554
					19.2864						9.3048
					24.57						5.0948
					29.3255						8.5616
					7.8432						4.8208
					18.1159						6.6684
					20.141						8.1189
					28.0899						4.3437
			PV		18.2815						5.7353
					17.094						7.6536
					36.63						7.0942
					36.63						9.2335
					14.3266						13.6478
					31.0559						15.5936
					53.7634						11.2418
					21.5983						11.3502
					36.0362						12.2225
					24.0385						11.3294
					18.7794						9.9812
					27.6243						5.9804
			nFS Sst	sEPSC amplitude (pA)	7.3902						3.6476
					4.4437						8.0611
					22.4402						8.0364
					13.5831						10.4246
					14.2744						9.6635
			FS Sst		24.09						6.5255
					14.825						7.2152
					30.9324						8.8376
					18.6899						4.5265
					24.3677						7.6475
					25.0987						6.7307
					31.8258						6.5627
					25.4407						7.6607
					17.4515						9.0828
					19.8208						8.6728
					23.9454						7.3606
					7.7649						7.3706
					19.1483						4.7269
					18.9019						5.2625
					27.1819				PV		0.6941
			PV		12.1201						1.3655
					17.8175						4.3135
					16.3843						2.3482
					21.6048						4.2219
					26.2495						1.2449
					21.7789						1.5806
					28.5167						1.4585
					29.6514						1.5012
					28.0423						1.0984
					11.3229						2.818
					15.4566						6.1078
					25.955						2.5617
		L	nFS Sst	sEPSC decay t (ms)	2.094						1.3776
					4.6508						1.8415
					2.0552						0.6326
					2.7306						1.7007
					2.8525						3.4585
			FS Sst		2.0577						4.3802
					2.6024						1.7013
					1.2479						2.9159
					3.0156						4.9484
					1.7532						1.5854
					1.6296						3.7033
					1.1353						1.8903
					1.3392						2.3541
					2.0528						2.0306
					1.9971						3.0987
					1.1843						1.2921
					4.4647						1.829
					1.7479						0.8891
					1.8824						0.2787
					1.5233						0.9684
			PV		1.6625						3.9164
					1.5946						0.6464
					0.9449						1.5314
					1.5199						1.5741
					1.5095						2.1662
					1.4024						2.8009
					1.2533						0.7993
					1.1872						3.3933
					1.9239						2.2519
					1.8303						3.3139
					1.7076						3.3017
					1.2824						0.6292
		4S1B	nFS Sst	20%-80% risetime (ms)	0.4						2.2649
					0.3						2.033
					0.4						2.4785
					0.4						1.0808
					0.4						1.8277
			FS Sst		0.4						2.6822
					0.4						2.1817
					0.4						1.7972
					0.4						1.7972
					0.4						3.3936
					0.4						3.3387
					0.3						5.2674
					0.4						2.6551
					0.4						4.8829
					0.4						1.0683
					0.3						2.6125
					0.4						2.7163
					0.4						2.2219
					0.4						2.6614
					0.4						0.8172
			PV		0.4						3.7713
					0.4						5.5413
					0.3						1.9158
					0.3						3.0816
					0.4						2.6261
					0.4						3.9017
					0.3						0.435
					0.4						2.913
					0.4						1.6984
					0.4						1.6959
					0.4						2.0377
					0.4						3.0753
											0.4081
											0.5546
											0.4942
											3.8816
											0.7566
											0.8848
											0.366
											1.7861
											1.5175
											5.8205
											3.8063
											3.0373
											1.0047
											3.5438
											3.1959
											5.3016
											2.8907
											0.9227
											3.2847
											4.9815
											3.8829
											4.658
											0.9092
											2.7647
											2.3496
											2.9417
											2.8318
											1.0184
											2.5809
											2.4528
											1.2076
											1.2687
											0.9673
											1.8218
											3.1341
											1.9866
											3.0486
											1.4183
											1.9676
											1.4793
											1.7723
											0.6492
											2.1032
											0.9069
											1.0106
											0.1928
											1.1379
											1.8459
											1.6994
											2.2549
											2.0046
											1.6405
											2.7879
											3.2579
											2.4461
											1.848
											2.4144
											0.974
											1.6698
											1.9017
											0.5834
											1.3522
											2.3104
											1.5231
											0.6198
											0.5038
											0.6129
											2.2861
											3.3603
											1.9382
											3.9707
											3.0308
											1.0163
											2.8108
											1.9074
											2.5666
											2.0539
											1.7031
											3.4975
											3.4365
											3.4609
											3.5707
											1.5395
											3.4988
											2.571
											1.6982
											1.332
											3.0096
											3.266
											3.2965
											4.3402
											3.1012
											1.9069
											0.7289
											2.4806
											1.6139
											2.0229
											1.1883
											1.4691
											1.524
											0.0042
											1.1944
											2.3321
											2.9913
											2.1246
											1.1786
											0.4889
											1.8467
											1.4866
											1.4439
											1.4927
											2.6707
											1.2765
											2.2591
											2.2469
											2.4727
											0.116
											0.0183
											1.0681
											0.0221
											0.9865
											0.2784
											0.4249
											0.0709
											0.2015
											0.4701
											1.4839
											0.4952
											0.0252
											0.3426
											0.1755
											0.4929
											0.499
											0.4562
											0.2271
											0.4957
											0.2882
											0.5323
											1.3868
											0.5218
											0.3875
											0.7843
											1.9928
											0.827
											1.2267
											0.5675
											0.3783
											0.7201
											0.8056
											0.4702
											0.5983
											0.5373
											3.4243
											1.1721
											0.5179
											1.0977
											0.4386
											0.5417
											1.7014
											0.5722
											0.4196
											0.2915
											0.8784
											0.5366
											0.2192
											0.9944
											0.5915
											3.2737
											0.3012
											7.8635
											0.4721
											0.0022
											0.5565
											0.8495
											0.5382
											0.1171
											0.2632
											0.1777
											1.0505
											0.074
											0.5561
											0.0919
											1.7887
											0.336
											0.5924
											0.2399
											0.9723
											4.8359
											0.7038
											0.1171
											0.1598
											0.404
											0.9228
											0.9472
											2.0973
											0.4066
											0.37
											0.193
											0.5315
											0.5132
											5.4449
											0.8123
											0.5193
											1.9342
											2.0868
											1.6901
											1.0309
											0.915
											2.0051
											2.8535
											1.4497
											1.2116
											1.8098
											2.3752
											2.54
											1.539
											1.5757
											1.7404
											2.5748
											1.8607
											2.172
											1.2504
											1.2321
											2.722
											1.4159
											1.3976
											1.2633
											1.2511
											2.7965
											2.4059
											1.7711
											1.9664
											1.6491
											2.5194
											2.2631
											1.5611
											1.5428
											2.1044
											2.3587
											2.9202
											1.7544
											1.8216
											1.1441
											2.0688
											2.5021
											1.7148
											1.3608
											1.8857
											2.7411
											1.8744
											1.9172
											1.4655
											3.144
											2.1755
											2.5417
											1.6811
											1.3332
											1.5957
											2.6155
											2.4019
											1.8281
											1.9319
											1.8464
											2.4944
											2.885
											1.4995
											0.5413
											1.0601
											2.6153
											2.4688
											0.8087
											0.8941
											1.7791
											3.1382
											2.1433
											2.4241
											1.0752
											1.2461
											2.5901
											2.23
											1.522
											1.8882
											0.8445
											2.5357
											1.9376
											1.7423
											1.492
											1.3211
											2.782
											2.135
											2.135
											1.4026
											1.8847
											2.4684
											2.7004
											2.2914
											1.6872
											1.5773
											2.6947
											2.5787
											1.7975
											2.3956
											1.1322
											0.989
											2.2036
											1.6604
											2.0388
											1.9777
											1.3523
											2.0237
											2.0053
											1.9748
											1.6025
											1.1101
											3.1853
											2.8618
											0.9392
											2.9534
											1.6272
											1.9263
											2.7808
											2.0239
											1.8042
											1.4656
											1.6243
											3.3882
											1.7647
											1.96
											3.274
											3.3289
											1.5589
											1.0035
											1.6077
											1.7799
											2.3414
											2.2499
											3.6232
											1.3954
											2.2009
											1.5478
											0.9253
											1.676
											0.8398
											1.5966
											1.5356
											1.3891
											3.1591
											2.1886
											1.9529
											1.2327
											2.3069
											1.7149
											1.8125
											3.5272
											2.1417
											1.5069
											1.7083
											1.5618
											1.9162
											2.2091
											1.5561
											1.2631
											1.2692
											1.0178
											2.1225
											1.1948
											2.0859
											0.3159
											1.2942
											1.1965
											1.3796
											1.282
											0.7693
											1.7264
											1.5433
											0.701
											1.7569
											1.1526
											1.7466
											1.7405
											0.9226
											1.3804
											1.24
											1.5047
											0.9065
											1.3338
											1.7305
											1.3276
											0.9555
											1.7001
											0.9067
											0.6503
											1.1997
											1.1488
											1.2709
											1.338
											0.9413
											1.1549
											1.3236
											1.1649
											1.116
											1.055
											1.2991
											1.0775
											4.996
											2.225
											3.7753
											3.9157
											1.6031
											2.598
											2.5858
											3.4097
											2.4454
											2.2701
											2.2945
											2.5387
											2.0626
											3.4237
											1.845
											2.2234
											2.2661
											1.4787
											1.9975
											3.0652
											2.2107
											2.876
											2.7722
											2.0337
											2.552
											4.7736
											2.7839
											2.0088
											2.5276
											1.7522
											4.3218
											3.156
											4.0655
											3.7542
											2.4248
											3.1512
											2.4126
											4.8784
											2.7788
											4.0974
											2.541
											2.4067
											2.1992
											2.4006
											2.4751
											3.7385
											3.6897
											3.7873
											3.1709
											3.206
											3.853
											3.1938
											2.4675
											1.8083
											2.4493
											3.0535
											3.4258
											4.5794
											1.4788
											4.1949
											4.1033
											2.4676
											3.4441
											2.4615
											3.5636
											2.5199
											2.2758
											2.4161
											6.2186
											5.7877
											2.8641
											3.9871
											1.8387
											3.6942
											4.3194
											3.6175
											9.7393
											4.4232
											8.543
											2.1603
											2.2396
											7.1347
											7.3178
											6.8722
											3.1291
											3.2816
											3.8188
											2.891
											8.9335
											2.2532
											2.6683
											2.7903
											2.2227
											2.3204
											3.0188
											4.502
											3.733
											3.2752
											2.6526
											7.4002
											8.1814
											14.3337
											10.9097
											9.1763
											9.0113
											11.764
											10.7569
											11.2391
											9.1212
											10.7556
											11.4331
											10.1025
											11.6101
											11.4697
											10.1198
											10.8949
											10.2602
											11.8471
											11.017
											10.2649
											14.3909
											9.8682
											9.9841
											9.4165
											9.4617
											10.6762
											8.8208
											14.0454
											9.1137
											11.1055
											12.8572
											10.9712
											9.3172
											11.2215
											12.7314
											12.292
											10.3877
											11.1445
											10.3328
											13.3227
											10.9118
											9.3371
											9.8559
											7.4755
											10.9595
											9.0247
											12.3511
											9.6595
											10.9595
											13.2847
											11.5636
											12.4364
											9.8485
											6.1925
											10.4156
											10.5072
											12.5152
											11.1542
											9.0607
											12.4706
											10.2733
											8.9855
											8.9367
											6.7882
											8.8961
											9.1037
											12.1554
											6.4669
											9.6042
											10.6799
											8.4338
											10.9728
											9.5202
											8.1774
											8.4545
											9.309
											7.9723
											9.6203
											10.7494
											11.5947
											10.2886
											8.8115
											9.6843
											11.021
											9.9907
											10.1738
											8.7822
											7.2075
											8.6845
											10.2584
											8.0001
											12.3702
											10.8687
											9.1475
											9.1011
											10.1204
											8.8631
											8.326
											7.4898
											0.9037
											1.1722
											0.6046
											1.453
											1.3065
											0.2847
											1.5421
											1.2003
											1.6336
											1.2918
											1.3217
											0.3391
											0.8823
											0.0644
											0.5283
											1.3973
											1.2325
											1.2569
											0.9029
											1.2203
											0.8343
											1.4141
											1.054
											0.4742
											2.0245
											0.5239
											0.8474
											0.4079
											0.7986
											0.8962
											1.544
											2.5205
											0.6956
											1.1839
											0.5247
											1.1634
											1.432
											0.7545
											0.9071
											0.7057
											1.0891
											1.0464
											0.7229
											1.5041
											1.3027
											2.639
											2.4498
											1.3084
											0.5455
											1.4807
											2.1582
											0.2722
											1.5173
											0.8154
											0.6236
											0.5442
											1.24
											1.0569
											3.7669
											1.0021
											0.4528
											1.0936
											0.9166
											0.5138
											1.38
											0.9955
											1.5143
											0.9223
											1.4594
											0.2194
											0.9885
											1.2936
											0.8359
											1.3791
											1.769
											0.6643
											1.2258
											1.9338
											1.3479
											2.4593
											1.3973
											1.025
											1.8429
											0.8541
											1.1094
											0.615
											0.7554
											1.3779
											1.5611
											2.0668
											0.8278
											0.4555
											2.3659
											1.2246
											0.6633
											0.8769
											0.9319
											1.3469
											1.2798
