# Supplementary material for: Cell-type-specific control of basolateral amygdala neuronal circuits via entorhinal cortex-driven feedforward inhibition
Source: eLife. 2020 Jan 9;9:e50601. doi: 10.7554/eLife.50601 (PMC6984813; doi:10.7554/eLife.50601)
Supplement: Figure 5—source data 1. — Normal data presented as mean ± s.e.m. Non-normal data presented as median and [1st quartile/3rd quartile]. [file elife-50601-fig5-data1.xlsx]

## Sheet: Sheet1
		Figure Panel	Data Structure	Test	Sample Size	Summary Statistics	Statistical Test Results
		A	Normal distribution	One-sample t-tests	nSst = 7, 4	Sst+ IN ΔVm = -7.18 ± 2.21 mV	pSst = 0.017
					nPV = 6, 3	PV+ APs/stimulus =-9.43 ± 3.16 mV	pPV = 0.031
		B, Sst+ Ctrl	Normal distribution	Paired t-test	n = 13, 6	EPSC latency = 7.01 ± 0.26 ms	p = 0.0018
						IPSC latency = 8.57 ± 0.38 ms
		B, Sst+ CNO	Normal distribution	Paired t-test	n = 13, 6	EPSC latency = 6.77 ± 0.26 ms	p = 8.80 × 10-4
						IPSC latency = 8.57 ± 0.31 ms
		B, PV+ Ctrl	Non-normal distribution	Wilcoxon signed-rank test	n = 13, 7	EPSC latency = 7.28 [5.89/7.41] ms	p = 2.44 × 10-4
						IPSC latency = 9.52 [7.40/10.30] ms
		B, PV+ CNO	Normal distribution	Paired t-test	n = 13, 7	EPSC latency = 6.87 ± 0.27 ms	p = 0.0042
						IPSC latency = 9.32 ± 0.66 ms
		B, WT Ctrl	Non-normal distribution	Wilcoxon signed-rank test	n = 12, 6	EPSC latency = 6.63 [6.41/7.17] ms	p = 0.0024
						IPSC latency = 9.27 [7.39/10.14] ms
		B, WT CNO	Normal distribution	Paired t-test	n = 12, 6	EPSC latency = 6.75 ± 0.30 ms	p = 0.0012
						IPSC latency = 8.50 ± 0.42 ms
		C, amplitude	Non-normal distribution	Wilcoxon signed-rank test	n = 13, 6	Sst+ Control = 223.27 [131.10/439.99] pA	p = 0.040
						Sst+ +CNO = 155.87 [108.44/388.54] pA
		C, I/E balance	Non-normal distribution	Wilcoxon signed-rank test	n = 13, 6	Sst+ Ctrl = 3.26 [1.85/4.88]	p = 0.013
						Sst+ +CNO = 1.95 [1.36/2.58]
		D, amplitude	Normal distribution	Paired t-tests	n = 13, 7	PV+ Ctrl = 238.06 ± 45.08 pA	p = 0.35
						PV+ CNO = 201.87 ± 28.20 pA
		D, I/E balance	Normal distribution	Paired t-tests	n = 13, 7	PV+ Ctrl = 3.53 ± 0.65	p = 0.85
						PV+ CNO = 3.63 ± 0.67
		E, amplitude	Non-normal distribution	Wilcoxon signed-rank test	n = 12, 6	WT Ctrl = 172.29 [135.00/313.01] pA	p = 0.73
						WT +CNO = 189.68 [91.11/550.64] pA
		E, I/E balance	Non-normal distribution	Wilcoxon signed-rank test	n = 12, 6	WT Ctrl = 1.64 [0.83/7.30]	p = 0.68
						WT +CNO = 2.34 [1.31/5.13]
