# Supplementary material for: Cell-type-specific control of basolateral amygdala neuronal circuits via entorhinal cortex-driven feedforward inhibition
Source: eLife. 2020 Jan 9;9:e50601. doi: 10.7554/eLife.50601 (PMC6984813; doi:10.7554/eLife.50601)
Supplement: Figure 5—source data 2. [file elife-50601-fig5-data2.xlsx]

## Sheet: Sheet1
		Panel	Group	Measure	Values		Panel	Group	Measure	Values		Panel	Group	Measure	Values
		5A	Sst-hM4Di	DVm (mV)	-17.4318		5C, left	Control	IPSC amplitude (pA)	317.2		5S1A	Control	EPSC amplitude (pA)	-71.4167
					-4.753					1433.3					-110.703
					-4.719					52.8					-59.8878
					-4.6564					789.8					-333.84
					-11.5804					57.9					-22.8431
					-7.7859					413.8					-47.2051
					0.672					223.3					-57.5326
			PV-hM4Di		-13.7434					294.3					-90.1438
					-22.4278					146.8					-127.728
					-7.0146					188.5					-90.4152
					-7.5924					222.8					-36.0517
					-5.9529					84					-229.204
					0.1352					518.6					-133.194
		5B, Sst-hM4Di	Control	EPSC onset latency (ms)	8.28			+CNO		155.867			+CNO		-68.1105
					6.51					898.726					-113.159
					5.88					44.3221					-48.5943
					7.24					452.18					-327.32
					7.97					34.0966					-19.7072
					7.14					119.921					-56.7023
					8.03					168.791					-76.7988
					6.79					450.467					-111.711
					5.4					129.083					-98.9648
					6.5					73.9883					-53.0511
					7.25					120.379					-34.9396
					8.19					207.698					-368.037
					5.91					367.892					-188.381
			+CNO		8.41		5C, right	Control	I/E balance	4.442		5S1B	Control	EPSC amplitude (pA)	-87.9755
					6.58					12.9471					-177.357
					5.65					0.8814					-81.2759
					6.12					2.3659					-86.0463
					8.325					2.5347					-58.655
					7.15					8.766					-65.976
					7.27					3.8807					-89.4355
					6.56					3.2646					-72.7739
					5.48					1.1494					-26.0944
					6.2667					2.0852					-60.6867
					6.2778					6.1791					-40.4652
					7.82					0.3664					-85.1662
					6.16					3.8933					-143.891
			Control	IPSC onset latency (ms)	9.85			+CNO		2.2884			+CNO		-60.8055
					6.73					7.9422					-294.928
					9					0.9121					-58.3306
					8.64					1.3815					-49.7434
					8.96					1.7302					-47.65
					11.8556					2.1149					-92.8114
					8.83					2.1978					-48.9735
					9.2					4.0324					-56.7746
					7.3					1.3043					-36.946
					8.07					1.3947					-45.3396
					6.54					3.4454					-39.5748
					8.24					0.5643					-78.152
					8.24					1.9529					-187.702
			+CNO		9.15		5D, left	Control	IPSC amplitude (pA)	362.596		5S1C	Control	EPSC amplitude (pA)	-65.1696
					7.19					111.725					-281.627
					11.2167					574.6					-110.187
					8.11					179.396					-35.4466
					8.6333					253.831					-101.15
					7.41					363.516					-85.3342
					9.87					114.869					-101.021
					8.54					448.626					-162.972
					7.45					90.9045					-33.8158
					9.37					246.804					-354.73
					7.8					249.642					-60.9363
					8.22					54.2484					-22.0442
					8.41					44.0437			+CNO		-93.0024
		5B, PV-hM4Di	Control	EPSC onset latency (ms)	6.82			+CNO		421.987					-305.296
					4.92					116.573					-100.978
					7.53					211.219					-44.5842
					7.34					95.0882					-75.2312
					7.63					219.202					-40.6244
					6.28					193.585					-82.4671
					7.28					112.333					-103.242
					5.94					305.896					-24.8973
					4.7667					242.032					-234.242
					7.3					271.811					-63.0215
					7.5					241.749					-73.0634
					5.74					35.9165
					7.38					156.92
			+CNO		6.49		5D, right	Control	I/E balance	4.1216
					5					0.6299
					7.64					7.0698
					7.4667					2.0849
					7.56					4.3275
					6.36					5.5098
					7.88					1.2844
					6					6.1647
					6.4					3.4837
					7.7375					4.0668
					8.19					6.1693
					5.64					0.637
					6.94					0.3061
			Control	IPSC onset latency (ms)	11.53			+CNO		6.9399
					10.2714					0.3953
					8.01					3.6211
					10.4					1.9116
					9.85					4.6002
					7.16					2.0858
					12.45					2.2937
					7.48					5.3879
					6.1875					6.551
					10.1889					5.995
					9.52					6.1087
					6.7286					0.4596
					8.2667					0.836
			+CNO		13.59		5E, left	Control	IPSC amplitude (pA)	401.2
					13.1429					224.8
					7.44					164
					10.3857					927.2
					9.79					180.6
					7.08					100.9
					10.16					52.9
					7.46					141.8
					7.0875					128.2
					9.37					142
					11.51					1020.9
					6.45					185.9
					7.67			+CNO		695.3
		5B, WT littermates	Control	EPSC onset latency (ms)	7.28					267.8
					6.53					197.1
					6.53					862.6
					9.59					165.2
					6.73					100.6
					6.63					37.4
					6.28					81.6
					7.28					69.5
					6.63					405.9
					5.04					1202.3
					7.06					182.3
					5.2167		5E, right	Control	I/E balance	6.1565
			+CNO		7.56					0.7982
					6.56					1.4886
					6.42					26.1573
					8.97					1.785
					7.03					1.1822
					6.12					0.5239
					6.36					0.8698
					7.15					3.7922
					6.8556					0.4004
					4.57					16.7543
					7.18					8.4351
					6.26					7.4767
			Control	IPSC onset latency (ms)	9.74					0.8772
					8.89					1.9519
					10.53					19.3473
					9.68					2.1963
					8.57					2.4763
					6.6					0.4537
					6.2					0.7907
					11.69					2.7902
					9.65					1.733
					11.6					19.0769
					7.53					2.4945
					7.25
			+CNO		8.79
					8.72
					9.5222
					9.43
					8.28
					5.55
					7.4
					11.3286
					9.3778
					8.12
					8.56
					6.88
